# Supplementary material for: A Novel Method to Verify Multilevel Computational Models of Biological Systems Using Multiscale Spatio-Temporal Meta Model Checking
Source: PubMed Central journal article supplement (PMC4871515; doi:10.1371/journal.pone.0154847), 2016-05-17
Supplement: pone.0154847.s004.pdf [file pone.0154847.s004.pdf]

# Formal definition of Bounded Linear Multiscale Spatial Temporal Logic (BLMSTL)

## Syntax

The syntax of BLMSTL will be defined by a context-free grammar using the Backus-Naur Form (BNF) notation. A definition of a non-terminal symbol (element) in such grammars has the following form:

$$\begin{aligned} \langle \text{defined-element} \rangle &::= \langle \text{element1} \rangle \\ &| \langle \text{element2} \rangle \\ &| \dots \end{aligned}$$

where  $::=$  introduces a new definition and  $|$  represents an alternative. In natural language this reads  $\langle \text{defined-element} \rangle$  is either an  $\langle \text{element1} \rangle$  or  $\langle \text{element2} \rangle$  or (...).

**Definition.** *The syntax of BLMSTL is given by the following grammar expressed in BNF:*

$$\begin{aligned} \langle \text{logic-property} \rangle &::= \langle \text{temporal-numeric-measure} \rangle \langle \text{comparator} \rangle \\ &| \langle \text{temporal-numeric-measure} \rangle \\ &| \langle \text{change-measure} \rangle (\langle \text{temporal-numeric-measure} \rangle) \langle \text{comparator} \rangle \\ &| \langle \text{temporal-numeric-measure} \rangle \\ &| \sim \langle \text{logic-property} \rangle \\ &| \langle \text{logic-property} \rangle \wedge \langle \text{logic-property} \rangle \\ &| \langle \text{logic-property} \rangle \vee \langle \text{logic-property} \rangle \\ &| \langle \text{logic-property} \rangle \Rightarrow \langle \text{logic-property} \rangle \\ &| \langle \text{logic-property} \rangle \Leftrightarrow \langle \text{logic-property} \rangle \\ &| \langle \text{logic-property} \rangle U[\langle \text{unsigned-real-number} \rangle, \langle \text{unsigned-real-number} \rangle] \\ &| \langle \text{logic-property} \rangle \\ &| F[\langle \text{unsigned-real-number} \rangle, \langle \text{unsigned-real-number} \rangle] \langle \text{logic-property} \rangle \\ &| G[\langle \text{unsigned-real-number} \rangle, \langle \text{unsigned-real-number} \rangle] \langle \text{logic-property} \rangle \\ &| X \langle \text{logic-property} \rangle \\ &| X [\langle \text{natural-number} \rangle] \langle \text{logic-property} \rangle \\ &| (\langle \text{logic-property} \rangle) \end{aligned}$$

$$\begin{aligned} \langle \text{temporal-numeric-measure} \rangle &::= \langle \text{real-number} \rangle \\ &| \langle \text{numeric-state-variable} \rangle \\ &| \langle \text{numeric-statistical-measure} \rangle \\ &| \langle \text{unary-numeric-measure} \rangle (\langle \text{temporal-numeric-measure} \rangle) \\ &| \langle \text{binary-numeric-measure} \rangle (\langle \text{temporal-numeric-measure} \rangle, \\ &| \langle \text{temporal-numeric-measure} \rangle) \end{aligned}$$

$$\begin{aligned} \langle \text{numeric-statistical-measure} \rangle &::= \langle \text{unary-statistical-measure} \rangle ( \\ &| \langle \text{numeric-measure-collection} \rangle) \\ &| \langle \text{binary-statistical-measure} \rangle (\langle \text{numeric-measure-collection} \rangle, \\ &| \langle \text{numeric-measure-collection} \rangle) \\ &| \langle \text{binary-statistical-quantile-measure} \rangle (\langle \text{numeric-measure-collection} \rangle, \\ &| \langle \text{real-number} \rangle) \end{aligned}$$

$\langle \text{numeric-measure-collection} \rangle ::= \langle \text{spatial-measure-collection} \rangle$   
 |  $[\text{unsigned-real-number}, \text{unsigned-real-number}] \langle \text{numeric-measure} \rangle$

$\langle \text{numeric-measure} \rangle ::= \langle \text{primary-numeric-measure} \rangle$   
 |  $\langle \text{unary-numeric-measure} \rangle(\langle \text{numeric-measure} \rangle)$   
 |  $\langle \text{binary-numeric-measure} \rangle(\langle \text{numeric-measure} \rangle, \langle \text{numeric-measure} \rangle)$

$\langle \text{primary-numeric-measure} \rangle ::= \langle \text{numeric-spatial-measure} \rangle$   
 |  $\langle \text{real-number} \rangle$   
 |  $\langle \text{numeric-state-variable} \rangle$

$\langle \text{numeric-spatial-measure} \rangle ::= \langle \text{unary-statistical-measure} \rangle($   
 $\langle \text{spatial-measure-collection} \rangle)$   
 |  $\langle \text{binary-statistical-measure} \rangle(\langle \text{spatial-measure-collection} \rangle,$   
 $\langle \text{spatial-measure-collection} \rangle)$   
 |  $\langle \text{binary-statistical-quantile-measure} \rangle(\langle \text{spatial-measure-collection} \rangle,$   
 $\langle \text{real-number} \rangle)$

$\langle \text{unary-statistical-measure} \rangle ::= \text{avg}$   
 | *count*  
 | *geomean*  
 | *harmean*  
 | *kurt*  
 | *max*  
 | *median*  
 | *min*  
 | *mode*  
 | *product*  
 | *skew*  
 | *stdev*  
 | *sum*  
 | *var*

$\langle \text{binary-statistical-measure} \rangle ::= \text{covar}$

$\langle \text{binary-statistical-quantile-measure} \rangle ::= \text{percentile}$   
 | *quartile*

$\langle \text{unary-numeric-measure} \rangle ::= \text{abs}$   
 | *ceil*  
 | *floor*  
 | *round*  
 | *sign*  
 | *sqrt*  
 | *trunc*

$\langle \text{binary-numeric-measure} \rangle ::= \text{add}$   
 | *div*  
 | *log*  
 | *mod*  
 | *multiply*

| *power*  
 | *subtract*

$\langle \text{spatial-measure-collection} \rangle ::= \langle \text{spatial-measure} \rangle (\langle \text{subset} \rangle)$   
 |  $\langle \text{unary-numeric-measure} \rangle (\langle \text{spatial-measure-collection} \rangle)$   
 |  $\langle \text{binary-numeric-measure} \rangle (\langle \text{spatial-measure-collection} \rangle, \langle \text{spatial-measure-collection} \rangle)$

$\langle \text{spatial-measure} \rangle ::= \text{clusteredness}$   
 | *density*  
 | *area*  
 | *perimeter*  
 | *distanceFromOrigin*  
 | *angle*  
 | *triangleMeasure*  
 | *rectangleMeasure*  
 | *circleMeasure*  
 | *centroidX*  
 | *centroidY*

$\langle \text{subset} \rangle ::= \langle \text{subset-specific} \rangle$   
 |  $\text{filter}(\langle \text{subset-specific} \rangle, \langle \text{constraint} \rangle)$   
 |  $\langle \text{subset-operation} \rangle (\langle \text{subset} \rangle, \langle \text{subset} \rangle)$

$\langle \text{subset-specific} \rangle ::= \text{regions}$   
 | *clusters*

$\langle \text{constraint} \rangle ::= \text{scaleAndSubsystem} \langle \text{comparator} \rangle \langle \text{scale-and-subsystem} \rangle$   
 |  $\langle \text{spatial-measure} \rangle \langle \text{comparator} \rangle \langle \text{filter-numeric-measure} \rangle$   
 |  $\sim \langle \text{constraint} \rangle$   
 |  $\langle \text{constraint} \rangle \wedge \langle \text{constraint} \rangle$   
 |  $\langle \text{constraint} \rangle \vee \langle \text{constraint} \rangle$   
 |  $\langle \text{constraint} \rangle \Rightarrow \langle \text{constraint} \rangle$   
 |  $\langle \text{constraint} \rangle \Leftrightarrow \langle \text{constraint} \rangle$   
 |  $(\langle \text{constraint} \rangle)$

$\langle \text{filter-numeric-measure} \rangle ::= \langle \text{primary-numeric-measure} \rangle$   
 |  $\langle \text{spatial-measure} \rangle$   
 |  $\langle \text{unary-numeric-measure} \rangle (\langle \text{filter-numeric-measure} \rangle)$   
 |  $\langle \text{binary-numeric-measure} \rangle (\langle \text{filter-numeric-measure} \rangle, \langle \text{filter-numeric-measure} \rangle)$

$\langle \text{subset-operation} \rangle ::= \text{difference}$   
 | *intersection*  
 | *union*

$\langle \text{change-measure} \rangle ::= d$   
 | *r*

$\langle \text{real-number} \rangle ::= \langle \text{unsigned-real-number} \rangle$   
 |  $\langle \text{sign} \rangle \langle \text{unsigned-real-number} \rangle$

$\langle \text{unsigned-real-number} \rangle ::= \langle \text{fractional-part} \rangle$   
|  $\langle \text{fractional-part} \rangle \langle \text{exponent-part} \rangle$

$\langle \text{fractional-part} \rangle ::= \langle \text{digit-sequence} \rangle . \langle \text{digit-sequence} \rangle$   
|  $. \langle \text{digit-sequence} \rangle$   
|  $\langle \text{digit-sequence} \rangle .$   
|  $\langle \text{digit-sequence} \rangle$

$\langle \text{digit-sequence} \rangle ::= \langle \text{digit} \rangle$   
|  $\langle \text{digit} \rangle \langle \text{digit-sequence} \rangle$

$\langle \text{digit} \rangle ::= 0$   
|  $1$   
|  $2$   
|  $3$   
|  $4$   
|  $5$   
|  $6$   
|  $7$   
|  $8$   
|  $9$

$\langle \text{natural-number} \rangle ::= \langle \text{digit-sequence} \rangle$   
|  $+ \langle \text{digit-sequence} \rangle$

$\langle \text{exponent-part} \rangle ::= e \langle \text{digit-sequence} \rangle$   
|  $E \langle \text{digit-sequence} \rangle$   
|  $e \langle \text{sign} \rangle \langle \text{digit-sequence} \rangle$   
|  $E \langle \text{sign} \rangle \langle \text{digit-sequence} \rangle$

$\langle \text{sign} \rangle ::= +$   
|  $-$

$\langle \text{comparator} \rangle ::= <$   
|  $<=$   
|  $=$   
|  $>=$   
|  $>$

$\langle \text{numeric-state-variable} \rangle ::=$   
 $\langle \text{state-variable} \rangle \langle \text{state-variable-scale-and-subsystem} \rangle$

$\langle \text{state-variable} \rangle ::= \{ \langle \text{string} \rangle \}$

$\langle \text{state-variable-scale-and-subsystem} \rangle ::= \epsilon$   
|  $(\text{scaleAndSubsystem} = \langle \text{scale-and-subsystem} \rangle)$

$\langle \text{string} \rangle ::= \langle \text{character} \rangle | \langle \text{character} \rangle \langle \text{string} \rangle$

$\langle \text{character} \rangle ::= \text{based on the Unicode character set except “\{” and “\}”}$

$\langle \text{scale-and-subsystem} \rangle ::= \langle \text{primary-scale-and-subsystem} \rangle .$   
 $\langle \text{primary-scale-and-subsystem} \rangle$

$\langle \text{primary-scale-and-subsystem} \rangle ::= \langle \text{scale-and-subsystem-character} \rangle$   
 $| \langle \text{scale-and-subsystem-character} \rangle \langle \text{primary-scale-and-subsystem} \rangle$

$\langle \text{scale-and-subsystem-character} \rangle ::= \langle \text{basic-latin-script-character} \rangle$   
 $| \langle \text{digit} \rangle$

$\langle \text{basic-latin-script-character} \rangle ::= a | b | c | d | e | f | g | h | i | j | k | l | m | n |$   
 $o | p | q | r | s | t | u | v | w | x | y | z | A | B | C | D | E | F | G | H | I$   
 $| J | K | L | M | N | O | P | Q | R | S | T | U | V | W | X | Y | Z$

The order of precedence of the operators is given by the definition of the BLMSTL syntax. In the absence of parentheses the logic expressions are evaluated from left to right.

## Semantics

The semantics of BLMSTL is defined with respect to executions of an MSSpDES  $\mathcal{M}$

$$\sigma = \{(s_0, t_0), (s_1, t_1), \dots\}$$

where  $s_0, s_1, \dots$  represent the states of the execution and  $t_0, t_1, \dots \in \mathbb{R}_+$  the time durations spent in each corresponding state. Throughout it is assumed that execution traces are time-divergent which means that only a finite number of transitions can occur in a finite amount of time. Given an execution trace  $\sigma = \{(s_0, t_0), (s_1, t_1), \dots\}$ , a time value  $t \in \mathbb{R}_+$  and a natural number  $i$ , the length of (or the number of states in) the execution trace is denoted by  $|\sigma|$ , the  $i$ -th state of the execution trace by  $\sigma[i]$ , the execution trace suffix starting at the  $i$ -th state by  $\sigma^i$ , the execution trace suffix starting after  $t$  time by  $\sigma(t) = \sigma^i$ , where  $i \in \mathbb{N}$  is the minimum index such that  $t \leq \sum_{j=0}^i t_j$ , and the fact that the execution  $\sigma$  satisfies a property  $\phi$  by  $\sigma \models \phi$ . For an execution trace  $\sigma$  at state  $s$  the value of a numeric state variable  $nsv$  is given by  $NV(s, nsv)$  and its associated scale and subsystem by  $SVSS(nsv)$ , respectively the value of a spatial state variable  $spsv$  is given by  $SpV(s, spsv)$  and its associated scale and subsystem by  $SVSS(spsv)$ .

In order to have a compact and easy to follow semantics description the full symbol names specific to BLMSTL were replaced with shorter abbreviations as described in Table 1.

**Definition.** Let  $\mathcal{M} = \langle S, T, \mu, NSV, SpSV, NV, CSpV, MA, SVSS \rangle$  be an MSSpDES and  $\sigma$  an execution of  $\mathcal{M}$ . The semantics of BLMSTL for  $\sigma$  is defined as follows:

- $\sigma \models tnm_1 \asymp tnm_2$  **if and only if**  $tnm_1(\sigma) \asymp tnm_2(\sigma)$ , where  $tnm_1(\sigma)$  and  $tnm_2(\sigma) \in \mathbb{R}$ , and  $\asymp \in \{<, <=, =, >=, >\}$ ;
- $\sigma \models cm(tnm_1) \asymp tnm_2$  **if and only if**  $|\sigma| > 1$  and  $cm(tnm_1, \sigma) \asymp tnm_2(\sigma)$ , where  $cm(tnm_1, \sigma), tnm_2(\sigma) \in \mathbb{R}$ , and  $\asymp \in \{<, <=, =, >=, >\}$ ;

Table 1: Translation of full BLMSTL symbol names to abbreviated forms. The left column contains the full BLMSTL symbol name. The right column contains the corresponding abbreviated form.

| Full BLMSTL symbol name               | Abbreviated BLMSTL symbol name |
|---------------------------------------|--------------------------------|
| <logic-property>                      | $\psi$                         |
| <temporal-numeric-measure>            | $tnm$                          |
| <numeric-statistical-measure>         | $nstm$                         |
| <numeric-measure-collection>          | $nmc$                          |
| <numeric-measure>                     | $nm$                           |
| <primary-numeric-measure>             | $pnm$                          |
| <numeric-spatial-measure>             | $nsm$                          |
| <unary-statistical-measure>           | $usm$                          |
| <binary-statistical-measure>          | $bsm$                          |
| <binary-statistical-quantile-measure> | $bsqm$                         |
| <unary-numeric-measure>               | $unm$                          |
| <binary-numeric-measure>              | $bnm$                          |
| <spatial-measure-collection>          | $smc$                          |
| <spatial-measure>                     | $sm$                           |
| <subset>                              | $ss$                           |
| <filter-numeric-measure>              | $fnm$                          |
| <comparator>                          | $\preceq$                      |
| <change-measure>                      | $cm$                           |
| <real-number>                         | $re$                           |
| <scale-and-subsystem>                 | $scsubsys$                     |
| <state-variable>                      | $sv$                           |
| <numeric-state-variable>              | $nsv$                          |
| <spatial-state-variable>              | $spsv$                         |

- $\sigma \models \sim \psi$  **if and only if**  $\sigma \not\models \psi$ ;
- $\sigma \models \psi_1 \wedge \psi_2$  **if and only if**  $\sigma \models \psi_1$  and  $\sigma \models \psi_2$ ;
- $\sigma \models \psi_1 \vee \psi_2$  **if and only if**  $\sigma \models \psi_1$  or  $\sigma \models \psi_2$ ;
- $\sigma \models \psi_1 \Rightarrow \psi_2$  **if and only if**  $\sigma \models \sim \psi_1$  or  $\sigma \models \psi_2$ ;
- $\sigma \models \psi_1 \Leftrightarrow \psi_2$  **if and only if**  $\sigma \models \psi_1 \Rightarrow \psi_2$  and  $\sigma \models \psi_2 \Rightarrow \psi_1$ ;
- $\sigma \models \psi_1 U[a, b] \psi_2$  **if and only if** there exists  $i, i \in [a, b]$ , such that  $\sigma(i) \models \psi_2$ , and for all  $j, j \in [a, i)$ , it holds that  $\sigma(j) \models \psi_1$  with  $a, b \in \mathbb{R}_+$ ;
- $\sigma \models F[a, b] \psi$  **if and only if** there exists  $i, i \in [a, b]$ , such that  $\sigma(i) \models \psi$  with  $a, b \in \mathbb{R}_+$ ;
- $\sigma \models G[a, b] \psi$  **if and only if** for all  $i, i \in [a, b]$ , it holds that  $\sigma(i) \models \psi$  with  $a, b \in \mathbb{R}_+$ ;
- $\sigma \models X \psi$  **if and only if**  $|\sigma| > 1$  and  $\sigma^1 \models \psi$ ;
- $\sigma \models X[k] \psi$  **if and only if**  $|\sigma| > k$  and  $\sigma^k \models \psi$  with  $k \in \mathbb{N}$ ;

- $\sigma \models (\psi)$  if and only if  $\sigma \models \psi$ .

An illustrative example of how to employ logic properties to encode the expected behaviour of a system is given below both in natural language and BLMSTL:

**Natural language:** Throughout the time interval  $[0, 100]$  the concentration of protein  $A$  is expected to always increase;

**BLMSTL:**  $G [0, 100] (d(\{A\}) > 0)$ .

The  $tnm$  symbol represents the category of temporal numeric measures. Considering a model execution  $\sigma$ ,  $tnm(\sigma)$  is evaluated to a real number based on one of the definitions below:

- **Real number:** if  $tnm = re$ , then  $tnm(\sigma) = re \in \mathbb{R}$ ;
- **Numeric state variable:** if  $tnm = nsu$ , then  $tnm(\sigma) = nsu(\sigma)$ ;
- **Numeric statistical measure:** if  $tnm = nstm$ , then  $tnm(\sigma) = nstm(\sigma)$ ;
- **Unary numeric measure:** if  $tnm = unm(tnm')$ , where  $unm$  is a unary numeric measure and  $tnm'$  is a temporal numeric measure, then  $tnm(\sigma) = unm(tnm'(\sigma))$  such that  $tnm'(\sigma) \in \mathbb{R}$ ;
- **Binary numeric measure:** if  $tnm = bnm(tnm', tnm'')$ , where  $bnm$  is a binary numeric measure, and  $tnm'$  and  $tnm''$  are temporal numeric measures, then  $tnm(\sigma) = bnm(tnm'(\sigma), tnm''(\sigma))$  such that  $tnm'(\sigma), tnm''(\sigma) \in \mathbb{R}$ .

The values of the *unary* (i.e.  $unm$ ) and *binary* (i.e.  $bnm$ ) *numeric measures* considering one (i.e.  $unm(re)$ ), respectively two real numbers (i.e.  $bnm(re', re'')$ ) are computed as described in Appendix A (Tables 2, respectively 3).

An illustrative example of how to employ temporal numeric measures, unary numeric measures and binary numeric measures to encode the expected behaviour of a system is given below both in natural language and BLMSTL:

**Natural language:** At some point within the time interval  $[0, 500]$  the (absolute value of the) difference between the concentration of chemical  $X$  and chemical  $Y$  is less than 20 M;

**BLMSTL:**  $F [0, 500] (abs(subtract(\{X\}, \{Y\})) < 20)$ .

The category of numeric statistical measures is represented by the  $nstm$  symbol. For a given model execution  $\sigma$ ,  $nstm(\sigma)$  is evaluated to a real number considering one of the definitions below:

- **Unary statistical numeric measure:** if  $nstm = usm(nmc)$ , where  $usm$  is a unary statistical measure and  $nmc$  is a numeric measure collection, then  $nstm(\sigma) = usm(nmc(\sigma))$  such that  $nmc(\sigma)$  represents a collection of real values;
- **Binary statistical numeric measure:** if  $nstm = bsm(nmc', nmc'')$ , where  $bsm$  is a binary statistical measure, and  $nmc'$  and  $nmc''$  are numeric measure collections, then  $nstm(\sigma) = bsm(nmc'(\sigma), nmc''(\sigma))$  such that  $nmc'(\sigma)$  and  $nmc''(\sigma)$  represent collections of real values;

- **Binary statistical quantile numeric measure:** if  $nstm = bsqm(nmc, re)$ , where  $bsqm$  is a binary statistical quantile measure,  $nmc$  is a numeric measure collection and  $re$  is a real number, then  $nstm(\sigma) = bsqm(nmc(\sigma), re)$  such that  $nmc(\sigma)$  represents a collection of real values.

The value of *unary statistical* (i.e.  $usm$ ), *binary statistical* (i.e.  $bsm$ ) and *binary statistical quantile* (i.e.  $bsqm$ ) *measures* considering a collection of real values (i.e.  $usm(nmc)$ ), respectively two collections of real values (i.e.  $bsm(nmc', nmc'')$ ) or a collection of real values and a real number (i.e.  $bsqm(nmc, re)$ ) is computed as described in Appendix B (Tables 4, 5, respectively 6). In case the numeric measure collections considered contain insufficient elements the corresponding numeric statistical measures are evaluated to zero.

The  $nmc$  symbol represents numeric measure collections. Given a model simulation  $\sigma$ ,  $nmc(\sigma)$  is evaluated to a collection of real values according to one of the following definitions:

- **Spatial measure collection:** if  $nmc = smc$ , then  $nmc(\sigma) = smc(\sigma)$ ;
- **Temporal numeric measure collection:** if  $nmc = [a, b] nm$ , where  $nm$  is a numeric measure, and  $a$  and  $b$  are real numbers, then  $nmc(\sigma) = \{nm(\sigma(i)) \mid nm(\sigma(i)) \in \mathbb{R} \text{ is the result of evaluating the numeric measure } nm \text{ against the subtrace } \sigma(i), \text{ for all } i \in [a, b] \text{ with } a, b \in \mathbb{R}_+\}$ .

An illustrative example of how to employ numeric measure collections and unary statistical measures to encode the expected behaviour of a system is given below both in natural language and BLMSTL:

**Natural language:** Considering the time interval [100, 200] the maximum upper value of the blood pressure corresponding to scale organism and subsystem human is less than 150;

**BLMSTL:**  $max([100, 200] \{bloodPressureUpperValue\} (scaleAndSubsystem = Organism.Human)) < 150$ .

The  $nm$  symbol represents the category of real-valued numeric measures. Considering a given execution  $\sigma$ ,  $nm(\sigma)$  is evaluated to a real number according to one of the definitions described below:

- **Primary numeric measure:** if  $nm = pnm$ , then  $nm(\sigma) = pnm(\sigma)$ ;
- **Unary numeric measure:** if  $nm = unm(nm')$ , where  $unm$  is a unary numeric measure and  $nm'$  is a numeric measure, then  $nm(\sigma) = unm(nm'(\sigma))$  such that  $nm'(\sigma) \in \mathbb{R}$ ;
- **Binary numeric measure:** if  $nm = bnm(nm', nm'')$ , where  $bnm$  is a binary numeric measure, and  $nm'$  and  $nm''$  are numeric measures, then  $nm(\sigma) = bnm(nm'(\sigma), nm''(\sigma))$  such that  $nm'(\sigma), nm''(\sigma) \in \mathbb{R}$ .

The  $pnm$  symbol corresponds to primary numeric (real-valued) measures. Considering a given execution  $\sigma$ ,  $pnm(\sigma)$  is evaluated to a real number according to one of the following definitions:

- **Numeric spatial measure:** if  $nm = nsm$ , then  $nm(\sigma) = nsm(\sigma)$ ;
- **Real number:** if  $nm = re$ , then  $nm(\sigma) = re \in \mathbb{R}$ ;



- **Numeric state variable:** if  $nm = nsv$ , then  $nm(\sigma) = nsv(\sigma)$ .

The  $nsm$  symbol represents the category of numeric (real-valued) spatial measures. Considering a given execution  $\sigma$ ,  $nsm(\sigma)$  is evaluated to a real number according to one of the definitions described below:

- **Unary statistical spatial measure:** if  $nsm = usm(smc)$ , where  $usm$  is a unary statistical measure and  $smc$  is a spatial measure collection, then  $nsm(\sigma) = usm(smc(\sigma))$  such that  $smc(\sigma)$  represents a collection of real values;
- **Binary statistical spatial measure:** if  $nsm = bsm(smc', smc'')$ , where  $bsm$  is a binary statistical measure, and  $smc'$  and  $smc''$  are spatial measure collections, then  $nsm(\sigma) = bsm(smc'(\sigma), smc''(\sigma))$  such that  $smc'(\sigma)$  and  $smc''(\sigma)$  represent collections of real values;
- **Binary statistical quantile spatial measure:** if  $nsm = bsqm(smc, re)$ , where  $bsqm$  is a binary statistical quantile measure,  $smc$  is a spatial measure collection and  $re$  is a real number, then  $nsm(\sigma) = bsqm(smc(\sigma), re)$  such that  $smc(\sigma)$  represents a collection of real values.

The  $smc$  symbol represents spatial measure collections. Considering a model execution  $\sigma$ ,  $smc(\sigma)$  is evaluated to a collection of real values using one of the definitions below:

- **Primary spatial measure collection:** if  $smc = sm(ss)$ , where  $sm$  is a spatial measure and  $ss$  is the subset of considered spatial entities, then  $smc(\sigma) = \{sm_{value} \mid sm_{value} \in \mathbb{R} \text{ is the result of evaluating the spatial measure } sm \text{ for all spatial entities in } ss(\sigma)\}$ ;
- **Unary numeric spatial measure collection:** if  $smc = unm(smc')$ , where  $unm$  is a unary numeric measure and  $smc'$  is a spatial measure collection, then  $smc(\sigma) = unm(smc'(\sigma))$ , where  $unm(smc'(\sigma)) = \{value \mid value = unm(smc_{value}) \text{ for all } smc_{value} \in smc'(\sigma)\}$ ;
- **Binary numeric spatial measure collection:** if  $smc = bnm(smc', smc'')$ , where  $bnm$  is a binary numeric measure, and  $smc'$  and  $smc''$  are spatial measure collections, then  $smc(\sigma) = bnm(smc'(\sigma), smc''(\sigma))$ , where  $bnm(smc'(\sigma), smc''(\sigma)) = \{value \mid value = bnm(smc'_{value}, smc''_{value}) \text{ where } smc'_{value} \text{ and } smc''_{value} \text{ are the } i\text{-th values in } smc'(\sigma), \text{ respectively } smc''(\sigma) \text{ for all } i, 1 \leq i \leq \min(|smc'(\sigma)|, |smc''(\sigma)|)\}$ .

Spatial measures  $sm$  are defined over the set {clusteredness, density, area, perimeter, distanceFromOrigin, angle, triangleMeasure, rectangleMeasure, circleMeasure, centroidX, centroidY} which is identical to the set of spatial measures computed for each detected region/cluster during the multiscale spatio-temporal analysis step of the model checking workflow.

Subsets of spatial entities are represented by the  $ss$  symbol. Considering a given execution  $\sigma$ ,  $ss(\sigma)$  is evaluated to a collection of spatial entities according to one of the definitions described below:

- **Specific subset:** if  $ss = specificSubset$ , then  $ss(\sigma) = specificSubset(\sigma)$ , where  $specificSubset(\sigma)$  represents the collection of all clusters/regions corresponding to  $\sigma[0]$ ;

- **Filtered specific subset:** if  $ss = filter(specificSubset, constraint)$ , where  $specificSubset$  has the semantics defined above and  $constraint$  is a logic property for encoding constraints on spatial measure values (e.g.  $area > 10$ ), then  $ss(\sigma) = filter(specificSubset(\sigma), constraint)$ ;
- **Subset operation result:** if  $ss = subsetOperation(ss', ss'')$ , where  $ss'$  and  $ss''$  are subsets of spatial entities, and  $subsetOperation$  is a subset operation, then  $ss(\sigma) = subsetOperation(ss'(\sigma), ss''(\sigma))$  such that  $ss'(\sigma)$  and  $ss''(\sigma)$  represent collections of spatial entities.

Given an execution  $\sigma$  the value of  $specificSubset(\sigma)$  is computed using one of the definitions described below:

- **Regions:** if  $specificSubset = regions$ , then  $specificSubset(\sigma) = \bigcup_{spsv \in SpSV} \{region \mid region \in regionsDetectionMechanism(SpV(\sigma[0], spsv)) \text{ such that } SpV \in CSpV \text{ is defined for state } \sigma[0] \text{ and spatial state variable } spsv\}$ ;
- **Clusters:** if  $specificSubset = clusters$ , then  $specificSubset(\sigma) = clustersDetectionMechanism(reg)$ , where  $reg = \bigcup_{spsv \in SpSV} \{region \mid region \in regionDetectionMechanism(SpV(\sigma[0], spsv)) \text{ such that } SpV \in CSpV \text{ is defined for state } \sigma[0] \text{ and spatial state variable } spsv\}$ .

An illustrative example of how to employ specific subsets of spatial entities and unary statistical measures to encode the expected behaviour of a system is given below both in natural language and BLMSTL:

**Natural language:** During the time interval [50.3, 112.7] the average area of the regions corresponding to scale tissue and subsystem cancerous liver tissue is increasing until it reaches a value greater than 2400;

**BLMSTL:**  $(d(avg(area(filter(regions, scaleAndSubsystem = Tissue.CancerousLiverTissue)))) > 0) \cup [50.3, 112.7]$   
 $(avg(area(filter(regions, scaleAndSubsystem = Tissue.CancerousLiverTissue)))) > 2400$ .

Subsets of spatial entities collections recorded by  $specificSubset$  can be computed using the  $filter$  predicate. Considering an execution  $\sigma$ , a collection of spatial entities  $specificSubset$  and a constraint on spatial measure values  $constraint$ ,  $filter(specificSubset(\sigma), constraint)$  is evaluated to a collection of spatial entities using the definition described below:

$$filter(specificSubset(\sigma), constraint) = \{se \mid se \text{ is a spatial entity in } specificSubset(\sigma) \text{ which satisfies } constraint \text{ i.e. } se \models constraint\}.$$

The semantics of the constraint satisfaction problem considering an execution  $\sigma$ , a spatial entity  $se$  and a constraint  $constraint$  is defined as follows:

- if  $constraint = scaleAndSubsystem \asymp scsubsys$ , then  $se \models scaleAndSubsystem \asymp scsubsys$  **if and only if** there exists a vertex  $v_{scsubsys} \in V_{MA}$  encoding the scale and subsystem  $scsubsys$ ,  $se$  was annotated with a scale and subsystem  $se_{scaleAndSubsystem}$  which has a corresponding vertex  $v_{se_{scaleAndSubsystem}} \in V_{MA}$ , and  $v_{se_{scaleAndSubsystem}} \asymp v_{scsubsys}$ .

$v_{scsubsys}$ , where  $V_{MA}$  is the set of vertices in the multiscale architecture graph  $MA$ , and  $\asymp \in \{<, <=, =, >=, >\}$ . To determine the truth value of expressions of the form  $v_{se_{scaleAndSubsystem}} \asymp v_{scsubsys}$  the partial orders  $<$  and  $\leq$  defined over the set of vertices  $V_{MA}$  are considered. Therefore  $v_{se_{scaleAndSubsystem}} < v_{scsubsys}$  holds if the path from the root of  $MA$  to  $v_{se_{scaleAndSubsystem}}$  passes through  $v_{scsubsys}$ . Conversely  $v_{se_{scaleAndSubsystem}} > v_{scsubsys}$  holds if the path from the root of  $MA$  to  $v_{scsubsys}$  passes through  $v_{se_{scaleAndSubsystem}}$ . Expressions  $v_{se_{scaleAndSubsystem}} \leq v_{scsubsys}$  and  $v_{se_{scaleAndSubsystem}} \geq v_{scsubsys}$  hold if  $v_{se_{scaleAndSubsystem}} < v_{scsubsys}$  or  $v_{se_{scaleAndSubsystem}} = v_{scsubsys}$ , respectively if  $v_{se_{scaleAndSubsystem}} > v_{scsubsys}$  or  $v_{se_{scaleAndSubsystem}} = v_{scsubsys}$ .

- if  $constraint = sm \asymp fnm$ , then  $se \models sm \asymp fnm$  **if and only if**  $sm(se) \asymp fnm(se, \sigma)$ , where  $sm(se)$  evaluates the spatial measure  $sm$  for the given spatial entity  $se$ ,  $sm \in \{\text{clusteredness, density, area, perimeter, distanceFromOrigin, angle, triangleMeasure, rectangleMeasure, circleMeasure, centroidX, centroidY}\}$ ,  $fnm(se, \sigma) \in \mathbb{R}$  represents a real number obtained by evaluating the filter numeric measure  $fnm$  against  $se$  and  $\sigma$ , and  $\asymp \in \{<, <=, =, >=, >\}$ .
- if  $constraint = \sim constraint_1$ , then  $se \models \sim constraint_1$  **if and only if**  $se \not\models constraint_1$ .
- if  $constraint = constraint_1 \wedge constraint_2$ , then  $se \models constraint_1 \wedge constraint_2$  **if and only if**  $se \models constraint_1$  and  $se \models constraint_2$ .
- if  $constraint = constraint_1 \vee constraint_2$ , then  $se \models constraint_1 \vee constraint_2$  **if and only if**  $se \models constraint_1$  or  $se \models constraint_2$ .
- if  $constraint = constraint_1 \Rightarrow constraint_2$ , then  $se \models constraint_1 \Rightarrow constraint_2$  **if and only if**  $se \models \sim constraint_1$  or  $se \models constraint_2$ .
- if  $constraint = constraint_1 \Leftrightarrow constraint_2$ , then  $se \models constraint_1 \Leftrightarrow constraint_2$  **if and only if**  $se \models constraint_1 \Rightarrow constraint_2$  and  $se \models constraint_2 \Rightarrow constraint_1$ .
- if  $constraint = (constraint)$ , then  $se \models (constraint)$  **if and only if**  $se \models constraint$ .

The  $fnm$  symbol represents the (real-valued) numeric measure computed for the *filter* predicate. Given a spatial entity  $se$  and an execution  $\sigma$ ,  $fnm(se, \sigma)$  is evaluated to a real number using one of the definitions given below:

- **Primary numeric measure:** if  $fnm = pnm$ , then  $fnm(se, \sigma) = pnm(\sigma)$ ;
- **Spatial measure:** if  $fnm = sm$ , where  $sm \in \{\text{clusteredness, density, area, perimeter, distanceFromOrigin, angle, triangleMeasure, rectangleMeasure, circleMeasure, centroidX, centroidY}\}$ , then  $fnm(se, \sigma) = sm(se)$ ;
- **Unary filter numeric measure:** if  $fnm = unm(fnM')$ , where  $unm$  is a unary numeric measure and  $fnM'$  is a filter numeric measure, then  $fnm(se, \sigma) = unm(fnM'(se, \sigma))$  such that  $fnM'(se, \sigma) \in \mathbb{R}$ ;

- **Binary filter numeric measure:** if  $fnm = bnm(fnm', fnm'')$ , where  $bnm$  is a binary numeric measure, and  $fnm'$  and  $fnm''$  are filter numeric measures, then  $fnm(se, \sigma) = bnm(fnm'(se, \sigma), fnm''(se, \sigma))$  such that  $fnm'(se, \sigma), fnm''(se, \sigma) \in \mathbb{R}$ .

The  $subsetOperation \in \{\text{difference, intersection, union}\}$  symbol represents the collection of operations defined over spatial entities subsets. Given two spatial entities subsets  $ss'$  and  $ss''$ ,  $subsetOperation(ss', ss'')$  is evaluated to a collection of spatial entities using one of the following definitions:

- **Difference:** if  $subsetOperation = \text{difference}$ , then  $subsetOperation(ss', ss'') = \{se \mid se \in ss' \text{ and } se \notin ss''\}$ ;
- **Intersection:** if  $subsetOperation = \text{intersection}$ , then  $subsetOperation(ss', ss'') = \{se \mid se \in ss' \text{ and } se \in ss''\}$ ;
- **Union:** if  $subsetOperation = \text{union}$ , then  $subsetOperation(ss', ss'') = \{se \mid se \in ss' \text{ or } se \in ss''\}$ .

An illustrative example of how to employ subset operations and multiple filtered subsets of spatial entities to encode the expected behaviour of a system is given below both in natural language and BLMSTL:

**Natural language:** The number of clusters of cells having the area greater than 20 or cellular regions having the area smaller than 50 is greater than 0;

**BLMSTL:**  $count(area(union(filter(clusters, area > 20), filter(regions, area < 50)))) > 0$ .

The  $cm \in \{d, r\}$  symbol represents the collection of measures which compute the rate at which the value of a temporal numeric measure  $tnm$  changes from the current state to the next. Considering a temporal numeric measure  $tnm$  and a given execution  $\sigma$ , such that  $|\sigma| > 1$ ,  $cm(tnm, \sigma)$  is evaluated to a real number according to one of the definitions below:

- **Derivative:** if  $cm = d$ , then  $cm(tnm, \sigma) = d(tnm, \sigma)$ , where

$$d(tnm, \sigma) = \frac{tnm(\sigma^1) - tnm(\sigma^0)}{t_0} ;$$

- **Ratio:** if  $cm = r$ , then  $cm(tnm, \sigma) = r(tnm, \sigma)$ , where

$$r(tnm, \sigma) = \frac{\frac{tnm(\sigma^1)}{tnm(\sigma^0)}}{t_0} ,$$

where  $t_0$  represents the time duration spent in state  $\sigma[0]$ .

Finally the symbol  $nsv$  represents real-valued numeric state variables. Given an execution  $\sigma$ ,  $nsv(\sigma)$  is evaluated to a real number according to one of the following definitions:

- **Numeric state variable without an associated scale and subsystem:** if  $nsv = sv$ , where  $sv$  is the identifier of a numeric state variable having no associated scale and subsystem (i.e.  $SVSS(sv)$  is not defined), then  $nsv(\sigma) = NV(\sigma[0], sv)$ ;

- **Numeric state variable with an associated scale and subsystem:**  
 if  $nsv = sv(scaleAndSubsystem = scs subsystems)$ , where  $sv$  is the identifier of a numeric state variable having the associated scale and subsystem  $scs subsystems$ , then  $nsv(\sigma) = NV(\sigma[0], sv)$  and  $SVSS(sv) = v_{scs subsystems}$  such that  $v_{scs subsystems} \in V_{MA}$  corresponds to the scale and subsystem  $scs subsystems$ .

An illustrative example of how to employ change measures and numeric state variables to encode the expected behaviour of a system is given below both in natural language and BLMSTL:

**Natural language:** Throughout the time interval [20.1, 20.5] the concentration of calcium doubles from one time point to the next relative to the duration spent in each state;

**BLMSTL:**  $G [20.1, 20.5] (r(\{Calcium\}) = 2)$ .

# Appendices

## A Numeric measures

Table 2: Name, description and semantics of unary numeric measures

| Name         | Description                                                                                          | Semantics                                                                                                                               |
|--------------|------------------------------------------------------------------------------------------------------|-----------------------------------------------------------------------------------------------------------------------------------------|
| <i>abs</i>   | Returns the absolute value of a number $n$                                                           | $abs(n) =  n $                                                                                                                          |
| <i>ceil</i>  | Rounds the number $n$ upward, returning the smallest integral value that is not less than $n$        | $ceil(n) = \lceil n \rceil$                                                                                                             |
| <i>floor</i> | Rounds the number $n$ downward, returning the largest integral value that is not greater than $n$    | $floor(n) = \lfloor n \rfloor$                                                                                                          |
| <i>round</i> | Returns the integral value that is nearest to number $n$ , with halfway cases rounded away from zero | $round(n) =$<br>$\begin{cases} \lfloor n + 0.5 \rfloor, & \text{if } n \geq 0 \\ \lceil n - 0.5 \rceil, & \text{otherwise} \end{cases}$ |
| <i>sign</i>  | Returns the sign of a number $n$                                                                     | $sign(n) =$<br>$\begin{cases} 1, & \text{if } n > 0 \\ 0, & \text{if } n = 0 \\ -1, & \text{otherwise} \end{cases}$                     |
| <i>sqrt</i>  | Returns the square root of a number $n$                                                              | $sqrt(n) = \sqrt{n}$                                                                                                                    |
| <i>trunc</i> | Rounds number $n$ toward zero                                                                        | $trunc(n) =$<br>$sign(n) \lfloor  n  \rfloor$                                                                                           |

Table 3: Name, description and semantics of binary numeric measures

| Name       | Description                                                 | Semantics                                              |
|------------|-------------------------------------------------------------|--------------------------------------------------------|
| <i>add</i> | Returns the sum of two numbers $n_1$ and $n_2$              | $add(n_1, n_2) = n_1 + n_2$                            |
| <i>div</i> | Returns the integer part of the division $n_1/n_2$          | $div(n_1, n_2) = \lfloor n_1/n_2 \rfloor$              |
| <i>log</i> | Returns the logarithm of a number $n$ in the given base $b$ | $log(n, b) = \log_b( n ),$<br>$n > 0, b > 0, b \neq 1$ |

|                 |                                                            |                                                    |
|-----------------|------------------------------------------------------------|----------------------------------------------------|
| <i>mod</i>      | Returns the remainder of the division $n_1/n_2$            | $mod(n_1, n_2) = n_1 - (n_2 \times div(n_1, n_2))$ |
| <i>multiply</i> | Returns the multiplication of two numbers $n_1$ and $n_2$  | $multiply(n_1, n_2) = n_1 \times n_2$              |
| <i>power</i>    | Returns the base $b$ raised at the power $e$               | $pow(b, e) = b^e$                                  |
| <i>subtract</i> | Returns the difference between two numbers $n_1$ and $n_2$ | $subtract(n_1, n_2) = n_1 - n_2$                   |

## B Statistical measures

Table 4: Name, description and semantics of unary statistical measures

| Name           | Description                                                                  | Semantics                                                                                                           |
|----------------|------------------------------------------------------------------------------|---------------------------------------------------------------------------------------------------------------------|
| <i>avg</i>     | Returns the arithmetic mean for the considered collection of <i>values</i>   | $avg(values) = \frac{1}{n} \sum_{i=1}^n (values_i)$ , where $n =  values $                                          |
| <i>count</i>   | Returns the number of elements in the considered collection of <i>values</i> | $count(values) =  values $                                                                                          |
| <i>geomean</i> | Returns the geometric mean for the considered collection of <i>values</i>    | $geomean(values) = \left( \prod_{i=1}^n (values_i) \right)^{\frac{1}{n}}$ , where $n =  values $                    |
| <i>harmean</i> | Returns the harmonic mean for the considered collection of <i>values</i>     | $harmean(values) = \frac{n}{\sum_{i=1}^n \frac{1}{(values_i)}}$ , where $n =  values $                              |
| <i>kurt</i>    | Returns the kurtosis for the considered collection of <i>values</i>          | $kurt(values) = \frac{n(n+1)}{(n-1)(n-2)(n-3)} - \frac{3(n-1)^2}{(n-2)(n-3)}$ , where $n =  values $ and $n \geq 4$ |
| <i>max</i>     | Returns the maximum for the considered collection of <i>values</i>           | $max(values) = \max_{i=1, n} (values_i)$ , where $n =  values $                                                     |

|                |                                                                               |                                                                                                                                          |
|----------------|-------------------------------------------------------------------------------|------------------------------------------------------------------------------------------------------------------------------------------|
| <i>median</i>  | Returns the median for the considered collection of <i>values</i>             | $median(values) =$ middle element from position $\lfloor  values /2 \rfloor$ (0-based indexing) in the ordered list of <i>values</i>     |
| <i>min</i>     | Returns the minimum for the considered collection of <i>values</i>            | $min(values) = \min_{i=1,n} (values_i),$ where $n =  values $                                                                            |
| <i>mode</i>    | Returns the mode for the considered collection of <i>values</i>               | $mode(values) =$ element which appears most often in the list of <i>values</i>                                                           |
| <i>product</i> | Returns the product for the considered collection of <i>values</i>            | $product(values) = \prod_{i=1}^n (values_i),$ where $n =  values $                                                                       |
| <i>skew</i>    | Returns the skewness for the considered collection of <i>values</i>           | $skew(values) = \frac{n}{(n-1)(n-2)} \sum_{i=1}^n \left( \frac{(values_i) - avg(values)}{stdev(values)} \right)^3,$ where $n =  values $ |
| <i>stdev</i>   | Returns the standard deviation for the considered collection of <i>values</i> | $stdev(values) = \sqrt{\frac{\sum_{i=1}^n ((values_i) - avg(values))^2}{(n-1)}},$ where $n =  values $                                   |
| <i>sum</i>     | Returns the sum for the considered collection of <i>values</i>                | $sum(values) = \sum_{i=1}^n (values_i),$ where $n =  values $                                                                            |
| <i>var</i>     | Returns the variance for the considered collection of <i>values</i>           | $var(values) = \frac{\sum_{i=1}^n ((values_i) - avg(values))^2}{(n-1)},$ where $n =  values $                                            |

---



Table 5: Name, description and semantics of binary statistical measures

| Name         | Description                                                                               | Semantics                                                                                                                                                                  |
|--------------|-------------------------------------------------------------------------------------------|----------------------------------------------------------------------------------------------------------------------------------------------------------------------------|
| <i>covar</i> | Returns the covariance for the considered collections of values $values_1$ and $values_2$ | $covar(values_1, values_2)$<br>$= \frac{1}{n-1} \sum_{i=1}^n ((values_{1_i}) - avg(values_1)) ((values_{2_i}) - avg(values_2))$ , where $n = \min( values_1 ,  values_2 )$ |

Table 6: Name, description and semantics of binary statistical quantile measures

| Name              | Description                                                                                        | Semantics                                                                                                                                                                                                                                                                 |
|-------------------|----------------------------------------------------------------------------------------------------|---------------------------------------------------------------------------------------------------------------------------------------------------------------------------------------------------------------------------------------------------------------------------|
| <i>percentile</i> | Returns the $pc$ -th ( $0 \leq pc \leq 100$ ) percentile for the considered collection of $values$ | $percentile(values, pc) = i$ -th value in the ordered list of $values$ , where $i = \lfloor \frac{pc}{100} \times n + \frac{1}{2} \rfloor$ , and $n =  values $                                                                                                           |
| <i>quartile</i>   | Returns the $i$ -th ( $i \in \{25, 50, 75\}$ ) quartile for the considered collection of $values$  | Let $v$ be the ordered list of $values$ , $m = median(values)$ , $L$ the sublist of values in $v$ smaller than $m$ , and $U$ the sublist of values in $v$ greater than $m$ . $quartile(values) = median(L)$ if $i = 25$ , $m$ if $i = 50$ , and $median(U)$ if $i = 75$ . |
