# Supplementary material for: A Novel Method to Verify Multilevel Computational Models of Biological Systems Using Multiscale Spatio-Temporal Meta Model Checking
Source: PubMed Central journal article supplement (PMC4871515; doi:10.1371/journal.pone.0154847), 2016-05-17
Supplement: pone.0154847.s007.pdf [file pone.0154847.s007.pdf]

## Model checking results for the uterine contractions of labour case study

For the convenience of the reader the set of PBLMSTL statements considered for the uterine contractions of labour case study will be restated below:

$$\begin{aligned}
 P > 0.9 [G [1, 329] & (((d(\{Pressure\}(scaleAndSubsystem = \\
 & Organ.Uterus)) > 0) \wedge ((d(sum(density(filter( \\
 & regions, scaleAndSubsystem = \\
 & Tissue.ContractileActivity)))) > 0))) \vee \\
 & ((d(\{Pressure\}(scaleAndSubsystem = \\
 & Organ.Uterus)) < 0) \wedge ((d(sum(density(filter( \\
 & regions, scaleAndSubsystem = \\
 & Tissue.ContractileActivity)))) < 0))) \vee \\
 & (d(\{Pressure\}(scaleAndSubsystem = \\
 & Organ.Uterus)) = 0))] \tag{4}
 \end{aligned}$$

$$\begin{aligned}
 P < 0.1 [F [1, 329] & ((d(\{Pressure\}(scaleAndSubsystem = \\
 & Organ.Uterus)) < 0) \wedge \\
 & (min(area(filter(regions, scaleAndSubsystem = \\
 & Tissue.BurstActivity))) = 16))] \tag{5}
 \end{aligned}$$

$$\begin{aligned}
 P > 0.9 [G [1, 329] & (((max(area(filter(regions, \\
 & scaleAndSubsystem = Tissue.RefractoryActivity)) \\
 & ) = 0)) \Rightarrow ((d(\{Pressure\}(scaleAndSubsystem = \\
 & Organ.Uterus)) < 0) \vee ((d(\{Pressure\}( \\
 & scaleAndSubsystem = Organ.Uterus)) = 0) \wedge \\
 & (\{Pressure\}(scaleAndSubsystem = Organ.Uterus) \\
 & = 0.5)))))] \tag{6}
 \end{aligned}$$

Each table describes the results corresponding to one of the PBLMSTL statements. The first column of each row represents the identifier of the model checking execution. The second column represents the evaluation result (T = true, F = false) of the PBLMSTL statement for that particular model checker execution. The number of MSTML files against which the PBLMSTL statement was executed, respectively how many of them evaluated true and how many evaluated false is provided in columns three, four and five. Finally column six presents the execution time (minutes:seconds format) corresponding to each model checker run. All executions of the model checker employed the probabilistic black-box model checking approach.

Table 1: Model checking results corresponding to PBLMSTL statement 4

| <b>Id</b> | <b>Result</b> | <b>#total</b> | <b>#true</b> | <b>#false</b> | <b>Execution time (min:sec)</b> |
|-----------|---------------|---------------|--------------|---------------|---------------------------------|
| 1         | TRUE          | 1             | 1            | 0             | 0:00.56                         |
| 2         | TRUE          | 1             | 1            | 0             | 0:00.54                         |
| 3         | TRUE          | 1             | 1            | 0             | 0:00.54                         |
| 4         | TRUE          | 1             | 1            | 0             | 0:00.54                         |
| 5         | TRUE          | 1             | 1            | 0             | 0:00.55                         |
| 6         | TRUE          | 1             | 1            | 0             | 0:00.54                         |
| 7         | TRUE          | 1             | 1            | 0             | 0:00.54                         |
| 8         | TRUE          | 1             | 1            | 0             | 0:00.54                         |
| 9         | TRUE          | 1             | 1            | 0             | 0:00.54                         |
| 10        | TRUE          | 1             | 1            | 0             | 0:00.54                         |
| 11        | TRUE          | 1             | 1            | 0             | 0:00.54                         |
| 12        | TRUE          | 1             | 1            | 0             | 0:00.54                         |
| 13        | TRUE          | 1             | 1            | 0             | 0:00.54                         |
| 14        | TRUE          | 1             | 1            | 0             | 0:00.54                         |
| 15        | TRUE          | 1             | 1            | 0             | 0:00.54                         |
| 16        | TRUE          | 1             | 1            | 0             | 0:00.54                         |
| 17        | TRUE          | 1             | 1            | 0             | 0:00.54                         |
| 18        | TRUE          | 1             | 1            | 0             | 0:00.54                         |
| 19        | TRUE          | 1             | 1            | 0             | 0:00.54                         |
| 20        | TRUE          | 1             | 1            | 0             | 0:00.55                         |
| 21        | TRUE          | 1             | 1            | 0             | 0:00.54                         |
| 22        | TRUE          | 1             | 1            | 0             | 0:00.54                         |
| 23        | TRUE          | 1             | 1            | 0             | 0:00.54                         |
| 24        | TRUE          | 1             | 1            | 0             | 0:00.55                         |
| 25        | TRUE          | 1             | 1            | 0             | 0:00.54                         |
| 26        | TRUE          | 1             | 1            | 0             | 0:00.54                         |
| 27        | TRUE          | 1             | 1            | 0             | 0:00.55                         |
| 28        | TRUE          | 1             | 1            | 0             | 0:00.54                         |
| 29        | TRUE          | 1             | 1            | 0             | 0:00.54                         |
| 30        | TRUE          | 1             | 1            | 0             | 0:00.54                         |
| 31        | TRUE          | 1             | 1            | 0             | 0:00.54                         |
| 32        | TRUE          | 1             | 1            | 0             | 0:00.53                         |
| 33        | TRUE          | 1             | 1            | 0             | 0:00.54                         |
| 34        | TRUE          | 1             | 1            | 0             | 0:00.54                         |
| 35        | TRUE          | 1             | 1            | 0             | 0:00.54                         |
| 36        | TRUE          | 1             | 1            | 0             | 0:00.54                         |
| 37        | TRUE          | 1             | 1            | 0             | 0:00.54                         |
| 38        | TRUE          | 1             | 1            | 0             | 0:00.54                         |
| 39        | TRUE          | 1             | 1            | 0             | 0:00.54                         |
| 40        | TRUE          | 1             | 1            | 0             | 0:00.54                         |
| 41        | TRUE          | 1             | 1            | 0             | 0:00.54                         |
| 42        | TRUE          | 1             | 1            | 0             | 0:00.55                         |
| 43        | TRUE          | 1             | 1            | 0             | 0:00.55                         |
| 44        | TRUE          | 1             | 1            | 0             | 0:00.54                         |
| 45        | TRUE          | 1             | 1            | 0             | 0:00.54                         |
| 46        | TRUE          | 1             | 1            | 0             | 0:00.54                         |

| <b>Id</b> | <b>Result</b> | <b>#total</b> | <b>#true</b> | <b>#false</b> | <b>Execution time (min:sec)</b> |
|-----------|---------------|---------------|--------------|---------------|---------------------------------|
| 47        | TRUE          | 1             | 1            | 0             | 0:00.53                         |
| 48        | TRUE          | 1             | 1            | 0             | 0:00.55                         |
| 49        | TRUE          | 1             | 1            | 0             | 0:00.54                         |
| 50        | TRUE          | 1             | 1            | 0             | 0:00.54                         |
| 51        | TRUE          | 1             | 1            | 0             | 0:00.54                         |
| 52        | TRUE          | 1             | 1            | 0             | 0:00.54                         |
| 53        | TRUE          | 1             | 1            | 0             | 0:00.54                         |
| 54        | TRUE          | 1             | 1            | 0             | 0:00.55                         |
| 55        | TRUE          | 1             | 1            | 0             | 0:00.54                         |
| 56        | TRUE          | 1             | 1            | 0             | 0:00.54                         |
| 57        | TRUE          | 1             | 1            | 0             | 0:00.54                         |
| 58        | TRUE          | 1             | 1            | 0             | 0:00.54                         |
| 59        | TRUE          | 1             | 1            | 0             | 0:00.54                         |
| 60        | TRUE          | 1             | 1            | 0             | 0:00.53                         |
| 61        | TRUE          | 1             | 1            | 0             | 0:00.54                         |
| 62        | TRUE          | 1             | 1            | 0             | 0:00.53                         |
| 63        | TRUE          | 1             | 1            | 0             | 0:00.56                         |
| 64        | TRUE          | 1             | 1            | 0             | 0:00.54                         |
| 65        | TRUE          | 1             | 1            | 0             | 0:00.54                         |
| 66        | TRUE          | 1             | 1            | 0             | 0:00.54                         |
| 67        | TRUE          | 1             | 1            | 0             | 0:00.54                         |
| 68        | TRUE          | 1             | 1            | 0             | 0:00.56                         |
| 69        | TRUE          | 1             | 1            | 0             | 0:00.52                         |
| 70        | TRUE          | 1             | 1            | 0             | 0:00.54                         |
| 71        | TRUE          | 1             | 1            | 0             | 0:00.55                         |
| 72        | TRUE          | 1             | 1            | 0             | 0:00.54                         |
| 73        | TRUE          | 1             | 1            | 0             | 0:00.53                         |
| 74        | TRUE          | 1             | 1            | 0             | 0:00.54                         |
| 75        | TRUE          | 1             | 1            | 0             | 0:00.54                         |
| 76        | TRUE          | 1             | 1            | 0             | 0:00.54                         |
| 77        | TRUE          | 1             | 1            | 0             | 0:00.54                         |
| 78        | TRUE          | 1             | 1            | 0             | 0:00.53                         |
| 79        | TRUE          | 1             | 1            | 0             | 0:00.54                         |
| 80        | TRUE          | 1             | 1            | 0             | 0:00.53                         |
| 81        | TRUE          | 1             | 1            | 0             | 0:00.53                         |
| 82        | TRUE          | 1             | 1            | 0             | 0:00.54                         |
| 83        | TRUE          | 1             | 1            | 0             | 0:00.54                         |
| 84        | TRUE          | 1             | 1            | 0             | 0:00.55                         |
| 85        | TRUE          | 1             | 1            | 0             | 0:00.54                         |
| 86        | TRUE          | 1             | 1            | 0             | 0:00.54                         |
| 87        | TRUE          | 1             | 1            | 0             | 0:00.54                         |
| 88        | TRUE          | 1             | 1            | 0             | 0:00.55                         |
| 89        | TRUE          | 1             | 1            | 0             | 0:00.53                         |
| 90        | TRUE          | 1             | 1            | 0             | 0:00.54                         |
| 91        | TRUE          | 1             | 1            | 0             | 0:00.54                         |
| 92        | TRUE          | 1             | 1            | 0             | 0:00.54                         |
| 93        | TRUE          | 1             | 1            | 0             | 0:00.53                         |
| 94        | TRUE          | 1             | 1            | 0             | 0:00.55                         |

| <b>Id</b> | <b>Result</b> | <b>#total</b> | <b>#true</b> | <b>#false</b> | <b>Execution time (min:sec)</b> |
|-----------|---------------|---------------|--------------|---------------|---------------------------------|
| 95        | TRUE          | 1             | 1            | 0             | 0:00.53                         |
| 96        | TRUE          | 1             | 1            | 0             | 0:00.54                         |
| 97        | TRUE          | 1             | 1            | 0             | 0:00.54                         |
| 98        | TRUE          | 1             | 1            | 0             | 0:00.54                         |
| 99        | TRUE          | 1             | 1            | 0             | 0:00.52                         |
| 100       | TRUE          | 1             | 1            | 0             | 0:00.54                         |
| 101       | TRUE          | 1             | 1            | 0             | 0:00.55                         |
| 102       | TRUE          | 1             | 1            | 0             | 0:00.54                         |
| 103       | TRUE          | 1             | 1            | 0             | 0:00.53                         |
| 104       | TRUE          | 1             | 1            | 0             | 0:00.55                         |
| 105       | TRUE          | 1             | 1            | 0             | 0:00.54                         |
| 106       | TRUE          | 1             | 1            | 0             | 0:00.55                         |
| 107       | TRUE          | 1             | 1            | 0             | 0:00.54                         |
| 108       | TRUE          | 1             | 1            | 0             | 0:00.53                         |
| 109       | TRUE          | 1             | 1            | 0             | 0:00.53                         |
| 110       | TRUE          | 1             | 1            | 0             | 0:00.53                         |
| 111       | TRUE          | 1             | 1            | 0             | 0:00.54                         |
| 112       | TRUE          | 1             | 1            | 0             | 0:00.54                         |
| 113       | TRUE          | 1             | 1            | 0             | 0:00.54                         |
| 114       | TRUE          | 1             | 1            | 0             | 0:00.54                         |
| 115       | TRUE          | 1             | 1            | 0             | 0:00.54                         |
| 116       | TRUE          | 1             | 1            | 0             | 0:00.54                         |
| 117       | TRUE          | 1             | 1            | 0             | 0:00.55                         |
| 118       | TRUE          | 1             | 1            | 0             | 0:00.54                         |
| 119       | TRUE          | 1             | 1            | 0             | 0:00.54                         |
| 120       | TRUE          | 1             | 1            | 0             | 0:00.54                         |
| 121       | TRUE          | 1             | 1            | 0             | 0:00.54                         |
| 122       | TRUE          | 1             | 1            | 0             | 0:00.53                         |
| 123       | TRUE          | 1             | 1            | 0             | 0:00.54                         |
| 124       | TRUE          | 1             | 1            | 0             | 0:00.53                         |
| 125       | TRUE          | 1             | 1            | 0             | 0:00.54                         |
| 126       | TRUE          | 1             | 1            | 0             | 0:00.54                         |
| 127       | TRUE          | 1             | 1            | 0             | 0:00.54                         |
| 128       | TRUE          | 1             | 1            | 0             | 0:00.55                         |
| 129       | TRUE          | 1             | 1            | 0             | 0:00.54                         |
| 130       | TRUE          | 1             | 1            | 0             | 0:00.55                         |
| 131       | TRUE          | 1             | 1            | 0             | 0:00.55                         |
| 132       | TRUE          | 1             | 1            | 0             | 0:00.54                         |
| 133       | TRUE          | 1             | 1            | 0             | 0:00.54                         |
| 134       | TRUE          | 1             | 1            | 0             | 0:00.54                         |
| 135       | TRUE          | 1             | 1            | 0             | 0:00.53                         |
| 136       | TRUE          | 1             | 1            | 0             | 0:00.54                         |
| 137       | TRUE          | 1             | 1            | 0             | 0:00.54                         |
| 138       | TRUE          | 1             | 1            | 0             | 0:00.56                         |
| 139       | TRUE          | 1             | 1            | 0             | 0:00.54                         |
| 140       | TRUE          | 1             | 1            | 0             | 0:00.54                         |
| 141       | TRUE          | 1             | 1            | 0             | 0:00.53                         |
| 142       | TRUE          | 1             | 1            | 0             | 0:00.54                         |

| <b>Id</b> | <b>Result</b> | <b>#total</b> | <b>#true</b> | <b>#false</b> | <b>Execution time (min:sec)</b> |
|-----------|---------------|---------------|--------------|---------------|---------------------------------|
| 143       | TRUE          | 1             | 1            | 0             | 0:00.54                         |
| 144       | TRUE          | 1             | 1            | 0             | 0:00.55                         |
| 145       | TRUE          | 1             | 1            | 0             | 0:00.54                         |
| 146       | TRUE          | 1             | 1            | 0             | 0:00.54                         |
| 147       | TRUE          | 1             | 1            | 0             | 0:00.54                         |
| 148       | TRUE          | 1             | 1            | 0             | 0:00.54                         |
| 149       | TRUE          | 1             | 1            | 0             | 0:00.54                         |
| 150       | TRUE          | 1             | 1            | 0             | 0:00.54                         |
| 151       | TRUE          | 1             | 1            | 0             | 0:00.54                         |
| 152       | TRUE          | 1             | 1            | 0             | 0:00.55                         |
| 153       | TRUE          | 1             | 1            | 0             | 0:00.54                         |
| 154       | TRUE          | 1             | 1            | 0             | 0:00.54                         |
| 155       | TRUE          | 1             | 1            | 0             | 0:00.54                         |
| 156       | TRUE          | 1             | 1            | 0             | 0:00.54                         |
| 157       | TRUE          | 1             | 1            | 0             | 0:00.54                         |
| 158       | TRUE          | 1             | 1            | 0             | 0:00.54                         |
| 159       | TRUE          | 1             | 1            | 0             | 0:00.54                         |
| 160       | TRUE          | 1             | 1            | 0             | 0:00.55                         |
| 161       | TRUE          | 1             | 1            | 0             | 0:00.55                         |
| 162       | TRUE          | 1             | 1            | 0             | 0:00.53                         |
| 163       | TRUE          | 1             | 1            | 0             | 0:00.53                         |
| 164       | TRUE          | 1             | 1            | 0             | 0:00.54                         |
| 165       | TRUE          | 1             | 1            | 0             | 0:00.54                         |
| 166       | TRUE          | 1             | 1            | 0             | 0:00.54                         |
| 167       | TRUE          | 1             | 1            | 0             | 0:00.54                         |
| 168       | TRUE          | 1             | 1            | 0             | 0:00.54                         |
| 169       | TRUE          | 1             | 1            | 0             | 0:00.54                         |
| 170       | TRUE          | 1             | 1            | 0             | 0:00.55                         |
| 171       | TRUE          | 1             | 1            | 0             | 0:00.54                         |
| 172       | TRUE          | 1             | 1            | 0             | 0:00.54                         |
| 173       | TRUE          | 1             | 1            | 0             | 0:00.54                         |
| 174       | TRUE          | 1             | 1            | 0             | 0:00.54                         |
| 175       | TRUE          | 1             | 1            | 0             | 0:00.54                         |
| 176       | TRUE          | 1             | 1            | 0             | 0:00.54                         |
| 177       | TRUE          | 1             | 1            | 0             | 0:00.54                         |
| 178       | TRUE          | 1             | 1            | 0             | 0:00.55                         |
| 179       | TRUE          | 1             | 1            | 0             | 0:00.56                         |
| 180       | TRUE          | 1             | 1            | 0             | 0:00.54                         |
| 181       | TRUE          | 1             | 1            | 0             | 0:00.55                         |
| 182       | TRUE          | 1             | 1            | 0             | 0:00.54                         |
| 183       | TRUE          | 1             | 1            | 0             | 0:00.55                         |
| 184       | TRUE          | 1             | 1            | 0             | 0:00.54                         |
| 185       | TRUE          | 1             | 1            | 0             | 0:00.54                         |
| 186       | TRUE          | 1             | 1            | 0             | 0:00.53                         |
| 187       | TRUE          | 1             | 1            | 0             | 0:00.55                         |
| 188       | TRUE          | 1             | 1            | 0             | 0:00.53                         |
| 189       | TRUE          | 1             | 1            | 0             | 0:00.54                         |
| 190       | TRUE          | 1             | 1            | 0             | 0:00.54                         |

| <b>Id</b> | <b>Result</b> | <b>#total</b> | <b>#true</b> | <b>#false</b> | <b>Execution time (min:sec)</b> |
|-----------|---------------|---------------|--------------|---------------|---------------------------------|
| 191       | TRUE          | 1             | 1            | 0             | 0:00.54                         |
| 192       | TRUE          | 1             | 1            | 0             | 0:00.54                         |
| 193       | TRUE          | 1             | 1            | 0             | 0:00.54                         |
| 194       | TRUE          | 1             | 1            | 0             | 0:00.54                         |
| 195       | TRUE          | 1             | 1            | 0             | 0:00.55                         |
| 196       | TRUE          | 1             | 1            | 0             | 0:00.54                         |
| 197       | TRUE          | 1             | 1            | 0             | 0:00.52                         |
| 198       | TRUE          | 1             | 1            | 0             | 0:00.54                         |
| 199       | TRUE          | 1             | 1            | 0             | 0:00.54                         |
| 200       | TRUE          | 1             | 1            | 0             | 0:00.54                         |
| 201       | TRUE          | 1             | 1            | 0             | 0:00.54                         |
| 202       | TRUE          | 1             | 1            | 0             | 0:00.53                         |
| 203       | TRUE          | 1             | 1            | 0             | 0:00.54                         |
| 204       | TRUE          | 1             | 1            | 0             | 0:00.53                         |
| 205       | TRUE          | 1             | 1            | 0             | 0:00.54                         |
| 206       | TRUE          | 1             | 1            | 0             | 0:00.54                         |
| 207       | TRUE          | 1             | 1            | 0             | 0:00.54                         |
| 208       | TRUE          | 1             | 1            | 0             | 0:00.54                         |
| 209       | TRUE          | 1             | 1            | 0             | 0:00.53                         |
| 210       | TRUE          | 1             | 1            | 0             | 0:00.54                         |
| 211       | TRUE          | 1             | 1            | 0             | 0:00.53                         |
| 212       | TRUE          | 1             | 1            | 0             | 0:00.54                         |
| 213       | TRUE          | 1             | 1            | 0             | 0:00.54                         |
| 214       | TRUE          | 1             | 1            | 0             | 0:00.53                         |
| 215       | TRUE          | 1             | 1            | 0             | 0:00.54                         |
| 216       | TRUE          | 1             | 1            | 0             | 0:00.54                         |
| 217       | TRUE          | 1             | 1            | 0             | 0:00.53                         |
| 218       | TRUE          | 1             | 1            | 0             | 0:00.54                         |
| 219       | TRUE          | 1             | 1            | 0             | 0:00.54                         |
| 220       | TRUE          | 1             | 1            | 0             | 0:00.54                         |
| 221       | TRUE          | 1             | 1            | 0             | 0:00.54                         |
| 222       | TRUE          | 1             | 1            | 0             | 0:00.55                         |
| 223       | TRUE          | 1             | 1            | 0             | 0:00.55                         |
| 224       | TRUE          | 1             | 1            | 0             | 0:00.54                         |
| 225       | TRUE          | 1             | 1            | 0             | 0:00.54                         |
| 226       | TRUE          | 1             | 1            | 0             | 0:00.54                         |
| 227       | TRUE          | 1             | 1            | 0             | 0:00.55                         |
| 228       | TRUE          | 1             | 1            | 0             | 0:00.54                         |
| 229       | TRUE          | 1             | 1            | 0             | 0:00.55                         |
| 230       | TRUE          | 1             | 1            | 0             | 0:00.54                         |
| 231       | TRUE          | 1             | 1            | 0             | 0:00.54                         |
| 232       | TRUE          | 1             | 1            | 0             | 0:00.53                         |
| 233       | TRUE          | 1             | 1            | 0             | 0:00.54                         |
| 234       | TRUE          | 1             | 1            | 0             | 0:00.54                         |
| 235       | TRUE          | 1             | 1            | 0             | 0:00.54                         |
| 236       | TRUE          | 1             | 1            | 0             | 0:00.54                         |
| 237       | TRUE          | 1             | 1            | 0             | 0:00.54                         |
| 238       | TRUE          | 1             | 1            | 0             | 0:00.53                         |

| <b>Id</b> | <b>Result</b> | <b>#total</b> | <b>#true</b> | <b>#false</b> | <b>Execution time (min:sec)</b> |
|-----------|---------------|---------------|--------------|---------------|---------------------------------|
| 239       | TRUE          | 1             | 1            | 0             | 0:00.54                         |
| 240       | TRUE          | 1             | 1            | 0             | 0:00.54                         |
| 241       | TRUE          | 1             | 1            | 0             | 0:00.54                         |
| 242       | TRUE          | 1             | 1            | 0             | 0:00.54                         |
| 243       | TRUE          | 1             | 1            | 0             | 0:00.53                         |
| 244       | TRUE          | 1             | 1            | 0             | 0:00.54                         |
| 245       | TRUE          | 1             | 1            | 0             | 0:00.54                         |
| 246       | TRUE          | 1             | 1            | 0             | 0:00.54                         |
| 247       | TRUE          | 1             | 1            | 0             | 0:00.54                         |
| 248       | TRUE          | 1             | 1            | 0             | 0:00.54                         |
| 249       | TRUE          | 1             | 1            | 0             | 0:00.54                         |
| 250       | TRUE          | 1             | 1            | 0             | 0:00.54                         |
| 251       | TRUE          | 1             | 1            | 0             | 0:00.54                         |
| 252       | TRUE          | 1             | 1            | 0             | 0:00.54                         |
| 253       | TRUE          | 1             | 1            | 0             | 0:00.54                         |
| 254       | TRUE          | 1             | 1            | 0             | 0:00.54                         |
| 255       | TRUE          | 1             | 1            | 0             | 0:00.54                         |
| 256       | TRUE          | 1             | 1            | 0             | 0:00.53                         |
| 257       | TRUE          | 1             | 1            | 0             | 0:00.54                         |
| 258       | TRUE          | 1             | 1            | 0             | 0:00.53                         |
| 259       | TRUE          | 1             | 1            | 0             | 0:00.54                         |
| 260       | TRUE          | 1             | 1            | 0             | 0:00.55                         |
| 261       | TRUE          | 1             | 1            | 0             | 0:00.55                         |
| 262       | TRUE          | 1             | 1            | 0             | 0:00.54                         |
| 263       | TRUE          | 1             | 1            | 0             | 0:00.55                         |
| 264       | TRUE          | 1             | 1            | 0             | 0:00.55                         |
| 265       | TRUE          | 1             | 1            | 0             | 0:00.54                         |
| 266       | TRUE          | 1             | 1            | 0             | 0:00.55                         |
| 267       | TRUE          | 1             | 1            | 0             | 0:00.54                         |
| 268       | TRUE          | 1             | 1            | 0             | 0:00.52                         |
| 269       | TRUE          | 1             | 1            | 0             | 0:00.54                         |
| 270       | TRUE          | 1             | 1            | 0             | 0:00.55                         |
| 271       | TRUE          | 1             | 1            | 0             | 0:00.54                         |
| 272       | TRUE          | 1             | 1            | 0             | 0:00.54                         |
| 273       | TRUE          | 1             | 1            | 0             | 0:00.55                         |
| 274       | TRUE          | 1             | 1            | 0             | 0:00.54                         |
| 275       | TRUE          | 1             | 1            | 0             | 0:00.55                         |
| 276       | TRUE          | 1             | 1            | 0             | 0:00.53                         |
| 277       | TRUE          | 1             | 1            | 0             | 0:00.54                         |
| 278       | TRUE          | 1             | 1            | 0             | 0:00.55                         |
| 279       | TRUE          | 1             | 1            | 0             | 0:00.54                         |
| 280       | TRUE          | 1             | 1            | 0             | 0:00.54                         |
| 281       | TRUE          | 1             | 1            | 0             | 0:00.54                         |
| 282       | TRUE          | 1             | 1            | 0             | 0:00.54                         |
| 283       | TRUE          | 1             | 1            | 0             | 0:00.53                         |
| 284       | TRUE          | 1             | 1            | 0             | 0:00.54                         |
| 285       | TRUE          | 1             | 1            | 0             | 0:00.54                         |
| 286       | TRUE          | 1             | 1            | 0             | 0:00.52                         |

| <b>Id</b> | <b>Result</b> | <b>#total</b> | <b>#true</b> | <b>#false</b> | <b>Execution time (min:sec)</b> |
|-----------|---------------|---------------|--------------|---------------|---------------------------------|
| 287       | TRUE          | 1             | 1            | 0             | 0:00.54                         |
| 288       | TRUE          | 1             | 1            | 0             | 0:00.54                         |
| 289       | TRUE          | 1             | 1            | 0             | 0:00.53                         |
| 290       | TRUE          | 1             | 1            | 0             | 0:00.54                         |
| 291       | TRUE          | 1             | 1            | 0             | 0:00.54                         |
| 292       | TRUE          | 1             | 1            | 0             | 0:00.54                         |
| 293       | TRUE          | 1             | 1            | 0             | 0:00.54                         |
| 294       | TRUE          | 1             | 1            | 0             | 0:00.54                         |
| 295       | TRUE          | 1             | 1            | 0             | 0:00.54                         |
| 296       | TRUE          | 1             | 1            | 0             | 0:00.54                         |
| 297       | TRUE          | 1             | 1            | 0             | 0:00.54                         |
| 298       | TRUE          | 1             | 1            | 0             | 0:00.54                         |
| 299       | TRUE          | 1             | 1            | 0             | 0:00.54                         |
| 300       | TRUE          | 1             | 1            | 0             | 0:00.54                         |
| 301       | TRUE          | 1             | 1            | 0             | 0:00.54                         |
| 302       | TRUE          | 1             | 1            | 0             | 0:00.54                         |
| 303       | TRUE          | 1             | 1            | 0             | 0:00.54                         |
| 304       | TRUE          | 1             | 1            | 0             | 0:00.54                         |
| 305       | TRUE          | 1             | 1            | 0             | 0:00.54                         |
| 306       | TRUE          | 1             | 1            | 0             | 0:00.54                         |
| 307       | TRUE          | 1             | 1            | 0             | 0:00.54                         |
| 308       | TRUE          | 1             | 1            | 0             | 0:00.54                         |
| 309       | TRUE          | 1             | 1            | 0             | 0:00.54                         |
| 310       | TRUE          | 1             | 1            | 0             | 0:00.54                         |
| 311       | TRUE          | 1             | 1            | 0             | 0:00.55                         |
| 312       | TRUE          | 1             | 1            | 0             | 0:00.54                         |
| 313       | TRUE          | 1             | 1            | 0             | 0:00.55                         |
| 314       | TRUE          | 1             | 1            | 0             | 0:00.54                         |
| 315       | TRUE          | 1             | 1            | 0             | 0:00.54                         |
| 316       | TRUE          | 1             | 1            | 0             | 0:00.55                         |
| 317       | TRUE          | 1             | 1            | 0             | 0:00.55                         |
| 318       | TRUE          | 1             | 1            | 0             | 0:00.54                         |
| 319       | TRUE          | 1             | 1            | 0             | 0:00.53                         |
| 320       | TRUE          | 1             | 1            | 0             | 0:00.54                         |
| 321       | TRUE          | 1             | 1            | 0             | 0:00.54                         |
| 322       | TRUE          | 1             | 1            | 0             | 0:00.53                         |
| 323       | TRUE          | 1             | 1            | 0             | 0:00.55                         |
| 324       | TRUE          | 1             | 1            | 0             | 0:00.54                         |
| 325       | TRUE          | 1             | 1            | 0             | 0:00.54                         |
| 326       | TRUE          | 1             | 1            | 0             | 0:00.54                         |
| 327       | TRUE          | 1             | 1            | 0             | 0:00.54                         |
| 328       | TRUE          | 1             | 1            | 0             | 0:00.54                         |
| 329       | TRUE          | 1             | 1            | 0             | 0:00.55                         |
| 330       | TRUE          | 1             | 1            | 0             | 0:00.55                         |
| 331       | TRUE          | 1             | 1            | 0             | 0:00.54                         |
| 332       | TRUE          | 1             | 1            | 0             | 0:00.54                         |
| 333       | TRUE          | 1             | 1            | 0             | 0:00.53                         |
| 334       | TRUE          | 1             | 1            | 0             | 0:00.55                         |



| Id  | Result | #total | #true | #false | Execution time (min:sec) |
|-----|--------|--------|-------|--------|--------------------------|
| 335 | TRUE   | 1      | 1     | 0      | 0:00.52                  |
| 336 | TRUE   | 1      | 1     | 0      | 0:00.54                  |
| 337 | TRUE   | 1      | 1     | 0      | 0:00.53                  |
| 338 | TRUE   | 1      | 1     | 0      | 0:00.54                  |
| 339 | TRUE   | 1      | 1     | 0      | 0:00.55                  |
| 340 | TRUE   | 1      | 1     | 0      | 0:00.52                  |
| 341 | TRUE   | 1      | 1     | 0      | 0:00.55                  |
| 342 | TRUE   | 1      | 1     | 0      | 0:00.55                  |
| 343 | TRUE   | 1      | 1     | 0      | 0:00.55                  |
| 344 | TRUE   | 1      | 1     | 0      | 0:00.54                  |
| 345 | TRUE   | 1      | 1     | 0      | 0:00.54                  |
| 346 | TRUE   | 1      | 1     | 0      | 0:00.53                  |
| 347 | TRUE   | 1      | 1     | 0      | 0:00.54                  |
| 348 | TRUE   | 1      | 1     | 0      | 0:00.54                  |
| 349 | TRUE   | 1      | 1     | 0      | 0:00.55                  |
| 350 | TRUE   | 1      | 1     | 0      | 0:00.55                  |
| 351 | TRUE   | 1      | 1     | 0      | 0:00.54                  |
| 352 | TRUE   | 1      | 1     | 0      | 0:00.54                  |
| 353 | TRUE   | 1      | 1     | 0      | 0:00.55                  |
| 354 | TRUE   | 1      | 1     | 0      | 0:00.54                  |
| 355 | TRUE   | 1      | 1     | 0      | 0:00.54                  |
| 356 | TRUE   | 1      | 1     | 0      | 0:00.53                  |
| 357 | TRUE   | 1      | 1     | 0      | 0:00.54                  |
| 358 | TRUE   | 1      | 1     | 0      | 0:00.53                  |
| 359 | TRUE   | 1      | 1     | 0      | 0:00.55                  |
| 360 | TRUE   | 1      | 1     | 0      | 0:00.54                  |
| 361 | TRUE   | 1      | 1     | 0      | 0:00.54                  |
| 362 | TRUE   | 1      | 1     | 0      | 0:00.53                  |
| 363 | TRUE   | 1      | 1     | 0      | 0:00.55                  |
| 364 | TRUE   | 1      | 1     | 0      | 0:00.54                  |
| 365 | TRUE   | 1      | 1     | 0      | 0:00.55                  |
| 366 | TRUE   | 1      | 1     | 0      | 0:00.54                  |
| 367 | TRUE   | 1      | 1     | 0      | 0:00.53                  |
| 368 | TRUE   | 1      | 1     | 0      | 0:00.55                  |
| 369 | TRUE   | 1      | 1     | 0      | 0:00.54                  |
| 370 | TRUE   | 1      | 1     | 0      | 0:00.54                  |
| 371 | TRUE   | 1      | 1     | 0      | 0:00.54                  |
| 372 | TRUE   | 1      | 1     | 0      | 0:00.55                  |
| 373 | TRUE   | 1      | 1     | 0      | 0:00.54                  |
| 374 | TRUE   | 1      | 1     | 0      | 0:00.55                  |
| 375 | TRUE   | 1      | 1     | 0      | 0:00.53                  |
| 376 | TRUE   | 1      | 1     | 0      | 0:00.53                  |
| 377 | TRUE   | 1      | 1     | 0      | 0:00.54                  |
| 378 | TRUE   | 1      | 1     | 0      | 0:00.54                  |
| 379 | TRUE   | 1      | 1     | 0      | 0:00.54                  |
| 380 | TRUE   | 1      | 1     | 0      | 0:00.54                  |
| 381 | TRUE   | 1      | 1     | 0      | 0:00.54                  |
| 382 | TRUE   | 1      | 1     | 0      | 0:00.54                  |

| <b>Id</b> | <b>Result</b> | <b>#total</b> | <b>#true</b> | <b>#false</b> | <b>Execution time (min:sec)</b> |
|-----------|---------------|---------------|--------------|---------------|---------------------------------|
| 383       | TRUE          | 1             | 1            | 0             | 0:00.55                         |
| 384       | TRUE          | 1             | 1            | 0             | 0:00.53                         |
| 385       | TRUE          | 1             | 1            | 0             | 0:00.53                         |
| 386       | TRUE          | 1             | 1            | 0             | 0:00.53                         |
| 387       | TRUE          | 1             | 1            | 0             | 0:00.53                         |
| 388       | TRUE          | 1             | 1            | 0             | 0:00.54                         |
| 389       | TRUE          | 1             | 1            | 0             | 0:00.54                         |
| 390       | TRUE          | 1             | 1            | 0             | 0:00.54                         |
| 391       | TRUE          | 1             | 1            | 0             | 0:00.54                         |
| 392       | TRUE          | 1             | 1            | 0             | 0:00.54                         |
| 393       | TRUE          | 1             | 1            | 0             | 0:00.54                         |
| 394       | TRUE          | 1             | 1            | 0             | 0:00.53                         |
| 395       | TRUE          | 1             | 1            | 0             | 0:00.53                         |
| 396       | TRUE          | 1             | 1            | 0             | 0:00.54                         |
| 397       | TRUE          | 1             | 1            | 0             | 0:00.55                         |
| 398       | TRUE          | 1             | 1            | 0             | 0:00.55                         |
| 399       | TRUE          | 1             | 1            | 0             | 0:00.54                         |
| 400       | TRUE          | 1             | 1            | 0             | 0:00.55                         |
| 401       | TRUE          | 1             | 1            | 0             | 0:00.55                         |
| 402       | TRUE          | 1             | 1            | 0             | 0:00.54                         |
| 403       | TRUE          | 1             | 1            | 0             | 0:00.53                         |
| 404       | TRUE          | 1             | 1            | 0             | 0:00.54                         |
| 405       | TRUE          | 1             | 1            | 0             | 0:00.57                         |
| 406       | TRUE          | 1             | 1            | 0             | 0:00.55                         |
| 407       | TRUE          | 1             | 1            | 0             | 0:00.53                         |
| 408       | TRUE          | 1             | 1            | 0             | 0:00.54                         |
| 409       | TRUE          | 1             | 1            | 0             | 0:00.54                         |
| 410       | TRUE          | 1             | 1            | 0             | 0:00.57                         |
| 411       | TRUE          | 1             | 1            | 0             | 0:00.54                         |
| 412       | TRUE          | 1             | 1            | 0             | 0:00.53                         |
| 413       | TRUE          | 1             | 1            | 0             | 0:00.54                         |
| 414       | TRUE          | 1             | 1            | 0             | 0:00.54                         |
| 415       | TRUE          | 1             | 1            | 0             | 0:00.54                         |
| 416       | TRUE          | 1             | 1            | 0             | 0:00.54                         |
| 417       | TRUE          | 1             | 1            | 0             | 0:00.53                         |
| 418       | TRUE          | 1             | 1            | 0             | 0:00.53                         |
| 419       | TRUE          | 1             | 1            | 0             | 0:00.54                         |
| 420       | TRUE          | 1             | 1            | 0             | 0:00.54                         |
| 421       | TRUE          | 1             | 1            | 0             | 0:00.53                         |
| 422       | TRUE          | 1             | 1            | 0             | 0:00.54                         |
| 423       | TRUE          | 1             | 1            | 0             | 0:00.53                         |
| 424       | TRUE          | 1             | 1            | 0             | 0:00.54                         |
| 425       | TRUE          | 1             | 1            | 0             | 0:00.54                         |
| 426       | TRUE          | 1             | 1            | 0             | 0:00.54                         |
| 427       | TRUE          | 1             | 1            | 0             | 0:00.52                         |
| 428       | TRUE          | 1             | 1            | 0             | 0:00.54                         |
| 429       | TRUE          | 1             | 1            | 0             | 0:00.54                         |
| 430       | TRUE          | 1             | 1            | 0             | 0:00.54                         |

| <b>Id</b> | <b>Result</b> | <b>#total</b> | <b>#true</b> | <b>#false</b> | <b>Execution time (min:sec)</b> |
|-----------|---------------|---------------|--------------|---------------|---------------------------------|
| 431       | TRUE          | 1             | 1            | 0             | 0:00.53                         |
| 432       | TRUE          | 1             | 1            | 0             | 0:00.53                         |
| 433       | TRUE          | 1             | 1            | 0             | 0:00.54                         |
| 434       | TRUE          | 1             | 1            | 0             | 0:00.54                         |
| 435       | TRUE          | 1             | 1            | 0             | 0:00.54                         |
| 436       | TRUE          | 1             | 1            | 0             | 0:00.54                         |
| 437       | TRUE          | 1             | 1            | 0             | 0:00.55                         |
| 438       | TRUE          | 1             | 1            | 0             | 0:00.53                         |
| 439       | TRUE          | 1             | 1            | 0             | 0:00.54                         |
| 440       | TRUE          | 1             | 1            | 0             | 0:00.54                         |
| 441       | TRUE          | 1             | 1            | 0             | 0:00.54                         |
| 442       | TRUE          | 1             | 1            | 0             | 0:00.54                         |
| 443       | TRUE          | 1             | 1            | 0             | 0:00.54                         |
| 444       | TRUE          | 1             | 1            | 0             | 0:00.55                         |
| 445       | TRUE          | 1             | 1            | 0             | 0:00.53                         |
| 446       | TRUE          | 1             | 1            | 0             | 0:00.55                         |
| 447       | TRUE          | 1             | 1            | 0             | 0:00.54                         |
| 448       | TRUE          | 1             | 1            | 0             | 0:00.54                         |
| 449       | TRUE          | 1             | 1            | 0             | 0:00.56                         |
| 450       | TRUE          | 1             | 1            | 0             | 0:00.54                         |
| 451       | TRUE          | 1             | 1            | 0             | 0:00.54                         |
| 452       | TRUE          | 1             | 1            | 0             | 0:00.54                         |
| 453       | TRUE          | 1             | 1            | 0             | 0:00.54                         |
| 454       | TRUE          | 1             | 1            | 0             | 0:00.54                         |
| 455       | TRUE          | 1             | 1            | 0             | 0:00.52                         |
| 456       | TRUE          | 1             | 1            | 0             | 0:00.54                         |
| 457       | TRUE          | 1             | 1            | 0             | 0:00.54                         |
| 458       | TRUE          | 1             | 1            | 0             | 0:00.54                         |
| 459       | TRUE          | 1             | 1            | 0             | 0:00.54                         |
| 460       | TRUE          | 1             | 1            | 0             | 0:00.55                         |
| 461       | TRUE          | 1             | 1            | 0             | 0:00.54                         |
| 462       | TRUE          | 1             | 1            | 0             | 0:00.54                         |
| 463       | TRUE          | 1             | 1            | 0             | 0:00.54                         |
| 464       | TRUE          | 1             | 1            | 0             | 0:00.54                         |
| 465       | TRUE          | 1             | 1            | 0             | 0:00.55                         |
| 466       | TRUE          | 1             | 1            | 0             | 0:00.54                         |
| 467       | TRUE          | 1             | 1            | 0             | 0:00.54                         |
| 468       | TRUE          | 1             | 1            | 0             | 0:00.54                         |
| 469       | TRUE          | 1             | 1            | 0             | 0:00.54                         |
| 470       | TRUE          | 1             | 1            | 0             | 0:00.54                         |
| 471       | TRUE          | 1             | 1            | 0             | 0:00.54                         |
| 472       | TRUE          | 1             | 1            | 0             | 0:00.54                         |
| 473       | TRUE          | 1             | 1            | 0             | 0:00.53                         |
| 474       | TRUE          | 1             | 1            | 0             | 0:00.54                         |
| 475       | TRUE          | 1             | 1            | 0             | 0:00.54                         |
| 476       | TRUE          | 1             | 1            | 0             | 0:00.54                         |
| 477       | TRUE          | 1             | 1            | 0             | 0:00.54                         |
| 478       | TRUE          | 1             | 1            | 0             | 0:00.54                         |

| <b>Id</b> | <b>Result</b> | <b>#total</b> | <b>#true</b> | <b>#false</b> | <b>Execution time (min:sec)</b> |
|-----------|---------------|---------------|--------------|---------------|---------------------------------|
| 479       | TRUE          | 1             | 1            | 0             | 0:00.54                         |
| 480       | TRUE          | 1             | 1            | 0             | 0:00.55                         |
| 481       | TRUE          | 1             | 1            | 0             | 0:00.54                         |
| 482       | TRUE          | 1             | 1            | 0             | 0:00.55                         |
| 483       | TRUE          | 1             | 1            | 0             | 0:00.53                         |
| 484       | TRUE          | 1             | 1            | 0             | 0:00.54                         |
| 485       | TRUE          | 1             | 1            | 0             | 0:00.54                         |
| 486       | TRUE          | 1             | 1            | 0             | 0:00.54                         |
| 487       | TRUE          | 1             | 1            | 0             | 0:00.54                         |
| 488       | TRUE          | 1             | 1            | 0             | 0:00.54                         |
| 489       | TRUE          | 1             | 1            | 0             | 0:00.54                         |
| 490       | TRUE          | 1             | 1            | 0             | 0:00.56                         |
| 491       | TRUE          | 1             | 1            | 0             | 0:00.54                         |
| 492       | TRUE          | 1             | 1            | 0             | 0:00.54                         |
| 493       | TRUE          | 1             | 1            | 0             | 0:00.54                         |
| 494       | TRUE          | 1             | 1            | 0             | 0:00.55                         |
| 495       | TRUE          | 1             | 1            | 0             | 0:00.54                         |
| 496       | TRUE          | 1             | 1            | 0             | 0:00.54                         |
| 497       | TRUE          | 1             | 1            | 0             | 0:00.54                         |
| 498       | TRUE          | 1             | 1            | 0             | 0:00.54                         |
| 499       | TRUE          | 1             | 1            | 0             | 0:00.55                         |
| 500       | TRUE          | 1             | 1            | 0             | 0:00.54                         |

Table 2: Model checking results corresponding to PBLMSTL statement 5

| <b>Id</b> | <b>Result</b> | <b>#total</b> | <b>#true</b> | <b>#false</b> | <b>Execution time (min:sec)</b> |
|-----------|---------------|---------------|--------------|---------------|---------------------------------|
| 1         | TRUE          | 1             | 0            | 1             | 0:00.53                         |
| 2         | TRUE          | 1             | 0            | 1             | 0:00.53                         |
| 3         | TRUE          | 1             | 0            | 1             | 0:00.54                         |
| 4         | TRUE          | 1             | 0            | 1             | 0:00.53                         |
| 5         | TRUE          | 1             | 0            | 1             | 0:00.54                         |
| 6         | TRUE          | 1             | 0            | 1             | 0:00.54                         |
| 7         | TRUE          | 1             | 0            | 1             | 0:00.54                         |
| 8         | TRUE          | 1             | 0            | 1             | 0:00.54                         |
| 9         | TRUE          | 1             | 0            | 1             | 0:00.55                         |
| 10        | TRUE          | 1             | 0            | 1             | 0:00.54                         |
| 11        | TRUE          | 1             | 0            | 1             | 0:00.53                         |
| 12        | TRUE          | 1             | 0            | 1             | 0:00.54                         |
| 13        | TRUE          | 1             | 0            | 1             | 0:00.54                         |
| 14        | TRUE          | 1             | 0            | 1             | 0:00.54                         |
| 15        | TRUE          | 1             | 0            | 1             | 0:00.53                         |
| 16        | TRUE          | 1             | 0            | 1             | 0:00.54                         |
| 17        | TRUE          | 1             | 0            | 1             | 0:00.54                         |
| 18        | TRUE          | 1             | 0            | 1             | 0:00.53                         |
| 19        | TRUE          | 1             | 0            | 1             | 0:00.52                         |

| Id | Result | #total | #true | #false | Execution time (min:sec) |
|----|--------|--------|-------|--------|--------------------------|
| 20 | TRUE   | 1      | 0     | 1      | 0:00.53                  |
| 21 | TRUE   | 1      | 0     | 1      | 0:00.54                  |
| 22 | TRUE   | 1      | 0     | 1      | 0:00.52                  |
| 23 | TRUE   | 1      | 0     | 1      | 0:00.53                  |
| 24 | TRUE   | 1      | 0     | 1      | 0:00.54                  |
| 25 | TRUE   | 1      | 0     | 1      | 0:00.53                  |
| 26 | TRUE   | 1      | 0     | 1      | 0:00.53                  |
| 27 | TRUE   | 1      | 0     | 1      | 0:00.54                  |
| 28 | TRUE   | 1      | 0     | 1      | 0:00.52                  |
| 29 | TRUE   | 1      | 0     | 1      | 0:00.54                  |
| 30 | TRUE   | 1      | 0     | 1      | 0:00.53                  |
| 31 | TRUE   | 1      | 0     | 1      | 0:00.54                  |
| 32 | TRUE   | 1      | 0     | 1      | 0:00.52                  |
| 33 | TRUE   | 1      | 0     | 1      | 0:00.53                  |
| 34 | TRUE   | 1      | 0     | 1      | 0:00.53                  |
| 35 | TRUE   | 1      | 0     | 1      | 0:00.53                  |
| 36 | TRUE   | 1      | 0     | 1      | 0:00.54                  |
| 37 | TRUE   | 1      | 0     | 1      | 0:00.53                  |
| 38 | TRUE   | 1      | 0     | 1      | 0:00.54                  |
| 39 | TRUE   | 1      | 0     | 1      | 0:00.54                  |
| 40 | TRUE   | 1      | 0     | 1      | 0:00.54                  |
| 41 | TRUE   | 1      | 0     | 1      | 0:00.55                  |
| 42 | TRUE   | 1      | 0     | 1      | 0:00.54                  |
| 43 | TRUE   | 1      | 0     | 1      | 0:00.53                  |
| 44 | TRUE   | 1      | 0     | 1      | 0:00.54                  |
| 45 | TRUE   | 1      | 0     | 1      | 0:00.53                  |
| 46 | TRUE   | 1      | 0     | 1      | 0:00.54                  |
| 47 | TRUE   | 1      | 0     | 1      | 0:00.54                  |
| 48 | TRUE   | 1      | 0     | 1      | 0:00.53                  |
| 49 | TRUE   | 1      | 0     | 1      | 0:00.55                  |
| 50 | TRUE   | 1      | 0     | 1      | 0:00.54                  |
| 51 | TRUE   | 1      | 0     | 1      | 0:00.54                  |
| 52 | TRUE   | 1      | 0     | 1      | 0:00.54                  |
| 53 | TRUE   | 1      | 0     | 1      | 0:00.54                  |
| 54 | TRUE   | 1      | 0     | 1      | 0:00.54                  |
| 55 | TRUE   | 1      | 0     | 1      | 0:00.54                  |
| 56 | TRUE   | 1      | 0     | 1      | 0:00.54                  |
| 57 | TRUE   | 1      | 0     | 1      | 0:00.53                  |
| 58 | TRUE   | 1      | 0     | 1      | 0:00.54                  |
| 59 | TRUE   | 1      | 0     | 1      | 0:00.54                  |
| 60 | TRUE   | 1      | 0     | 1      | 0:00.54                  |
| 61 | TRUE   | 1      | 0     | 1      | 0:00.54                  |
| 62 | TRUE   | 1      | 0     | 1      | 0:00.54                  |
| 63 | TRUE   | 1      | 0     | 1      | 0:00.54                  |
| 64 | TRUE   | 1      | 0     | 1      | 0:00.53                  |
| 65 | TRUE   | 1      | 0     | 1      | 0:00.53                  |
| 66 | TRUE   | 1      | 0     | 1      | 0:00.54                  |
| 67 | TRUE   | 1      | 0     | 1      | 0:00.54                  |

| <b>Id</b> | <b>Result</b> | <b>#total</b> | <b>#true</b> | <b>#false</b> | <b>Execution time (min:sec)</b> |
|-----------|---------------|---------------|--------------|---------------|---------------------------------|
| 68        | TRUE          | 1             | 0            | 1             | 0:00.54                         |
| 69        | TRUE          | 1             | 0            | 1             | 0:00.53                         |
| 70        | TRUE          | 1             | 0            | 1             | 0:00.54                         |
| 71        | TRUE          | 1             | 0            | 1             | 0:00.55                         |
| 72        | TRUE          | 1             | 0            | 1             | 0:00.54                         |
| 73        | TRUE          | 1             | 0            | 1             | 0:00.54                         |
| 74        | TRUE          | 1             | 0            | 1             | 0:00.54                         |
| 75        | TRUE          | 1             | 0            | 1             | 0:00.54                         |
| 76        | TRUE          | 1             | 0            | 1             | 0:00.55                         |
| 77        | TRUE          | 1             | 0            | 1             | 0:00.54                         |
| 78        | TRUE          | 1             | 0            | 1             | 0:00.54                         |
| 79        | TRUE          | 1             | 0            | 1             | 0:00.54                         |
| 80        | TRUE          | 1             | 0            | 1             | 0:00.52                         |
| 81        | TRUE          | 1             | 0            | 1             | 0:00.53                         |
| 82        | TRUE          | 1             | 0            | 1             | 0:00.53                         |
| 83        | TRUE          | 1             | 0            | 1             | 0:00.54                         |
| 84        | TRUE          | 1             | 0            | 1             | 0:00.54                         |
| 85        | TRUE          | 1             | 0            | 1             | 0:00.54                         |
| 86        | TRUE          | 1             | 0            | 1             | 0:00.54                         |
| 87        | TRUE          | 1             | 0            | 1             | 0:00.54                         |
| 88        | TRUE          | 1             | 0            | 1             | 0:00.54                         |
| 89        | TRUE          | 1             | 0            | 1             | 0:00.54                         |
| 90        | TRUE          | 1             | 0            | 1             | 0:00.54                         |
| 91        | TRUE          | 1             | 0            | 1             | 0:00.54                         |
| 92        | TRUE          | 1             | 0            | 1             | 0:00.53                         |
| 93        | TRUE          | 1             | 0            | 1             | 0:00.53                         |
| 94        | TRUE          | 1             | 0            | 1             | 0:00.54                         |
| 95        | TRUE          | 1             | 0            | 1             | 0:00.54                         |
| 96        | TRUE          | 1             | 0            | 1             | 0:00.54                         |
| 97        | TRUE          | 1             | 0            | 1             | 0:00.54                         |
| 98        | TRUE          | 1             | 0            | 1             | 0:00.54                         |
| 99        | TRUE          | 1             | 0            | 1             | 0:00.55                         |
| 100       | TRUE          | 1             | 0            | 1             | 0:00.54                         |
| 101       | TRUE          | 1             | 0            | 1             | 0:00.54                         |
| 102       | TRUE          | 1             | 0            | 1             | 0:00.53                         |
| 103       | TRUE          | 1             | 0            | 1             | 0:00.55                         |
| 104       | TRUE          | 1             | 0            | 1             | 0:00.54                         |
| 105       | TRUE          | 1             | 0            | 1             | 0:00.54                         |
| 106       | TRUE          | 1             | 0            | 1             | 0:00.54                         |
| 107       | TRUE          | 1             | 0            | 1             | 0:00.54                         |
| 108       | TRUE          | 1             | 0            | 1             | 0:00.54                         |
| 109       | TRUE          | 1             | 0            | 1             | 0:00.54                         |
| 110       | TRUE          | 1             | 0            | 1             | 0:00.54                         |
| 111       | TRUE          | 1             | 0            | 1             | 0:00.54                         |
| 112       | TRUE          | 1             | 0            | 1             | 0:00.54                         |
| 113       | TRUE          | 1             | 0            | 1             | 0:00.54                         |
| 114       | TRUE          | 1             | 0            | 1             | 0:00.54                         |
| 115       | TRUE          | 1             | 0            | 1             | 0:00.53                         |

| <b>Id</b> | <b>Result</b> | <b>#total</b> | <b>#true</b> | <b>#false</b> | <b>Execution time (min:sec)</b> |
|-----------|---------------|---------------|--------------|---------------|---------------------------------|
| 116       | TRUE          | 1             | 0            | 1             | 0:00.54                         |
| 117       | TRUE          | 1             | 0            | 1             | 0:00.54                         |
| 118       | TRUE          | 1             | 0            | 1             | 0:00.55                         |
| 119       | TRUE          | 1             | 0            | 1             | 0:00.54                         |
| 120       | TRUE          | 1             | 0            | 1             | 0:00.54                         |
| 121       | TRUE          | 1             | 0            | 1             | 0:00.54                         |
| 122       | TRUE          | 1             | 0            | 1             | 0:00.54                         |
| 123       | TRUE          | 1             | 0            | 1             | 0:00.53                         |
| 124       | TRUE          | 1             | 0            | 1             | 0:00.55                         |
| 125       | TRUE          | 1             | 0            | 1             | 0:00.54                         |
| 126       | TRUE          | 1             | 0            | 1             | 0:00.55                         |
| 127       | TRUE          | 1             | 0            | 1             | 0:00.54                         |
| 128       | TRUE          | 1             | 0            | 1             | 0:00.54                         |
| 129       | TRUE          | 1             | 0            | 1             | 0:00.53                         |
| 130       | TRUE          | 1             | 0            | 1             | 0:00.55                         |
| 131       | TRUE          | 1             | 0            | 1             | 0:00.54                         |
| 132       | TRUE          | 1             | 0            | 1             | 0:00.53                         |
| 133       | TRUE          | 1             | 0            | 1             | 0:00.55                         |
| 134       | TRUE          | 1             | 0            | 1             | 0:00.54                         |
| 135       | TRUE          | 1             | 0            | 1             | 0:00.53                         |
| 136       | TRUE          | 1             | 0            | 1             | 0:00.54                         |
| 137       | TRUE          | 1             | 0            | 1             | 0:00.54                         |
| 138       | TRUE          | 1             | 0            | 1             | 0:00.54                         |
| 139       | TRUE          | 1             | 0            | 1             | 0:00.54                         |
| 140       | TRUE          | 1             | 0            | 1             | 0:00.53                         |
| 141       | TRUE          | 1             | 0            | 1             | 0:00.54                         |
| 142       | TRUE          | 1             | 0            | 1             | 0:00.56                         |
| 143       | TRUE          | 1             | 0            | 1             | 0:00.55                         |
| 144       | TRUE          | 1             | 0            | 1             | 0:00.54                         |
| 145       | TRUE          | 1             | 0            | 1             | 0:00.54                         |
| 146       | TRUE          | 1             | 0            | 1             | 0:00.53                         |
| 147       | TRUE          | 1             | 0            | 1             | 0:00.54                         |
| 148       | TRUE          | 1             | 0            | 1             | 0:00.54                         |
| 149       | TRUE          | 1             | 0            | 1             | 0:00.53                         |
| 150       | TRUE          | 1             | 0            | 1             | 0:00.52                         |
| 151       | TRUE          | 1             | 0            | 1             | 0:00.54                         |
| 152       | TRUE          | 1             | 0            | 1             | 0:00.54                         |
| 153       | TRUE          | 1             | 0            | 1             | 0:00.53                         |
| 154       | TRUE          | 1             | 0            | 1             | 0:00.54                         |
| 155       | TRUE          | 1             | 0            | 1             | 0:00.54                         |
| 156       | TRUE          | 1             | 0            | 1             | 0:00.54                         |
| 157       | TRUE          | 1             | 0            | 1             | 0:00.54                         |
| 158       | TRUE          | 1             | 0            | 1             | 0:00.53                         |
| 159       | TRUE          | 1             | 0            | 1             | 0:00.55                         |
| 160       | TRUE          | 1             | 0            | 1             | 0:00.53                         |
| 161       | TRUE          | 1             | 0            | 1             | 0:00.55                         |
| 162       | TRUE          | 1             | 0            | 1             | 0:00.54                         |
| 163       | TRUE          | 1             | 0            | 1             | 0:00.54                         |

| <b>Id</b> | <b>Result</b> | <b>#total</b> | <b>#true</b> | <b>#false</b> | <b>Execution time (min:sec)</b> |
|-----------|---------------|---------------|--------------|---------------|---------------------------------|
| 164       | TRUE          | 1             | 0            | 1             | 0:00.54                         |
| 165       | TRUE          | 1             | 0            | 1             | 0:00.53                         |
| 166       | TRUE          | 1             | 0            | 1             | 0:00.52                         |
| 167       | TRUE          | 1             | 0            | 1             | 0:00.54                         |
| 168       | TRUE          | 1             | 0            | 1             | 0:00.53                         |
| 169       | TRUE          | 1             | 0            | 1             | 0:00.54                         |
| 170       | TRUE          | 1             | 0            | 1             | 0:00.54                         |
| 171       | TRUE          | 1             | 0            | 1             | 0:00.54                         |
| 172       | TRUE          | 1             | 0            | 1             | 0:00.54                         |
| 173       | TRUE          | 1             | 0            | 1             | 0:00.53                         |
| 174       | TRUE          | 1             | 0            | 1             | 0:00.53                         |
| 175       | TRUE          | 1             | 0            | 1             | 0:00.54                         |
| 176       | TRUE          | 1             | 0            | 1             | 0:00.53                         |
| 177       | TRUE          | 1             | 0            | 1             | 0:00.54                         |
| 178       | TRUE          | 1             | 0            | 1             | 0:00.53                         |
| 179       | TRUE          | 1             | 0            | 1             | 0:00.53                         |
| 180       | TRUE          | 1             | 0            | 1             | 0:00.53                         |
| 181       | TRUE          | 1             | 0            | 1             | 0:00.54                         |
| 182       | TRUE          | 1             | 0            | 1             | 0:00.53                         |
| 183       | TRUE          | 1             | 0            | 1             | 0:00.53                         |
| 184       | TRUE          | 1             | 0            | 1             | 0:00.54                         |
| 185       | TRUE          | 1             | 0            | 1             | 0:00.53                         |
| 186       | TRUE          | 1             | 0            | 1             | 0:00.53                         |
| 187       | TRUE          | 1             | 0            | 1             | 0:00.54                         |
| 188       | TRUE          | 1             | 0            | 1             | 0:00.53                         |
| 189       | TRUE          | 1             | 0            | 1             | 0:00.54                         |
| 190       | TRUE          | 1             | 0            | 1             | 0:00.54                         |
| 191       | TRUE          | 1             | 0            | 1             | 0:00.53                         |
| 192       | TRUE          | 1             | 0            | 1             | 0:00.53                         |
| 193       | TRUE          | 1             | 0            | 1             | 0:00.55                         |
| 194       | TRUE          | 1             | 0            | 1             | 0:00.54                         |
| 195       | TRUE          | 1             | 0            | 1             | 0:00.54                         |
| 196       | TRUE          | 1             | 0            | 1             | 0:00.53                         |
| 197       | TRUE          | 1             | 0            | 1             | 0:00.54                         |
| 198       | TRUE          | 1             | 0            | 1             | 0:00.53                         |
| 199       | TRUE          | 1             | 0            | 1             | 0:00.54                         |
| 200       | TRUE          | 1             | 0            | 1             | 0:00.54                         |
| 201       | TRUE          | 1             | 0            | 1             | 0:00.53                         |
| 202       | TRUE          | 1             | 0            | 1             | 0:00.53                         |
| 203       | TRUE          | 1             | 0            | 1             | 0:00.53                         |
| 204       | TRUE          | 1             | 0            | 1             | 0:00.54                         |
| 205       | TRUE          | 1             | 0            | 1             | 0:00.54                         |
| 206       | TRUE          | 1             | 0            | 1             | 0:00.54                         |
| 207       | TRUE          | 1             | 0            | 1             | 0:00.54                         |
| 208       | TRUE          | 1             | 0            | 1             | 0:00.54                         |
| 209       | TRUE          | 1             | 0            | 1             | 0:00.54                         |
| 210       | TRUE          | 1             | 0            | 1             | 0:00.54                         |
| 211       | TRUE          | 1             | 0            | 1             | 0:00.54                         |



| <b>Id</b> | <b>Result</b> | <b>#total</b> | <b>#true</b> | <b>#false</b> | <b>Execution time (min:sec)</b> |
|-----------|---------------|---------------|--------------|---------------|---------------------------------|
| 212       | TRUE          | 1             | 0            | 1             | 0:00.54                         |
| 213       | TRUE          | 1             | 0            | 1             | 0:00.54                         |
| 214       | TRUE          | 1             | 0            | 1             | 0:00.53                         |
| 215       | TRUE          | 1             | 0            | 1             | 0:00.54                         |
| 216       | TRUE          | 1             | 0            | 1             | 0:00.52                         |
| 217       | TRUE          | 1             | 0            | 1             | 0:00.55                         |
| 218       | TRUE          | 1             | 0            | 1             | 0:00.54                         |
| 219       | TRUE          | 1             | 0            | 1             | 0:00.54                         |
| 220       | TRUE          | 1             | 0            | 1             | 0:00.54                         |
| 221       | TRUE          | 1             | 0            | 1             | 0:00.54                         |
| 222       | TRUE          | 1             | 0            | 1             | 0:00.54                         |
| 223       | TRUE          | 1             | 0            | 1             | 0:00.54                         |
| 224       | TRUE          | 1             | 0            | 1             | 0:00.54                         |
| 225       | TRUE          | 1             | 0            | 1             | 0:00.54                         |
| 226       | TRUE          | 1             | 0            | 1             | 0:00.52                         |
| 227       | TRUE          | 1             | 0            | 1             | 0:00.54                         |
| 228       | TRUE          | 1             | 0            | 1             | 0:00.55                         |
| 229       | TRUE          | 1             | 0            | 1             | 0:00.55                         |
| 230       | TRUE          | 1             | 0            | 1             | 0:00.54                         |
| 231       | TRUE          | 1             | 0            | 1             | 0:00.55                         |
| 232       | TRUE          | 1             | 0            | 1             | 0:00.54                         |
| 233       | TRUE          | 1             | 0            | 1             | 0:00.54                         |
| 234       | TRUE          | 1             | 0            | 1             | 0:00.53                         |
| 235       | TRUE          | 1             | 0            | 1             | 0:00.54                         |
| 236       | TRUE          | 1             | 0            | 1             | 0:00.54                         |
| 237       | TRUE          | 1             | 0            | 1             | 0:00.54                         |
| 238       | TRUE          | 1             | 0            | 1             | 0:00.54                         |
| 239       | TRUE          | 1             | 0            | 1             | 0:00.53                         |
| 240       | TRUE          | 1             | 0            | 1             | 0:00.54                         |
| 241       | TRUE          | 1             | 0            | 1             | 0:00.53                         |
| 242       | TRUE          | 1             | 0            | 1             | 0:00.53                         |
| 243       | TRUE          | 1             | 0            | 1             | 0:00.53                         |
| 244       | TRUE          | 1             | 0            | 1             | 0:00.54                         |
| 245       | TRUE          | 1             | 0            | 1             | 0:00.55                         |
| 246       | TRUE          | 1             | 0            | 1             | 0:00.54                         |
| 247       | TRUE          | 1             | 0            | 1             | 0:00.54                         |
| 248       | TRUE          | 1             | 0            | 1             | 0:00.53                         |
| 249       | TRUE          | 1             | 0            | 1             | 0:00.54                         |
| 250       | TRUE          | 1             | 0            | 1             | 0:00.54                         |
| 251       | TRUE          | 1             | 0            | 1             | 0:00.54                         |
| 252       | TRUE          | 1             | 0            | 1             | 0:00.53                         |
| 253       | TRUE          | 1             | 0            | 1             | 0:00.53                         |
| 254       | TRUE          | 1             | 0            | 1             | 0:00.52                         |
| 255       | TRUE          | 1             | 0            | 1             | 0:00.54                         |
| 256       | TRUE          | 1             | 0            | 1             | 0:00.53                         |
| 257       | TRUE          | 1             | 0            | 1             | 0:00.53                         |
| 258       | TRUE          | 1             | 0            | 1             | 0:00.54                         |
| 259       | TRUE          | 1             | 0            | 1             | 0:00.53                         |

| <b>Id</b> | <b>Result</b> | <b>#total</b> | <b>#true</b> | <b>#false</b> | <b>Execution time (min:sec)</b> |
|-----------|---------------|---------------|--------------|---------------|---------------------------------|
| 260       | TRUE          | 1             | 0            | 1             | 0:00.55                         |
| 261       | TRUE          | 1             | 0            | 1             | 0:00.54                         |
| 262       | TRUE          | 1             | 0            | 1             | 0:00.54                         |
| 263       | TRUE          | 1             | 0            | 1             | 0:00.54                         |
| 264       | TRUE          | 1             | 0            | 1             | 0:00.54                         |
| 265       | TRUE          | 1             | 0            | 1             | 0:00.52                         |
| 266       | TRUE          | 1             | 0            | 1             | 0:00.53                         |
| 267       | TRUE          | 1             | 0            | 1             | 0:00.54                         |
| 268       | TRUE          | 1             | 0            | 1             | 0:00.54                         |
| 269       | TRUE          | 1             | 0            | 1             | 0:00.54                         |
| 270       | TRUE          | 1             | 0            | 1             | 0:00.52                         |
| 271       | TRUE          | 1             | 0            | 1             | 0:00.54                         |
| 272       | TRUE          | 1             | 0            | 1             | 0:00.54                         |
| 273       | TRUE          | 1             | 0            | 1             | 0:00.54                         |
| 274       | TRUE          | 1             | 0            | 1             | 0:00.54                         |
| 275       | TRUE          | 1             | 0            | 1             | 0:00.54                         |
| 276       | TRUE          | 1             | 0            | 1             | 0:00.54                         |
| 277       | TRUE          | 1             | 0            | 1             | 0:00.54                         |
| 278       | TRUE          | 1             | 0            | 1             | 0:00.54                         |
| 279       | TRUE          | 1             | 0            | 1             | 0:00.54                         |
| 280       | TRUE          | 1             | 0            | 1             | 0:00.53                         |
| 281       | TRUE          | 1             | 0            | 1             | 0:00.55                         |
| 282       | TRUE          | 1             | 0            | 1             | 0:00.54                         |
| 283       | TRUE          | 1             | 0            | 1             | 0:00.54                         |
| 284       | TRUE          | 1             | 0            | 1             | 0:00.53                         |
| 285       | TRUE          | 1             | 0            | 1             | 0:00.53                         |
| 286       | TRUE          | 1             | 0            | 1             | 0:00.53                         |
| 287       | TRUE          | 1             | 0            | 1             | 0:00.53                         |
| 288       | TRUE          | 1             | 0            | 1             | 0:00.53                         |
| 289       | TRUE          | 1             | 0            | 1             | 0:00.54                         |
| 290       | TRUE          | 1             | 0            | 1             | 0:00.54                         |
| 291       | TRUE          | 1             | 0            | 1             | 0:00.54                         |
| 292       | TRUE          | 1             | 0            | 1             | 0:00.54                         |
| 293       | TRUE          | 1             | 0            | 1             | 0:00.54                         |
| 294       | TRUE          | 1             | 0            | 1             | 0:00.54                         |
| 295       | TRUE          | 1             | 0            | 1             | 0:00.54                         |
| 296       | TRUE          | 1             | 0            | 1             | 0:00.54                         |
| 297       | TRUE          | 1             | 0            | 1             | 0:00.53                         |
| 298       | TRUE          | 1             | 0            | 1             | 0:00.54                         |
| 299       | TRUE          | 1             | 0            | 1             | 0:00.53                         |
| 300       | TRUE          | 1             | 0            | 1             | 0:00.54                         |
| 301       | TRUE          | 1             | 0            | 1             | 0:00.53                         |
| 302       | TRUE          | 1             | 0            | 1             | 0:00.52                         |
| 303       | TRUE          | 1             | 0            | 1             | 0:00.54                         |
| 304       | TRUE          | 1             | 0            | 1             | 0:00.54                         |
| 305       | TRUE          | 1             | 0            | 1             | 0:00.54                         |
| 306       | TRUE          | 1             | 0            | 1             | 0:00.53                         |
| 307       | TRUE          | 1             | 0            | 1             | 0:00.54                         |

| <b>Id</b> | <b>Result</b> | <b>#total</b> | <b>#true</b> | <b>#false</b> | <b>Execution time (min:sec)</b> |
|-----------|---------------|---------------|--------------|---------------|---------------------------------|
| 308       | TRUE          | 1             | 0            | 1             | 0:00.54                         |
| 309       | TRUE          | 1             | 0            | 1             | 0:00.53                         |
| 310       | TRUE          | 1             | 0            | 1             | 0:00.54                         |
| 311       | TRUE          | 1             | 0            | 1             | 0:00.54                         |
| 312       | TRUE          | 1             | 0            | 1             | 0:00.53                         |
| 313       | TRUE          | 1             | 0            | 1             | 0:00.52                         |
| 314       | TRUE          | 1             | 0            | 1             | 0:00.55                         |
| 315       | TRUE          | 1             | 0            | 1             | 0:00.54                         |
| 316       | TRUE          | 1             | 0            | 1             | 0:00.54                         |
| 317       | TRUE          | 1             | 0            | 1             | 0:00.53                         |
| 318       | TRUE          | 1             | 0            | 1             | 0:00.54                         |
| 319       | TRUE          | 1             | 0            | 1             | 0:00.53                         |
| 320       | TRUE          | 1             | 0            | 1             | 0:00.54                         |
| 321       | TRUE          | 1             | 0            | 1             | 0:00.53                         |
| 322       | TRUE          | 1             | 0            | 1             | 0:00.54                         |
| 323       | TRUE          | 1             | 0            | 1             | 0:00.54                         |
| 324       | TRUE          | 1             | 0            | 1             | 0:00.54                         |
| 325       | TRUE          | 1             | 0            | 1             | 0:00.55                         |
| 326       | TRUE          | 1             | 0            | 1             | 0:00.54                         |
| 327       | TRUE          | 1             | 0            | 1             | 0:00.55                         |
| 328       | TRUE          | 1             | 0            | 1             | 0:00.54                         |
| 329       | TRUE          | 1             | 0            | 1             | 0:00.53                         |
| 330       | TRUE          | 1             | 0            | 1             | 0:00.54                         |
| 331       | TRUE          | 1             | 0            | 1             | 0:00.54                         |
| 332       | TRUE          | 1             | 0            | 1             | 0:00.54                         |
| 333       | TRUE          | 1             | 0            | 1             | 0:00.54                         |
| 334       | TRUE          | 1             | 0            | 1             | 0:00.54                         |
| 335       | TRUE          | 1             | 0            | 1             | 0:00.54                         |
| 336       | TRUE          | 1             | 0            | 1             | 0:00.54                         |
| 337       | TRUE          | 1             | 0            | 1             | 0:00.54                         |
| 338       | TRUE          | 1             | 0            | 1             | 0:00.54                         |
| 339       | TRUE          | 1             | 0            | 1             | 0:00.53                         |
| 340       | TRUE          | 1             | 0            | 1             | 0:00.54                         |
| 341       | TRUE          | 1             | 0            | 1             | 0:00.54                         |
| 342       | TRUE          | 1             | 0            | 1             | 0:00.53                         |
| 343       | TRUE          | 1             | 0            | 1             | 0:00.52                         |
| 344       | TRUE          | 1             | 0            | 1             | 0:00.54                         |
| 345       | TRUE          | 1             | 0            | 1             | 0:00.55                         |
| 346       | TRUE          | 1             | 0            | 1             | 0:00.54                         |
| 347       | TRUE          | 1             | 0            | 1             | 0:00.54                         |
| 348       | TRUE          | 1             | 0            | 1             | 0:00.53                         |
| 349       | TRUE          | 1             | 0            | 1             | 0:00.53                         |
| 350       | TRUE          | 1             | 0            | 1             | 0:00.54                         |
| 351       | TRUE          | 1             | 0            | 1             | 0:00.55                         |
| 352       | TRUE          | 1             | 0            | 1             | 0:00.54                         |
| 353       | TRUE          | 1             | 0            | 1             | 0:00.53                         |
| 354       | TRUE          | 1             | 0            | 1             | 0:00.54                         |
| 355       | TRUE          | 1             | 0            | 1             | 0:00.54                         |

| <b>Id</b> | <b>Result</b> | <b>#total</b> | <b>#true</b> | <b>#false</b> | <b>Execution time (min:sec)</b> |
|-----------|---------------|---------------|--------------|---------------|---------------------------------|
| 356       | TRUE          | 1             | 0            | 1             | 0:00.53                         |
| 357       | TRUE          | 1             | 0            | 1             | 0:00.54                         |
| 358       | TRUE          | 1             | 0            | 1             | 0:00.53                         |
| 359       | TRUE          | 1             | 0            | 1             | 0:00.53                         |
| 360       | TRUE          | 1             | 0            | 1             | 0:00.53                         |
| 361       | TRUE          | 1             | 0            | 1             | 0:00.53                         |
| 362       | TRUE          | 1             | 0            | 1             | 0:00.53                         |
| 363       | TRUE          | 1             | 0            | 1             | 0:00.54                         |
| 364       | TRUE          | 1             | 0            | 1             | 0:00.54                         |
| 365       | TRUE          | 1             | 0            | 1             | 0:00.55                         |
| 366       | TRUE          | 1             | 0            | 1             | 0:00.54                         |
| 367       | TRUE          | 1             | 0            | 1             | 0:00.54                         |
| 368       | TRUE          | 1             | 0            | 1             | 0:00.54                         |
| 369       | TRUE          | 1             | 0            | 1             | 0:00.52                         |
| 370       | TRUE          | 1             | 0            | 1             | 0:00.54                         |
| 371       | TRUE          | 1             | 0            | 1             | 0:00.54                         |
| 372       | TRUE          | 1             | 0            | 1             | 0:00.54                         |
| 373       | TRUE          | 1             | 0            | 1             | 0:00.53                         |
| 374       | TRUE          | 1             | 0            | 1             | 0:00.54                         |
| 375       | TRUE          | 1             | 0            | 1             | 0:00.54                         |
| 376       | TRUE          | 1             | 0            | 1             | 0:00.54                         |
| 377       | TRUE          | 1             | 0            | 1             | 0:00.54                         |
| 378       | TRUE          | 1             | 0            | 1             | 0:00.54                         |
| 379       | TRUE          | 1             | 0            | 1             | 0:00.54                         |
| 380       | TRUE          | 1             | 0            | 1             | 0:00.54                         |
| 381       | TRUE          | 1             | 0            | 1             | 0:00.54                         |
| 382       | TRUE          | 1             | 0            | 1             | 0:00.54                         |
| 383       | TRUE          | 1             | 0            | 1             | 0:00.54                         |
| 384       | TRUE          | 1             | 0            | 1             | 0:00.53                         |
| 385       | TRUE          | 1             | 0            | 1             | 0:00.54                         |
| 386       | TRUE          | 1             | 0            | 1             | 0:00.54                         |
| 387       | TRUE          | 1             | 0            | 1             | 0:00.53                         |
| 388       | TRUE          | 1             | 0            | 1             | 0:00.54                         |
| 389       | TRUE          | 1             | 0            | 1             | 0:00.53                         |
| 390       | TRUE          | 1             | 0            | 1             | 0:00.54                         |
| 391       | TRUE          | 1             | 0            | 1             | 0:00.55                         |
| 392       | TRUE          | 1             | 0            | 1             | 0:00.54                         |
| 393       | TRUE          | 1             | 0            | 1             | 0:00.54                         |
| 394       | TRUE          | 1             | 0            | 1             | 0:00.54                         |
| 395       | TRUE          | 1             | 0            | 1             | 0:00.54                         |
| 396       | TRUE          | 1             | 0            | 1             | 0:00.53                         |
| 397       | TRUE          | 1             | 0            | 1             | 0:00.54                         |
| 398       | TRUE          | 1             | 0            | 1             | 0:00.54                         |
| 399       | TRUE          | 1             | 0            | 1             | 0:00.53                         |
| 400       | TRUE          | 1             | 0            | 1             | 0:00.53                         |
| 401       | TRUE          | 1             | 0            | 1             | 0:00.54                         |
| 402       | TRUE          | 1             | 0            | 1             | 0:00.53                         |
| 403       | TRUE          | 1             | 0            | 1             | 0:00.54                         |

| <b>Id</b> | <b>Result</b> | <b>#total</b> | <b>#true</b> | <b>#false</b> | <b>Execution time (min:sec)</b> |
|-----------|---------------|---------------|--------------|---------------|---------------------------------|
| 404       | TRUE          | 1             | 0            | 1             | 0:00.53                         |
| 405       | TRUE          | 1             | 0            | 1             | 0:00.54                         |
| 406       | TRUE          | 1             | 0            | 1             | 0:00.54                         |
| 407       | TRUE          | 1             | 0            | 1             | 0:00.54                         |
| 408       | TRUE          | 1             | 0            | 1             | 0:00.54                         |
| 409       | TRUE          | 1             | 0            | 1             | 0:00.53                         |
| 410       | TRUE          | 1             | 0            | 1             | 0:00.54                         |
| 411       | TRUE          | 1             | 0            | 1             | 0:00.54                         |
| 412       | TRUE          | 1             | 0            | 1             | 0:00.53                         |
| 413       | TRUE          | 1             | 0            | 1             | 0:00.53                         |
| 414       | TRUE          | 1             | 0            | 1             | 0:00.54                         |
| 415       | TRUE          | 1             | 0            | 1             | 0:00.55                         |
| 416       | TRUE          | 1             | 0            | 1             | 0:00.54                         |
| 417       | TRUE          | 1             | 0            | 1             | 0:00.54                         |
| 418       | TRUE          | 1             | 0            | 1             | 0:00.54                         |
| 419       | TRUE          | 1             | 0            | 1             | 0:00.54                         |
| 420       | TRUE          | 1             | 0            | 1             | 0:00.54                         |
| 421       | TRUE          | 1             | 0            | 1             | 0:00.54                         |
| 422       | TRUE          | 1             | 0            | 1             | 0:00.54                         |
| 423       | TRUE          | 1             | 0            | 1             | 0:00.54                         |
| 424       | TRUE          | 1             | 0            | 1             | 0:00.55                         |
| 425       | TRUE          | 1             | 0            | 1             | 0:00.54                         |
| 426       | TRUE          | 1             | 0            | 1             | 0:00.53                         |
| 427       | TRUE          | 1             | 0            | 1             | 0:00.53                         |
| 428       | TRUE          | 1             | 0            | 1             | 0:00.54                         |
| 429       | TRUE          | 1             | 0            | 1             | 0:00.54                         |
| 430       | TRUE          | 1             | 0            | 1             | 0:00.54                         |
| 431       | TRUE          | 1             | 0            | 1             | 0:00.53                         |
| 432       | TRUE          | 1             | 0            | 1             | 0:00.53                         |
| 433       | TRUE          | 1             | 0            | 1             | 0:00.53                         |
| 434       | TRUE          | 1             | 0            | 1             | 0:00.53                         |
| 435       | TRUE          | 1             | 0            | 1             | 0:00.54                         |
| 436       | TRUE          | 1             | 0            | 1             | 0:00.53                         |
| 437       | TRUE          | 1             | 0            | 1             | 0:00.54                         |
| 438       | TRUE          | 1             | 0            | 1             | 0:00.54                         |
| 439       | TRUE          | 1             | 0            | 1             | 0:00.54                         |
| 440       | TRUE          | 1             | 0            | 1             | 0:00.52                         |
| 441       | TRUE          | 1             | 0            | 1             | 0:00.53                         |
| 442       | TRUE          | 1             | 0            | 1             | 0:00.54                         |
| 443       | TRUE          | 1             | 0            | 1             | 0:00.54                         |
| 444       | TRUE          | 1             | 0            | 1             | 0:00.54                         |
| 445       | TRUE          | 1             | 0            | 1             | 0:00.54                         |
| 446       | TRUE          | 1             | 0            | 1             | 0:00.54                         |
| 447       | TRUE          | 1             | 0            | 1             | 0:00.54                         |
| 448       | TRUE          | 1             | 0            | 1             | 0:00.55                         |
| 449       | TRUE          | 1             | 0            | 1             | 0:00.54                         |
| 450       | TRUE          | 1             | 0            | 1             | 0:00.53                         |
| 451       | TRUE          | 1             | 0            | 1             | 0:00.52                         |

| <b>Id</b> | <b>Result</b> | <b>#total</b> | <b>#true</b> | <b>#false</b> | <b>Execution time (min:sec)</b> |
|-----------|---------------|---------------|--------------|---------------|---------------------------------|
| 452       | TRUE          | 1             | 0            | 1             | 0:00.54                         |
| 453       | TRUE          | 1             | 0            | 1             | 0:00.53                         |
| 454       | TRUE          | 1             | 0            | 1             | 0:00.54                         |
| 455       | TRUE          | 1             | 0            | 1             | 0:00.52                         |
| 456       | TRUE          | 1             | 0            | 1             | 0:00.54                         |
| 457       | TRUE          | 1             | 0            | 1             | 0:00.54                         |
| 458       | TRUE          | 1             | 0            | 1             | 0:00.53                         |
| 459       | TRUE          | 1             | 0            | 1             | 0:00.53                         |
| 460       | TRUE          | 1             | 0            | 1             | 0:00.53                         |
| 461       | TRUE          | 1             | 0            | 1             | 0:00.54                         |
| 462       | TRUE          | 1             | 0            | 1             | 0:00.54                         |
| 463       | TRUE          | 1             | 0            | 1             | 0:00.54                         |
| 464       | TRUE          | 1             | 0            | 1             | 0:00.54                         |
| 465       | TRUE          | 1             | 0            | 1             | 0:00.54                         |
| 466       | TRUE          | 1             | 0            | 1             | 0:00.54                         |
| 467       | TRUE          | 1             | 0            | 1             | 0:00.53                         |
| 468       | TRUE          | 1             | 0            | 1             | 0:00.54                         |
| 469       | TRUE          | 1             | 0            | 1             | 0:00.54                         |
| 470       | TRUE          | 1             | 0            | 1             | 0:00.54                         |
| 471       | TRUE          | 1             | 0            | 1             | 0:00.54                         |
| 472       | TRUE          | 1             | 0            | 1             | 0:00.55                         |
| 473       | TRUE          | 1             | 0            | 1             | 0:00.55                         |
| 474       | TRUE          | 1             | 0            | 1             | 0:00.54                         |
| 475       | TRUE          | 1             | 0            | 1             | 0:00.54                         |
| 476       | TRUE          | 1             | 0            | 1             | 0:00.53                         |
| 477       | TRUE          | 1             | 0            | 1             | 0:00.53                         |
| 478       | TRUE          | 1             | 0            | 1             | 0:00.54                         |
| 479       | TRUE          | 1             | 0            | 1             | 0:00.54                         |
| 480       | TRUE          | 1             | 0            | 1             | 0:00.54                         |
| 481       | TRUE          | 1             | 0            | 1             | 0:00.55                         |
| 482       | TRUE          | 1             | 0            | 1             | 0:00.53                         |
| 483       | TRUE          | 1             | 0            | 1             | 0:00.53                         |
| 484       | TRUE          | 1             | 0            | 1             | 0:00.54                         |
| 485       | TRUE          | 1             | 0            | 1             | 0:00.54                         |
| 486       | TRUE          | 1             | 0            | 1             | 0:00.54                         |
| 487       | TRUE          | 1             | 0            | 1             | 0:00.53                         |
| 488       | TRUE          | 1             | 0            | 1             | 0:00.54                         |
| 489       | TRUE          | 1             | 0            | 1             | 0:00.53                         |
| 490       | TRUE          | 1             | 0            | 1             | 0:00.53                         |
| 491       | TRUE          | 1             | 0            | 1             | 0:00.54                         |
| 492       | TRUE          | 1             | 0            | 1             | 0:00.52                         |
| 493       | TRUE          | 1             | 0            | 1             | 0:00.54                         |
| 494       | TRUE          | 1             | 0            | 1             | 0:00.54                         |
| 495       | TRUE          | 1             | 0            | 1             | 0:00.55                         |
| 496       | TRUE          | 1             | 0            | 1             | 0:00.53                         |
| 497       | TRUE          | 1             | 0            | 1             | 0:00.54                         |
| 498       | TRUE          | 1             | 0            | 1             | 0:00.53                         |
| 499       | TRUE          | 1             | 0            | 1             | 0:00.54                         |

| <b>Id</b> | <b>Result</b> | <b>#total</b> | <b>#true</b> | <b>#false</b> | <b>Execution time (min:sec)</b> |
|-----------|---------------|---------------|--------------|---------------|---------------------------------|
| 500       | TRUE          | 1             | 0            | 1             | 0:00.54                         |

Table 3: Model checking results corresponding to PBLMSTL statement 6

| <b>Id</b> | <b>Result</b> | <b>#total</b> | <b>#true</b> | <b>#false</b> | <b>Execution time (min:sec)</b> |
|-----------|---------------|---------------|--------------|---------------|---------------------------------|
| 1         | TRUE          | 1             | 1            | 0             | 0:00.54                         |
| 2         | TRUE          | 1             | 1            | 0             | 0:00.55                         |
| 3         | TRUE          | 1             | 1            | 0             | 0:00.55                         |
| 4         | TRUE          | 1             | 1            | 0             | 0:00.55                         |
| 5         | TRUE          | 1             | 1            | 0             | 0:00.54                         |
| 6         | TRUE          | 1             | 1            | 0             | 0:00.55                         |
| 7         | TRUE          | 1             | 1            | 0             | 0:00.55                         |
| 8         | TRUE          | 1             | 1            | 0             | 0:00.55                         |
| 9         | TRUE          | 1             | 1            | 0             | 0:00.55                         |
| 10        | TRUE          | 1             | 1            | 0             | 0:00.55                         |
| 11        | TRUE          | 1             | 1            | 0             | 0:00.55                         |
| 12        | TRUE          | 1             | 1            | 0             | 0:00.54                         |
| 13        | TRUE          | 1             | 1            | 0             | 0:00.54                         |
| 14        | TRUE          | 1             | 1            | 0             | 0:00.55                         |
| 15        | TRUE          | 1             | 1            | 0             | 0:00.55                         |
| 16        | TRUE          | 1             | 1            | 0             | 0:00.55                         |
| 17        | TRUE          | 1             | 1            | 0             | 0:00.55                         |
| 18        | TRUE          | 1             | 1            | 0             | 0:00.55                         |
| 19        | TRUE          | 1             | 1            | 0             | 0:00.54                         |
| 20        | TRUE          | 1             | 1            | 0             | 0:00.55                         |
| 21        | TRUE          | 1             | 1            | 0             | 0:00.54                         |
| 22        | TRUE          | 1             | 1            | 0             | 0:00.55                         |
| 23        | TRUE          | 1             | 1            | 0             | 0:00.55                         |
| 24        | TRUE          | 1             | 1            | 0             | 0:00.54                         |
| 25        | TRUE          | 1             | 1            | 0             | 0:00.55                         |
| 26        | TRUE          | 1             | 1            | 0             | 0:00.54                         |
| 27        | TRUE          | 1             | 1            | 0             | 0:00.55                         |
| 28        | TRUE          | 1             | 1            | 0             | 0:00.55                         |
| 29        | TRUE          | 1             | 1            | 0             | 0:00.55                         |
| 30        | TRUE          | 1             | 1            | 0             | 0:00.55                         |
| 31        | TRUE          | 1             | 1            | 0             | 0:00.55                         |
| 32        | TRUE          | 1             | 1            | 0             | 0:00.54                         |
| 33        | TRUE          | 1             | 1            | 0             | 0:00.55                         |
| 34        | TRUE          | 1             | 1            | 0             | 0:00.55                         |
| 35        | TRUE          | 1             | 1            | 0             | 0:00.54                         |
| 36        | TRUE          | 1             | 1            | 0             | 0:00.55                         |
| 37        | TRUE          | 1             | 1            | 0             | 0:00.55                         |
| 38        | TRUE          | 1             | 1            | 0             | 0:00.55                         |
| 39        | TRUE          | 1             | 1            | 0             | 0:00.55                         |
| 40        | TRUE          | 1             | 1            | 0             | 0:00.55                         |

| <b>Id</b> | <b>Result</b> | <b>#total</b> | <b>#true</b> | <b>#false</b> | <b>Execution time (min:sec)</b> |
|-----------|---------------|---------------|--------------|---------------|---------------------------------|
| 41        | TRUE          | 1             | 1            | 0             | 0:00.55                         |
| 42        | TRUE          | 1             | 1            | 0             | 0:00.55                         |
| 43        | TRUE          | 1             | 1            | 0             | 0:00.55                         |
| 44        | TRUE          | 1             | 1            | 0             | 0:00.55                         |
| 45        | TRUE          | 1             | 1            | 0             | 0:00.55                         |
| 46        | TRUE          | 1             | 1            | 0             | 0:00.55                         |
| 47        | TRUE          | 1             | 1            | 0             | 0:00.53                         |
| 48        | TRUE          | 1             | 1            | 0             | 0:00.55                         |
| 49        | TRUE          | 1             | 1            | 0             | 0:00.54                         |
| 50        | TRUE          | 1             | 1            | 0             | 0:00.55                         |
| 51        | TRUE          | 1             | 1            | 0             | 0:00.54                         |
| 52        | TRUE          | 1             | 1            | 0             | 0:00.55                         |
| 53        | TRUE          | 1             | 1            | 0             | 0:00.54                         |
| 54        | TRUE          | 1             | 1            | 0             | 0:00.55                         |
| 55        | TRUE          | 1             | 1            | 0             | 0:00.55                         |
| 56        | TRUE          | 1             | 1            | 0             | 0:00.55                         |
| 57        | TRUE          | 1             | 1            | 0             | 0:00.54                         |
| 58        | TRUE          | 1             | 1            | 0             | 0:00.54                         |
| 59        | TRUE          | 1             | 1            | 0             | 0:00.55                         |
| 60        | TRUE          | 1             | 1            | 0             | 0:00.55                         |
| 61        | TRUE          | 1             | 1            | 0             | 0:00.55                         |
| 62        | TRUE          | 1             | 1            | 0             | 0:00.55                         |
| 63        | TRUE          | 1             | 1            | 0             | 0:00.56                         |
| 64        | TRUE          | 1             | 1            | 0             | 0:00.55                         |
| 65        | TRUE          | 1             | 1            | 0             | 0:00.54                         |
| 66        | TRUE          | 1             | 1            | 0             | 0:00.56                         |
| 67        | TRUE          | 1             | 1            | 0             | 0:00.54                         |
| 68        | TRUE          | 1             | 1            | 0             | 0:00.55                         |
| 69        | TRUE          | 1             | 1            | 0             | 0:00.55                         |
| 70        | TRUE          | 1             | 1            | 0             | 0:00.53                         |
| 71        | TRUE          | 1             | 1            | 0             | 0:00.55                         |
| 72        | TRUE          | 1             | 1            | 0             | 0:00.54                         |
| 73        | TRUE          | 1             | 1            | 0             | 0:00.55                         |
| 74        | TRUE          | 1             | 1            | 0             | 0:00.54                         |
| 75        | TRUE          | 1             | 1            | 0             | 0:00.56                         |
| 76        | TRUE          | 1             | 1            | 0             | 0:00.54                         |
| 77        | TRUE          | 1             | 1            | 0             | 0:00.55                         |
| 78        | TRUE          | 1             | 1            | 0             | 0:00.56                         |
| 79        | TRUE          | 1             | 1            | 0             | 0:00.55                         |
| 80        | TRUE          | 1             | 1            | 0             | 0:00.55                         |
| 81        | TRUE          | 1             | 1            | 0             | 0:00.55                         |
| 82        | TRUE          | 1             | 1            | 0             | 0:00.55                         |
| 83        | TRUE          | 1             | 1            | 0             | 0:00.54                         |
| 84        | TRUE          | 1             | 1            | 0             | 0:00.55                         |
| 85        | TRUE          | 1             | 1            | 0             | 0:00.55                         |
| 86        | TRUE          | 1             | 1            | 0             | 0:00.55                         |
| 87        | TRUE          | 1             | 1            | 0             | 0:00.55                         |
| 88        | TRUE          | 1             | 1            | 0             | 0:00.54                         |



| <b>Id</b> | <b>Result</b> | <b>#total</b> | <b>#true</b> | <b>#false</b> | <b>Execution time (min:sec)</b> |
|-----------|---------------|---------------|--------------|---------------|---------------------------------|
| 89        | TRUE          | 1             | 1            | 0             | 0:00.55                         |
| 90        | TRUE          | 1             | 1            | 0             | 0:00.55                         |
| 91        | TRUE          | 1             | 1            | 0             | 0:00.55                         |
| 92        | TRUE          | 1             | 1            | 0             | 0:00.55                         |
| 93        | TRUE          | 1             | 1            | 0             | 0:00.54                         |
| 94        | TRUE          | 1             | 1            | 0             | 0:00.55                         |
| 95        | TRUE          | 1             | 1            | 0             | 0:00.53                         |
| 96        | TRUE          | 1             | 1            | 0             | 0:00.54                         |
| 97        | TRUE          | 1             | 1            | 0             | 0:00.54                         |
| 98        | TRUE          | 1             | 1            | 0             | 0:00.55                         |
| 99        | TRUE          | 1             | 1            | 0             | 0:00.55                         |
| 100       | TRUE          | 1             | 1            | 0             | 0:00.54                         |
| 101       | TRUE          | 1             | 1            | 0             | 0:00.54                         |
| 102       | TRUE          | 1             | 1            | 0             | 0:00.55                         |
| 103       | TRUE          | 1             | 1            | 0             | 0:00.55                         |
| 104       | TRUE          | 1             | 1            | 0             | 0:00.55                         |
| 105       | TRUE          | 1             | 1            | 0             | 0:00.55                         |
| 106       | TRUE          | 1             | 1            | 0             | 0:00.54                         |
| 107       | TRUE          | 1             | 1            | 0             | 0:00.55                         |
| 108       | TRUE          | 1             | 1            | 0             | 0:00.54                         |
| 109       | TRUE          | 1             | 1            | 0             | 0:00.55                         |
| 110       | TRUE          | 1             | 1            | 0             | 0:00.54                         |
| 111       | TRUE          | 1             | 1            | 0             | 0:00.55                         |
| 112       | TRUE          | 1             | 1            | 0             | 0:00.55                         |
| 113       | TRUE          | 1             | 1            | 0             | 0:00.55                         |
| 114       | TRUE          | 1             | 1            | 0             | 0:00.55                         |
| 115       | TRUE          | 1             | 1            | 0             | 0:00.54                         |
| 116       | TRUE          | 1             | 1            | 0             | 0:00.55                         |
| 117       | TRUE          | 1             | 1            | 0             | 0:00.55                         |
| 118       | TRUE          | 1             | 1            | 0             | 0:00.55                         |
| 119       | TRUE          | 1             | 1            | 0             | 0:00.55                         |
| 120       | TRUE          | 1             | 1            | 0             | 0:00.55                         |
| 121       | TRUE          | 1             | 1            | 0             | 0:00.55                         |
| 122       | TRUE          | 1             | 1            | 0             | 0:00.55                         |
| 123       | TRUE          | 1             | 1            | 0             | 0:00.55                         |
| 124       | TRUE          | 1             | 1            | 0             | 0:00.55                         |
| 125       | TRUE          | 1             | 1            | 0             | 0:00.55                         |
| 126       | TRUE          | 1             | 1            | 0             | 0:00.54                         |
| 127       | TRUE          | 1             | 1            | 0             | 0:00.55                         |
| 128       | TRUE          | 1             | 1            | 0             | 0:00.55                         |
| 129       | TRUE          | 1             | 1            | 0             | 0:00.55                         |
| 130       | TRUE          | 1             | 1            | 0             | 0:00.55                         |
| 131       | TRUE          | 1             | 1            | 0             | 0:00.54                         |
| 132       | TRUE          | 1             | 1            | 0             | 0:00.56                         |
| 133       | TRUE          | 1             | 1            | 0             | 0:00.55                         |
| 134       | TRUE          | 1             | 1            | 0             | 0:00.55                         |
| 135       | TRUE          | 1             | 1            | 0             | 0:00.55                         |
| 136       | TRUE          | 1             | 1            | 0             | 0:00.55                         |

| Id  | Result | #total | #true | #false | Execution time (min:sec) |
|-----|--------|--------|-------|--------|--------------------------|
| 137 | TRUE   | 1      | 1     | 0      | 0:00.56                  |
| 138 | TRUE   | 1      | 1     | 0      | 0:00.54                  |
| 139 | TRUE   | 1      | 1     | 0      | 0:00.55                  |
| 140 | TRUE   | 1      | 1     | 0      | 0:00.55                  |
| 141 | TRUE   | 1      | 1     | 0      | 0:00.55                  |
| 142 | TRUE   | 1      | 1     | 0      | 0:00.55                  |
| 143 | TRUE   | 1      | 1     | 0      | 0:00.55                  |
| 144 | TRUE   | 1      | 1     | 0      | 0:00.56                  |
| 145 | TRUE   | 1      | 1     | 0      | 0:00.55                  |
| 146 | TRUE   | 1      | 1     | 0      | 0:00.55                  |
| 147 | TRUE   | 1      | 1     | 0      | 0:00.54                  |
| 148 | TRUE   | 1      | 1     | 0      | 0:00.55                  |
| 149 | TRUE   | 1      | 1     | 0      | 0:00.56                  |
| 150 | TRUE   | 1      | 1     | 0      | 0:00.55                  |
| 151 | TRUE   | 1      | 1     | 0      | 0:00.55                  |
| 152 | TRUE   | 1      | 1     | 0      | 0:00.55                  |
| 153 | TRUE   | 1      | 1     | 0      | 0:00.55                  |
| 154 | TRUE   | 1      | 1     | 0      | 0:00.55                  |
| 155 | TRUE   | 1      | 1     | 0      | 0:00.55                  |
| 156 | TRUE   | 1      | 1     | 0      | 0:00.55                  |
| 157 | TRUE   | 1      | 1     | 0      | 0:00.54                  |
| 158 | TRUE   | 1      | 1     | 0      | 0:00.55                  |
| 159 | TRUE   | 1      | 1     | 0      | 0:00.54                  |
| 160 | TRUE   | 1      | 1     | 0      | 0:00.55                  |
| 161 | TRUE   | 1      | 1     | 0      | 0:00.55                  |
| 162 | TRUE   | 1      | 1     | 0      | 0:00.56                  |
| 163 | TRUE   | 1      | 1     | 0      | 0:00.54                  |
| 164 | TRUE   | 1      | 1     | 0      | 0:00.54                  |
| 165 | TRUE   | 1      | 1     | 0      | 0:00.55                  |
| 166 | TRUE   | 1      | 1     | 0      | 0:00.55                  |
| 167 | TRUE   | 1      | 1     | 0      | 0:00.55                  |
| 168 | TRUE   | 1      | 1     | 0      | 0:00.56                  |
| 169 | TRUE   | 1      | 1     | 0      | 0:00.55                  |
| 170 | TRUE   | 1      | 1     | 0      | 0:00.55                  |
| 171 | TRUE   | 1      | 1     | 0      | 0:00.54                  |
| 172 | TRUE   | 1      | 1     | 0      | 0:00.54                  |
| 173 | TRUE   | 1      | 1     | 0      | 0:00.56                  |
| 174 | TRUE   | 1      | 1     | 0      | 0:00.55                  |
| 175 | TRUE   | 1      | 1     | 0      | 0:00.55                  |
| 176 | TRUE   | 1      | 1     | 0      | 0:00.54                  |
| 177 | TRUE   | 1      | 1     | 0      | 0:00.55                  |
| 178 | TRUE   | 1      | 1     | 0      | 0:00.56                  |
| 179 | TRUE   | 1      | 1     | 0      | 0:00.55                  |
| 180 | TRUE   | 1      | 1     | 0      | 0:00.55                  |
| 181 | TRUE   | 1      | 1     | 0      | 0:00.55                  |
| 182 | TRUE   | 1      | 1     | 0      | 0:00.55                  |
| 183 | TRUE   | 1      | 1     | 0      | 0:00.54                  |
| 184 | TRUE   | 1      | 1     | 0      | 0:00.54                  |

| <b>Id</b> | <b>Result</b> | <b>#total</b> | <b>#true</b> | <b>#false</b> | <b>Execution time (min:sec)</b> |
|-----------|---------------|---------------|--------------|---------------|---------------------------------|
| 185       | TRUE          | 1             | 1            | 0             | 0:00.55                         |
| 186       | TRUE          | 1             | 1            | 0             | 0:00.55                         |
| 187       | TRUE          | 1             | 1            | 0             | 0:00.55                         |
| 188       | TRUE          | 1             | 1            | 0             | 0:00.55                         |
| 189       | TRUE          | 1             | 1            | 0             | 0:00.55                         |
| 190       | TRUE          | 1             | 1            | 0             | 0:00.54                         |
| 191       | TRUE          | 1             | 1            | 0             | 0:00.55                         |
| 192       | TRUE          | 1             | 1            | 0             | 0:00.54                         |
| 193       | TRUE          | 1             | 1            | 0             | 0:00.55                         |
| 194       | TRUE          | 1             | 1            | 0             | 0:00.53                         |
| 195       | TRUE          | 1             | 1            | 0             | 0:00.55                         |
| 196       | TRUE          | 1             | 1            | 0             | 0:00.54                         |
| 197       | TRUE          | 1             | 1            | 0             | 0:00.55                         |
| 198       | TRUE          | 1             | 1            | 0             | 0:00.54                         |
| 199       | TRUE          | 1             | 1            | 0             | 0:00.55                         |
| 200       | TRUE          | 1             | 1            | 0             | 0:00.55                         |
| 201       | TRUE          | 1             | 1            | 0             | 0:00.55                         |
| 202       | TRUE          | 1             | 1            | 0             | 0:00.54                         |
| 203       | TRUE          | 1             | 1            | 0             | 0:00.54                         |
| 204       | TRUE          | 1             | 1            | 0             | 0:00.55                         |
| 205       | TRUE          | 1             | 1            | 0             | 0:00.55                         |
| 206       | TRUE          | 1             | 1            | 0             | 0:00.55                         |
| 207       | TRUE          | 1             | 1            | 0             | 0:00.56                         |
| 208       | TRUE          | 1             | 1            | 0             | 0:00.55                         |
| 209       | TRUE          | 1             | 1            | 0             | 0:00.55                         |
| 210       | TRUE          | 1             | 1            | 0             | 0:00.55                         |
| 211       | TRUE          | 1             | 1            | 0             | 0:00.55                         |
| 212       | TRUE          | 1             | 1            | 0             | 0:00.54                         |
| 213       | TRUE          | 1             | 1            | 0             | 0:00.55                         |
| 214       | TRUE          | 1             | 1            | 0             | 0:00.54                         |
| 215       | TRUE          | 1             | 1            | 0             | 0:00.54                         |
| 216       | TRUE          | 1             | 1            | 0             | 0:00.54                         |
| 217       | TRUE          | 1             | 1            | 0             | 0:00.55                         |
| 218       | TRUE          | 1             | 1            | 0             | 0:00.55                         |
| 219       | TRUE          | 1             | 1            | 0             | 0:00.55                         |
| 220       | TRUE          | 1             | 1            | 0             | 0:00.56                         |
| 221       | TRUE          | 1             | 1            | 0             | 0:00.55                         |
| 222       | TRUE          | 1             | 1            | 0             | 0:00.54                         |
| 223       | TRUE          | 1             | 1            | 0             | 0:00.55                         |
| 224       | TRUE          | 1             | 1            | 0             | 0:00.56                         |
| 225       | TRUE          | 1             | 1            | 0             | 0:00.57                         |
| 226       | TRUE          | 1             | 1            | 0             | 0:00.55                         |
| 227       | TRUE          | 1             | 1            | 0             | 0:00.55                         |
| 228       | TRUE          | 1             | 1            | 0             | 0:00.55                         |
| 229       | TRUE          | 1             | 1            | 0             | 0:00.55                         |
| 230       | TRUE          | 1             | 1            | 0             | 0:00.55                         |
| 231       | TRUE          | 1             | 1            | 0             | 0:00.55                         |
| 232       | TRUE          | 1             | 1            | 0             | 0:00.55                         |

| <b>Id</b> | <b>Result</b> | <b>#total</b> | <b>#true</b> | <b>#false</b> | <b>Execution time (min:sec)</b> |
|-----------|---------------|---------------|--------------|---------------|---------------------------------|
| 233       | TRUE          | 1             | 1            | 0             | 0:00.55                         |
| 234       | TRUE          | 1             | 1            | 0             | 0:00.56                         |
| 235       | TRUE          | 1             | 1            | 0             | 0:00.55                         |
| 236       | TRUE          | 1             | 1            | 0             | 0:00.55                         |
| 237       | TRUE          | 1             | 1            | 0             | 0:00.55                         |
| 238       | TRUE          | 1             | 1            | 0             | 0:00.54                         |
| 239       | TRUE          | 1             | 1            | 0             | 0:00.55                         |
| 240       | TRUE          | 1             | 1            | 0             | 0:00.54                         |
| 241       | TRUE          | 1             | 1            | 0             | 0:00.56                         |
| 242       | TRUE          | 1             | 1            | 0             | 0:00.55                         |
| 243       | TRUE          | 1             | 1            | 0             | 0:00.54                         |
| 244       | TRUE          | 1             | 1            | 0             | 0:00.55                         |
| 245       | TRUE          | 1             | 1            | 0             | 0:00.54                         |
| 246       | TRUE          | 1             | 1            | 0             | 0:00.55                         |
| 247       | TRUE          | 1             | 1            | 0             | 0:00.55                         |
| 248       | TRUE          | 1             | 1            | 0             | 0:00.55                         |
| 249       | TRUE          | 1             | 1            | 0             | 0:00.55                         |
| 250       | TRUE          | 1             | 1            | 0             | 0:00.55                         |
| 251       | TRUE          | 1             | 1            | 0             | 0:00.54                         |
| 252       | TRUE          | 1             | 1            | 0             | 0:00.56                         |
| 253       | TRUE          | 1             | 1            | 0             | 0:00.54                         |
| 254       | TRUE          | 1             | 1            | 0             | 0:00.55                         |
| 255       | TRUE          | 1             | 1            | 0             | 0:00.53                         |
| 256       | TRUE          | 1             | 1            | 0             | 0:00.55                         |
| 257       | TRUE          | 1             | 1            | 0             | 0:00.55                         |
| 258       | TRUE          | 1             | 1            | 0             | 0:00.54                         |
| 259       | TRUE          | 1             | 1            | 0             | 0:00.54                         |
| 260       | TRUE          | 1             | 1            | 0             | 0:00.54                         |
| 261       | TRUE          | 1             | 1            | 0             | 0:00.55                         |
| 262       | TRUE          | 1             | 1            | 0             | 0:00.54                         |
| 263       | TRUE          | 1             | 1            | 0             | 0:00.54                         |
| 264       | TRUE          | 1             | 1            | 0             | 0:00.54                         |
| 265       | TRUE          | 1             | 1            | 0             | 0:00.55                         |
| 266       | TRUE          | 1             | 1            | 0             | 0:00.56                         |
| 267       | TRUE          | 1             | 1            | 0             | 0:00.56                         |
| 268       | TRUE          | 1             | 1            | 0             | 0:00.55                         |
| 269       | TRUE          | 1             | 1            | 0             | 0:00.54                         |
| 270       | TRUE          | 1             | 1            | 0             | 0:00.55                         |
| 271       | TRUE          | 1             | 1            | 0             | 0:00.55                         |
| 272       | TRUE          | 1             | 1            | 0             | 0:00.55                         |
| 273       | TRUE          | 1             | 1            | 0             | 0:00.56                         |
| 274       | TRUE          | 1             | 1            | 0             | 0:00.55                         |
| 275       | TRUE          | 1             | 1            | 0             | 0:00.55                         |
| 276       | TRUE          | 1             | 1            | 0             | 0:00.55                         |
| 277       | TRUE          | 1             | 1            | 0             | 0:00.55                         |
| 278       | TRUE          | 1             | 1            | 0             | 0:00.55                         |
| 279       | TRUE          | 1             | 1            | 0             | 0:00.56                         |
| 280       | TRUE          | 1             | 1            | 0             | 0:00.55                         |

| <b>Id</b> | <b>Result</b> | <b>#total</b> | <b>#true</b> | <b>#false</b> | <b>Execution time (min:sec)</b> |
|-----------|---------------|---------------|--------------|---------------|---------------------------------|
| 281       | TRUE          | 1             | 1            | 0             | 0:00.55                         |
| 282       | TRUE          | 1             | 1            | 0             | 0:00.55                         |
| 283       | TRUE          | 1             | 1            | 0             | 0:00.55                         |
| 284       | TRUE          | 1             | 1            | 0             | 0:00.55                         |
| 285       | TRUE          | 1             | 1            | 0             | 0:00.55                         |
| 286       | TRUE          | 1             | 1            | 0             | 0:00.54                         |
| 287       | TRUE          | 1             | 1            | 0             | 0:00.55                         |
| 288       | TRUE          | 1             | 1            | 0             | 0:00.55                         |
| 289       | TRUE          | 1             | 1            | 0             | 0:00.55                         |
| 290       | TRUE          | 1             | 1            | 0             | 0:00.55                         |
| 291       | TRUE          | 1             | 1            | 0             | 0:00.56                         |
| 292       | TRUE          | 1             | 1            | 0             | 0:00.55                         |
| 293       | TRUE          | 1             | 1            | 0             | 0:00.54                         |
| 294       | TRUE          | 1             | 1            | 0             | 0:00.55                         |
| 295       | TRUE          | 1             | 1            | 0             | 0:00.55                         |
| 296       | TRUE          | 1             | 1            | 0             | 0:00.55                         |
| 297       | TRUE          | 1             | 1            | 0             | 0:00.55                         |
| 298       | TRUE          | 1             | 1            | 0             | 0:00.55                         |
| 299       | TRUE          | 1             | 1            | 0             | 0:00.54                         |
| 300       | TRUE          | 1             | 1            | 0             | 0:00.54                         |
| 301       | TRUE          | 1             | 1            | 0             | 0:00.55                         |
| 302       | TRUE          | 1             | 1            | 0             | 0:00.54                         |
| 303       | TRUE          | 1             | 1            | 0             | 0:00.55                         |
| 304       | TRUE          | 1             | 1            | 0             | 0:00.55                         |
| 305       | TRUE          | 1             | 1            | 0             | 0:00.53                         |
| 306       | TRUE          | 1             | 1            | 0             | 0:00.55                         |
| 307       | TRUE          | 1             | 1            | 0             | 0:00.55                         |
| 308       | TRUE          | 1             | 1            | 0             | 0:00.55                         |
| 309       | TRUE          | 1             | 1            | 0             | 0:00.55                         |
| 310       | TRUE          | 1             | 1            | 0             | 0:00.54                         |
| 311       | TRUE          | 1             | 1            | 0             | 0:00.55                         |
| 312       | TRUE          | 1             | 1            | 0             | 0:00.54                         |
| 313       | TRUE          | 1             | 1            | 0             | 0:00.55                         |
| 314       | TRUE          | 1             | 1            | 0             | 0:00.54                         |
| 315       | TRUE          | 1             | 1            | 0             | 0:00.56                         |
| 316       | TRUE          | 1             | 1            | 0             | 0:00.55                         |
| 317       | TRUE          | 1             | 1            | 0             | 0:00.54                         |
| 318       | TRUE          | 1             | 1            | 0             | 0:00.54                         |
| 319       | TRUE          | 1             | 1            | 0             | 0:00.55                         |
| 320       | TRUE          | 1             | 1            | 0             | 0:00.55                         |
| 321       | TRUE          | 1             | 1            | 0             | 0:00.55                         |
| 322       | TRUE          | 1             | 1            | 0             | 0:00.55                         |
| 323       | TRUE          | 1             | 1            | 0             | 0:00.56                         |
| 324       | TRUE          | 1             | 1            | 0             | 0:00.55                         |
| 325       | TRUE          | 1             | 1            | 0             | 0:00.55                         |
| 326       | TRUE          | 1             | 1            | 0             | 0:00.55                         |
| 327       | TRUE          | 1             | 1            | 0             | 0:00.55                         |
| 328       | TRUE          | 1             | 1            | 0             | 0:00.54                         |

| <b>Id</b> | <b>Result</b> | <b>#total</b> | <b>#true</b> | <b>#false</b> | <b>Execution time (min:sec)</b> |
|-----------|---------------|---------------|--------------|---------------|---------------------------------|
| 329       | TRUE          | 1             | 1            | 0             | 0:00.54                         |
| 330       | TRUE          | 1             | 1            | 0             | 0:00.54                         |
| 331       | TRUE          | 1             | 1            | 0             | 0:00.55                         |
| 332       | TRUE          | 1             | 1            | 0             | 0:00.54                         |
| 333       | TRUE          | 1             | 1            | 0             | 0:00.55                         |
| 334       | TRUE          | 1             | 1            | 0             | 0:00.55                         |
| 335       | TRUE          | 1             | 1            | 0             | 0:00.54                         |
| 336       | TRUE          | 1             | 1            | 0             | 0:00.55                         |
| 337       | TRUE          | 1             | 1            | 0             | 0:00.54                         |
| 338       | TRUE          | 1             | 1            | 0             | 0:00.55                         |
| 339       | TRUE          | 1             | 1            | 0             | 0:00.54                         |
| 340       | TRUE          | 1             | 1            | 0             | 0:00.55                         |
| 341       | TRUE          | 1             | 1            | 0             | 0:00.55                         |
| 342       | TRUE          | 1             | 1            | 0             | 0:00.54                         |
| 343       | TRUE          | 1             | 1            | 0             | 0:00.54                         |
| 344       | TRUE          | 1             | 1            | 0             | 0:00.53                         |
| 345       | TRUE          | 1             | 1            | 0             | 0:00.56                         |
| 346       | TRUE          | 1             | 1            | 0             | 0:00.55                         |
| 347       | TRUE          | 1             | 1            | 0             | 0:00.55                         |
| 348       | TRUE          | 1             | 1            | 0             | 0:00.54                         |
| 349       | TRUE          | 1             | 1            | 0             | 0:00.55                         |
| 350       | TRUE          | 1             | 1            | 0             | 0:00.54                         |
| 351       | TRUE          | 1             | 1            | 0             | 0:00.55                         |
| 352       | TRUE          | 1             | 1            | 0             | 0:00.55                         |
| 353       | TRUE          | 1             | 1            | 0             | 0:00.55                         |
| 354       | TRUE          | 1             | 1            | 0             | 0:00.55                         |
| 355       | TRUE          | 1             | 1            | 0             | 0:00.55                         |
| 356       | TRUE          | 1             | 1            | 0             | 0:00.55                         |
| 357       | TRUE          | 1             | 1            | 0             | 0:00.55                         |
| 358       | TRUE          | 1             | 1            | 0             | 0:00.54                         |
| 359       | TRUE          | 1             | 1            | 0             | 0:00.55                         |
| 360       | TRUE          | 1             | 1            | 0             | 0:00.56                         |
| 361       | TRUE          | 1             | 1            | 0             | 0:00.55                         |
| 362       | TRUE          | 1             | 1            | 0             | 0:00.55                         |
| 363       | TRUE          | 1             | 1            | 0             | 0:00.55                         |
| 364       | TRUE          | 1             | 1            | 0             | 0:00.56                         |
| 365       | TRUE          | 1             | 1            | 0             | 0:00.56                         |
| 366       | TRUE          | 1             | 1            | 0             | 0:00.56                         |
| 367       | TRUE          | 1             | 1            | 0             | 0:00.55                         |
| 368       | TRUE          | 1             | 1            | 0             | 0:00.55                         |
| 369       | TRUE          | 1             | 1            | 0             | 0:00.55                         |
| 370       | TRUE          | 1             | 1            | 0             | 0:00.55                         |
| 371       | TRUE          | 1             | 1            | 0             | 0:00.55                         |
| 372       | TRUE          | 1             | 1            | 0             | 0:00.54                         |
| 373       | TRUE          | 1             | 1            | 0             | 0:00.55                         |
| 374       | TRUE          | 1             | 1            | 0             | 0:00.54                         |
| 375       | TRUE          | 1             | 1            | 0             | 0:00.55                         |
| 376       | TRUE          | 1             | 1            | 0             | 0:00.55                         |

| <b>Id</b> | <b>Result</b> | <b>#total</b> | <b>#true</b> | <b>#false</b> | <b>Execution time (min:sec)</b> |
|-----------|---------------|---------------|--------------|---------------|---------------------------------|
| 377       | TRUE          | 1             | 1            | 0             | 0:00.55                         |
| 378       | TRUE          | 1             | 1            | 0             | 0:00.55                         |
| 379       | TRUE          | 1             | 1            | 0             | 0:00.55                         |
| 380       | TRUE          | 1             | 1            | 0             | 0:00.54                         |
| 381       | TRUE          | 1             | 1            | 0             | 0:00.55                         |
| 382       | TRUE          | 1             | 1            | 0             | 0:00.55                         |
| 383       | TRUE          | 1             | 1            | 0             | 0:00.55                         |
| 384       | TRUE          | 1             | 1            | 0             | 0:00.55                         |
| 385       | TRUE          | 1             | 1            | 0             | 0:00.54                         |
| 386       | TRUE          | 1             | 1            | 0             | 0:00.55                         |
| 387       | TRUE          | 1             | 1            | 0             | 0:00.54                         |
| 388       | TRUE          | 1             | 1            | 0             | 0:00.54                         |
| 389       | TRUE          | 1             | 1            | 0             | 0:00.55                         |
| 390       | TRUE          | 1             | 1            | 0             | 0:00.54                         |
| 391       | TRUE          | 1             | 1            | 0             | 0:00.55                         |
| 392       | TRUE          | 1             | 1            | 0             | 0:00.53                         |
| 393       | TRUE          | 1             | 1            | 0             | 0:00.55                         |
| 394       | TRUE          | 1             | 1            | 0             | 0:00.55                         |
| 395       | TRUE          | 1             | 1            | 0             | 0:00.55                         |
| 396       | TRUE          | 1             | 1            | 0             | 0:00.53                         |
| 397       | TRUE          | 1             | 1            | 0             | 0:00.55                         |
| 398       | TRUE          | 1             | 1            | 0             | 0:00.54                         |
| 399       | TRUE          | 1             | 1            | 0             | 0:00.55                         |
| 400       | TRUE          | 1             | 1            | 0             | 0:00.55                         |
| 401       | TRUE          | 1             | 1            | 0             | 0:00.55                         |
| 402       | TRUE          | 1             | 1            | 0             | 0:00.55                         |
| 403       | TRUE          | 1             | 1            | 0             | 0:00.55                         |
| 404       | TRUE          | 1             | 1            | 0             | 0:00.53                         |
| 405       | TRUE          | 1             | 1            | 0             | 0:00.55                         |
| 406       | TRUE          | 1             | 1            | 0             | 0:00.55                         |
| 407       | TRUE          | 1             | 1            | 0             | 0:00.57                         |
| 408       | TRUE          | 1             | 1            | 0             | 0:00.55                         |
| 409       | TRUE          | 1             | 1            | 0             | 0:00.56                         |
| 410       | TRUE          | 1             | 1            | 0             | 0:00.55                         |
| 411       | TRUE          | 1             | 1            | 0             | 0:00.54                         |
| 412       | TRUE          | 1             | 1            | 0             | 0:00.55                         |
| 413       | TRUE          | 1             | 1            | 0             | 0:00.55                         |
| 414       | TRUE          | 1             | 1            | 0             | 0:00.56                         |
| 415       | TRUE          | 1             | 1            | 0             | 0:00.55                         |
| 416       | TRUE          | 1             | 1            | 0             | 0:00.55                         |
| 417       | TRUE          | 1             | 1            | 0             | 0:00.54                         |
| 418       | TRUE          | 1             | 1            | 0             | 0:00.54                         |
| 419       | TRUE          | 1             | 1            | 0             | 0:00.54                         |
| 420       | TRUE          | 1             | 1            | 0             | 0:00.55                         |
| 421       | TRUE          | 1             | 1            | 0             | 0:00.55                         |
| 422       | TRUE          | 1             | 1            | 0             | 0:00.55                         |
| 423       | TRUE          | 1             | 1            | 0             | 0:00.55                         |
| 424       | TRUE          | 1             | 1            | 0             | 0:00.55                         |

| <b>Id</b> | <b>Result</b> | <b>#total</b> | <b>#true</b> | <b>#false</b> | <b>Execution time (min:sec)</b> |
|-----------|---------------|---------------|--------------|---------------|---------------------------------|
| 425       | TRUE          | 1             | 1            | 0             | 0:00.55                         |
| 426       | TRUE          | 1             | 1            | 0             | 0:00.55                         |
| 427       | TRUE          | 1             | 1            | 0             | 0:00.54                         |
| 428       | TRUE          | 1             | 1            | 0             | 0:00.54                         |
| 429       | TRUE          | 1             | 1            | 0             | 0:00.54                         |
| 430       | TRUE          | 1             | 1            | 0             | 0:00.55                         |
| 431       | TRUE          | 1             | 1            | 0             | 0:00.55                         |
| 432       | TRUE          | 1             | 1            | 0             | 0:00.56                         |
| 433       | TRUE          | 1             | 1            | 0             | 0:00.55                         |
| 434       | TRUE          | 1             | 1            | 0             | 0:00.55                         |
| 435       | TRUE          | 1             | 1            | 0             | 0:00.55                         |
| 436       | TRUE          | 1             | 1            | 0             | 0:00.55                         |
| 437       | TRUE          | 1             | 1            | 0             | 0:00.55                         |
| 438       | TRUE          | 1             | 1            | 0             | 0:00.55                         |
| 439       | TRUE          | 1             | 1            | 0             | 0:00.54                         |
| 440       | TRUE          | 1             | 1            | 0             | 0:00.55                         |
| 441       | TRUE          | 1             | 1            | 0             | 0:00.55                         |
| 442       | TRUE          | 1             | 1            | 0             | 0:00.54                         |
| 443       | TRUE          | 1             | 1            | 0             | 0:00.56                         |
| 444       | TRUE          | 1             | 1            | 0             | 0:00.55                         |
| 445       | TRUE          | 1             | 1            | 0             | 0:00.55                         |
| 446       | TRUE          | 1             | 1            | 0             | 0:00.55                         |
| 447       | TRUE          | 1             | 1            | 0             | 0:00.54                         |
| 448       | TRUE          | 1             | 1            | 0             | 0:00.56                         |
| 449       | TRUE          | 1             | 1            | 0             | 0:00.53                         |
| 450       | TRUE          | 1             | 1            | 0             | 0:00.53                         |
| 451       | TRUE          | 1             | 1            | 0             | 0:00.56                         |
| 452       | TRUE          | 1             | 1            | 0             | 0:00.54                         |
| 453       | TRUE          | 1             | 1            | 0             | 0:00.55                         |
| 454       | TRUE          | 1             | 1            | 0             | 0:00.54                         |
| 455       | TRUE          | 1             | 1            | 0             | 0:00.55                         |
| 456       | TRUE          | 1             | 1            | 0             | 0:00.55                         |
| 457       | TRUE          | 1             | 1            | 0             | 0:00.55                         |
| 458       | TRUE          | 1             | 1            | 0             | 0:00.55                         |
| 459       | TRUE          | 1             | 1            | 0             | 0:00.56                         |
| 460       | TRUE          | 1             | 1            | 0             | 0:00.56                         |
| 461       | TRUE          | 1             | 1            | 0             | 0:00.56                         |
| 462       | TRUE          | 1             | 1            | 0             | 0:00.55                         |
| 463       | TRUE          | 1             | 1            | 0             | 0:00.55                         |
| 464       | TRUE          | 1             | 1            | 0             | 0:00.55                         |
| 465       | TRUE          | 1             | 1            | 0             | 0:00.54                         |
| 466       | TRUE          | 1             | 1            | 0             | 0:00.54                         |
| 467       | TRUE          | 1             | 1            | 0             | 0:00.55                         |
| 468       | TRUE          | 1             | 1            | 0             | 0:00.54                         |
| 469       | TRUE          | 1             | 1            | 0             | 0:00.55                         |
| 470       | TRUE          | 1             | 1            | 0             | 0:00.55                         |
| 471       | TRUE          | 1             | 1            | 0             | 0:00.55                         |
| 472       | TRUE          | 1             | 1            | 0             | 0:00.55                         |



| Id  | Result | #total | #true | #false | Execution time (min:sec) |
|-----|--------|--------|-------|--------|--------------------------|
| 473 | TRUE   | 1      | 1     | 0      | 0:00.55                  |
| 474 | TRUE   | 1      | 1     | 0      | 0:00.55                  |
| 475 | TRUE   | 1      | 1     | 0      | 0:00.55                  |
| 476 | TRUE   | 1      | 1     | 0      | 0:00.56                  |
| 477 | TRUE   | 1      | 1     | 0      | 0:00.55                  |
| 478 | TRUE   | 1      | 1     | 0      | 0:00.56                  |
| 479 | TRUE   | 1      | 1     | 0      | 0:00.54                  |
| 480 | TRUE   | 1      | 1     | 0      | 0:00.54                  |
| 481 | TRUE   | 1      | 1     | 0      | 0:00.56                  |
| 482 | TRUE   | 1      | 1     | 0      | 0:00.55                  |
| 483 | TRUE   | 1      | 1     | 0      | 0:00.56                  |
| 484 | TRUE   | 1      | 1     | 0      | 0:00.55                  |
| 485 | TRUE   | 1      | 1     | 0      | 0:00.55                  |
| 486 | TRUE   | 1      | 1     | 0      | 0:00.55                  |
| 487 | TRUE   | 1      | 1     | 0      | 0:00.55                  |
| 488 | TRUE   | 1      | 1     | 0      | 0:00.53                  |
| 489 | TRUE   | 1      | 1     | 0      | 0:00.55                  |
| 490 | TRUE   | 1      | 1     | 0      | 0:00.55                  |
| 491 | TRUE   | 1      | 1     | 0      | 0:00.54                  |
| 492 | TRUE   | 1      | 1     | 0      | 0:00.55                  |
| 493 | TRUE   | 1      | 1     | 0      | 0:00.55                  |
| 494 | TRUE   | 1      | 1     | 0      | 0:00.55                  |
| 495 | TRUE   | 1      | 1     | 0      | 0:00.55                  |
| 496 | TRUE   | 1      | 1     | 0      | 0:00.55                  |
| 497 | TRUE   | 1      | 1     | 0      | 0:00.55                  |
| 498 | TRUE   | 1      | 1     | 0      | 0:00.56                  |
| 499 | TRUE   | 1      | 1     | 0      | 0:00.55                  |
| 500 | TRUE   | 1      | 1     | 0      | 0:00.54                  |
