# Supplementary material for: A Novel Method to Verify Multilevel Computational Models of Biological Systems Using Multiscale Spatio-Temporal Meta Model Checking
Source: PubMed Central journal article supplement (PMC4871515; doi:10.1371/journal.pone.0154847), 2016-05-17
Supplement: pone.0154847.s008.pdf [file pone.0154847.s008.pdf]

## Model checking results for the *Xenopus laevis* cell cycle case study

For the convenience of the reader the set of PBLMSTL statements considered for the *Xenopus laevis* cell cycle case study will be restated below:

$$\begin{aligned}
 & P > 0.9 [G [0, 100] (((count(density(filter(regions, \\
 & \quad scaleAndSubsystem = Intracellular.CDK1 \wedge \\
 & \quad density < 0.96))) = count(density(filter(regions, \\
 & \quad scaleAndSubsystem = Intracellular.CDK1)))) \wedge \\
 & \quad (X (count(density(filter(regions, \\
 & \quad \quad scaleAndSubsystem = Intracellular.CDK1 \wedge \\
 & \quad \quad density > 0.96))) = count(density(filter(regions, \\
 & \quad \quad scaleAndSubsystem = Intracellular.CDK1)))))) \\
 & \quad \Rightarrow (d(sum(multiply(area(filter(regions, \\
 & \quad \quad scaleAndSubsystem = Cellular.Embryo)), \\
 & \quad \quad density(filter(regions, scaleAndSubsystem = \\
 & \quad \quad Cellular.Embryo)))))) > 0))] \tag{7}
 \end{aligned}$$

$$\begin{aligned}
 & P > 0.9 [G [0, 100] (((d(avg(density(filter(regions, \\
 & \quad scaleAndSubsystem = Intracellular.APC \\
 & \quad ))) > 0) \wedge (X (d(avg(density(filter(regions, \\
 & \quad scaleAndSubsystem = Intracellular.APC \\
 & \quad ))) < 0))) \Rightarrow (X (d(sum(multiply( \\
 & \quad \quad area(filter(regions, scaleAndSubsystem = \\
 & \quad \quad Cellular.Embryo)), density(filter(regions, \\
 & \quad \quad scaleAndSubsystem = Cellular.Embryo)) \\
 & \quad \quad ))) = 0)))] \tag{8}
 \end{aligned}$$



```

(F [0, 100] ((d(avg(density
(filter(regions, scaleAndSubsystem =
Intracellular.Plk1)))) < 0)
))))))))) ^
(F [0, 100] ((d(avg(density(filter(regions,
scaleAndSubsystem = Intracellular.APC
)))) > 0) ^ (F [0, 100] ((d(avg(density
(filter(regions, scaleAndSubsystem =
Intracellular.APC)))) < 0) ^
(F [0, 100] ((d(avg(density(filter(regions,
scaleAndSubsystem = Intracellular.APC
)))) > 0) ^ (F [0, 100] ((d(avg(density
(filter(regions, scaleAndSubsystem =
Intracellular.APC)))) < 0) ^
(F [0, 100] ((d(avg(density(filter(regions,
scaleAndSubsystem = Intracellular.APC
)))) > 0) ^ (F [0, 100] ((d(avg(density
(filter(regions, scaleAndSubsystem =
Intracellular.APC)))) < 0)
)))))))))])

```

Each table describes the results corresponding to one of the PBLMSTL statements. The first column of each row represents the identifier of the model checking execution. The second column represents the evaluation result (T = true, F = false) of the PBLMSTL statement for that particular model checker execution. The number of MSTML files against which the PBLMSTL statement was executed, respectively how many of them evaluated true and how many evaluated false is provided in columns three, four and five. Finally column six presents the execution time (minutes:seconds format) corresponding to each model checker run. All executions of the model checker employed the frequentist statistical model checking approach with probability of both type I and type II errors equal to 5%.

Table 1: Model checking results corresponding to PBLMSTL statement 7

| <b>Id</b> | <b>Result</b> | <b>#total</b> | <b>#true</b> | <b>#false</b> | <b>Execution time (min:sec)</b> |
|-----------|---------------|---------------|--------------|---------------|---------------------------------|
| 1         | TRUE          | 28            | 28           | 0             | 0:35.35                         |
| 2         | TRUE          | 32            | 31           | 1             | 0:39.45                         |
| 3         | TRUE          | 28            | 28           | 0             | 0:34.74                         |
| 4         | TRUE          | 28            | 28           | 0             | 0:35.05                         |
| 5         | TRUE          | 28            | 28           | 0             | 0:34.54                         |
| 6         | TRUE          | 28            | 28           | 0             | 0:34.65                         |
| 7         | TRUE          | 28            | 28           | 0             | 0:34.71                         |

| Id | Result | #total | #true | #false | Execution time (min:sec) |
|----|--------|--------|-------|--------|--------------------------|
| 8  | TRUE   | 28     | 28    | 0      | 0:34.78                  |
| 9  | TRUE   | 28     | 28    | 0      | 0:34.79                  |
| 10 | TRUE   | 28     | 28    | 0      | 0:34.81                  |
| 11 | TRUE   | 28     | 28    | 0      | 0:34.54                  |
| 12 | TRUE   | 28     | 28    | 0      | 0:34.46                  |
| 13 | TRUE   | 32     | 31    | 1      | 0:40.12                  |
| 14 | TRUE   | 28     | 28    | 0      | 0:35.99                  |
| 15 | TRUE   | 28     | 28    | 0      | 0:35.82                  |
| 16 | TRUE   | 28     | 28    | 0      | 0:35.62                  |
| 17 | TRUE   | 28     | 28    | 0      | 0:34.66                  |
| 18 | TRUE   | 32     | 31    | 1      | 0:39.36                  |
| 19 | TRUE   | 32     | 31    | 1      | 0:39.49                  |
| 20 | TRUE   | 28     | 28    | 0      | 0:34.66                  |
| 21 | TRUE   | 28     | 28    | 0      | 0:34.77                  |
| 22 | TRUE   | 28     | 28    | 0      | 0:34.74                  |
| 23 | TRUE   | 28     | 28    | 0      | 0:34.67                  |
| 24 | TRUE   | 28     | 28    | 0      | 0:34.55                  |
| 25 | TRUE   | 28     | 28    | 0      | 0:34.59                  |
| 26 | TRUE   | 28     | 28    | 0      | 0:34.55                  |
| 27 | TRUE   | 28     | 28    | 0      | 0:34.44                  |
| 28 | TRUE   | 28     | 28    | 0      | 0:34.51                  |
| 29 | TRUE   | 39     | 37    | 2      | 0:47.65                  |
| 30 | TRUE   | 28     | 28    | 0      | 0:34.40                  |
| 31 | TRUE   | 28     | 28    | 0      | 0:34.56                  |
| 32 | TRUE   | 28     | 28    | 0      | 0:34.52                  |
| 33 | TRUE   | 28     | 28    | 0      | 0:34.63                  |
| 34 | TRUE   | 28     | 28    | 0      | 0:34.43                  |
| 35 | TRUE   | 28     | 28    | 0      | 0:34.54                  |
| 36 | TRUE   | 32     | 31    | 1      | 0:39.13                  |
| 37 | TRUE   | 32     | 31    | 1      | 0:39.36                  |
| 38 | TRUE   | 32     | 31    | 1      | 0:39.24                  |
| 39 | TRUE   | 28     | 28    | 0      | 0:34.43                  |
| 40 | TRUE   | 28     | 28    | 0      | 0:34.56                  |
| 41 | TRUE   | 28     | 28    | 0      | 0:34.45                  |
| 42 | TRUE   | 28     | 28    | 0      | 0:34.53                  |
| 43 | TRUE   | 28     | 28    | 0      | 0:34.65                  |
| 44 | TRUE   | 32     | 31    | 1      | 0:39.15                  |
| 45 | TRUE   | 28     | 28    | 0      | 0:34.50                  |
| 46 | TRUE   | 28     | 28    | 0      | 0:34.67                  |
| 47 | TRUE   | 28     | 28    | 0      | 0:34.55                  |
| 48 | TRUE   | 28     | 28    | 0      | 0:34.44                  |
| 49 | TRUE   | 28     | 28    | 0      | 0:34.42                  |
| 50 | TRUE   | 28     | 28    | 0      | 0:34.50                  |
| 51 | TRUE   | 28     | 28    | 0      | 0:34.49                  |
| 52 | TRUE   | 28     | 28    | 0      | 0:34.38                  |
| 53 | TRUE   | 28     | 28    | 0      | 0:34.57                  |
| 54 | TRUE   | 28     | 28    | 0      | 0:34.73                  |
| 55 | TRUE   | 28     | 28    | 0      | 0:34.48                  |

| <b>Id</b> | <b>Result</b> | <b>#total</b> | <b>#true</b> | <b>#false</b> | <b>Execution time (min:sec)</b> |
|-----------|---------------|---------------|--------------|---------------|---------------------------------|
| 56        | TRUE          | 28            | 28           | 0             | 0:34.53                         |
| 57        | TRUE          | 32            | 31           | 1             | 0:39.26                         |
| 58        | TRUE          | 28            | 28           | 0             | 0:34.37                         |
| 59        | TRUE          | 28            | 28           | 0             | 0:34.42                         |
| 60        | TRUE          | 28            | 28           | 0             | 0:34.54                         |
| 61        | TRUE          | 28            | 28           | 0             | 0:34.39                         |
| 62        | TRUE          | 28            | 28           | 0             | 0:34.43                         |
| 63        | TRUE          | 28            | 28           | 0             | 0:34.57                         |
| 64        | TRUE          | 28            | 28           | 0             | 0:34.54                         |
| 65        | TRUE          | 28            | 28           | 0             | 0:34.40                         |
| 66        | TRUE          | 28            | 28           | 0             | 0:34.41                         |
| 67        | TRUE          | 28            | 28           | 0             | 0:34.59                         |
| 68        | TRUE          | 28            | 28           | 0             | 0:34.46                         |
| 69        | TRUE          | 28            | 28           | 0             | 0:34.46                         |
| 70        | TRUE          | 32            | 31           | 1             | 0:39.36                         |
| 71        | TRUE          | 28            | 28           | 0             | 0:34.54                         |
| 72        | TRUE          | 28            | 28           | 0             | 0:34.39                         |
| 73        | TRUE          | 28            | 28           | 0             | 0:34.35                         |
| 74        | TRUE          | 28            | 28           | 0             | 0:34.34                         |
| 75        | TRUE          | 28            | 28           | 0             | 0:34.50                         |
| 76        | TRUE          | 39            | 37           | 2             | 0:47.32                         |
| 77        | TRUE          | 28            | 28           | 0             | 0:34.73                         |
| 78        | TRUE          | 28            | 28           | 0             | 0:34.25                         |
| 79        | TRUE          | 28            | 28           | 0             | 0:34.38                         |
| 80        | TRUE          | 28            | 28           | 0             | 0:34.38                         |
| 81        | TRUE          | 28            | 28           | 0             | 0:34.32                         |
| 82        | TRUE          | 28            | 28           | 0             | 0:34.19                         |
| 83        | TRUE          | 28            | 28           | 0             | 0:34.46                         |
| 84        | TRUE          | 28            | 28           | 0             | 0:34.30                         |
| 85        | TRUE          | 28            | 28           | 0             | 0:34.33                         |
| 86        | TRUE          | 28            | 28           | 0             | 0:34.46                         |
| 87        | TRUE          | 28            | 28           | 0             | 0:34.26                         |
| 88        | TRUE          | 28            | 28           | 0             | 0:34.41                         |
| 89        | TRUE          | 28            | 28           | 0             | 0:34.34                         |
| 90        | TRUE          | 28            | 28           | 0             | 0:34.27                         |
| 91        | TRUE          | 28            | 28           | 0             | 0:34.42                         |
| 92        | TRUE          | 28            | 28           | 0             | 0:34.37                         |
| 93        | TRUE          | 28            | 28           | 0             | 0:34.28                         |
| 94        | TRUE          | 28            | 28           | 0             | 0:34.44                         |
| 95        | TRUE          | 28            | 28           | 0             | 0:34.17                         |
| 96        | TRUE          | 28            | 28           | 0             | 0:34.33                         |
| 97        | TRUE          | 28            | 28           | 0             | 0:34.42                         |
| 98        | TRUE          | 28            | 28           | 0             | 0:34.25                         |
| 99        | TRUE          | 28            | 28           | 0             | 0:34.29                         |
| 100       | TRUE          | 28            | 28           | 0             | 0:34.37                         |
| 101       | TRUE          | 28            | 28           | 0             | 0:34.25                         |
| 102       | TRUE          | 28            | 28           | 0             | 0:34.31                         |
| 103       | TRUE          | 28            | 28           | 0             | 0:34.39                         |

| Id  | Result | #total | #true | #false | Execution time (min:sec) |
|-----|--------|--------|-------|--------|--------------------------|
| 104 | TRUE   | 28     | 28    | 0      | 0:34.21                  |
| 105 | TRUE   | 28     | 28    | 0      | 0:34.28                  |
| 106 | TRUE   | 28     | 28    | 0      | 0:34.29                  |
| 107 | TRUE   | 32     | 31    | 1      | 0:39.00                  |
| 108 | TRUE   | 28     | 28    | 0      | 0:34.40                  |
| 109 | TRUE   | 39     | 37    | 2      | 0:47.56                  |
| 110 | TRUE   | 32     | 31    | 1      | 0:39.22                  |
| 111 | TRUE   | 28     | 28    | 0      | 0:34.38                  |
| 112 | TRUE   | 28     | 28    | 0      | 0:34.23                  |
| 113 | TRUE   | 28     | 28    | 0      | 0:34.43                  |
| 114 | TRUE   | 28     | 28    | 0      | 0:34.31                  |
| 115 | TRUE   | 28     | 28    | 0      | 0:34.21                  |
| 116 | TRUE   | 28     | 28    | 0      | 0:34.18                  |
| 117 | TRUE   | 28     | 28    | 0      | 0:34.23                  |
| 118 | TRUE   | 28     | 28    | 0      | 0:34.43                  |
| 119 | TRUE   | 28     | 28    | 0      | 0:34.30                  |
| 120 | TRUE   | 28     | 28    | 0      | 0:34.37                  |
| 121 | TRUE   | 28     | 28    | 0      | 0:34.60                  |
| 122 | TRUE   | 28     | 28    | 0      | 0:34.25                  |
| 123 | TRUE   | 28     | 28    | 0      | 0:34.28                  |
| 124 | TRUE   | 28     | 28    | 0      | 0:34.15                  |
| 125 | TRUE   | 28     | 28    | 0      | 0:34.44                  |
| 126 | TRUE   | 28     | 28    | 0      | 0:34.33                  |
| 127 | TRUE   | 28     | 28    | 0      | 0:34.34                  |
| 128 | TRUE   | 32     | 31    | 1      | 0:38.99                  |
| 129 | TRUE   | 28     | 28    | 0      | 0:34.31                  |
| 130 | TRUE   | 28     | 28    | 0      | 0:34.44                  |
| 131 | TRUE   | 32     | 31    | 1      | 0:39.18                  |
| 132 | TRUE   | 28     | 28    | 0      | 0:34.35                  |
| 133 | TRUE   | 28     | 28    | 0      | 0:34.34                  |
| 134 | TRUE   | 28     | 28    | 0      | 0:34.35                  |
| 135 | TRUE   | 28     | 28    | 0      | 0:34.30                  |
| 136 | TRUE   | 28     | 28    | 0      | 0:34.69                  |
| 137 | TRUE   | 28     | 28    | 0      | 0:34.46                  |
| 138 | TRUE   | 28     | 28    | 0      | 0:34.38                  |
| 139 | TRUE   | 28     | 28    | 0      | 0:34.32                  |
| 140 | TRUE   | 28     | 28    | 0      | 0:34.24                  |
| 141 | TRUE   | 28     | 28    | 0      | 0:34.30                  |
| 142 | TRUE   | 28     | 28    | 0      | 0:34.31                  |
| 143 | TRUE   | 32     | 31    | 1      | 0:39.02                  |
| 144 | TRUE   | 28     | 28    | 0      | 0:34.37                  |
| 145 | TRUE   | 28     | 28    | 0      | 0:34.26                  |
| 146 | TRUE   | 28     | 28    | 0      | 0:34.32                  |
| 147 | TRUE   | 28     | 28    | 0      | 0:34.28                  |
| 148 | TRUE   | 32     | 31    | 1      | 0:39.05                  |
| 149 | TRUE   | 28     | 28    | 0      | 0:34.12                  |
| 150 | TRUE   | 28     | 28    | 0      | 0:34.36                  |
| 151 | TRUE   | 28     | 28    | 0      | 0:34.22                  |

| Id  | Result | #total | #true | #false | Execution time (min:sec) |
|-----|--------|--------|-------|--------|--------------------------|
| 152 | TRUE   | 28     | 28    | 0      | 0:34.29                  |
| 153 | TRUE   | 32     | 31    | 1      | 0:39.02                  |
| 154 | TRUE   | 28     | 28    | 0      | 0:34.24                  |
| 155 | TRUE   | 28     | 28    | 0      | 0:34.35                  |
| 156 | TRUE   | 28     | 28    | 0      | 0:34.35                  |
| 157 | TRUE   | 32     | 31    | 1      | 0:39.12                  |
| 158 | TRUE   | 28     | 28    | 0      | 0:34.21                  |
| 159 | TRUE   | 28     | 28    | 0      | 0:34.13                  |
| 160 | TRUE   | 32     | 31    | 1      | 0:39.23                  |
| 161 | TRUE   | 28     | 28    | 0      | 0:34.19                  |
| 162 | TRUE   | 28     | 28    | 0      | 0:34.35                  |
| 163 | TRUE   | 28     | 28    | 0      | 0:34.26                  |
| 164 | TRUE   | 28     | 28    | 0      | 0:34.39                  |
| 165 | TRUE   | 28     | 28    | 0      | 0:34.38                  |
| 166 | TRUE   | 28     | 28    | 0      | 0:34.54                  |
| 167 | TRUE   | 28     | 28    | 0      | 0:34.46                  |
| 168 | TRUE   | 28     | 28    | 0      | 0:34.19                  |
| 169 | TRUE   | 28     | 28    | 0      | 0:34.26                  |
| 170 | TRUE   | 28     | 28    | 0      | 0:34.45                  |
| 171 | TRUE   | 28     | 28    | 0      | 0:34.35                  |
| 172 | TRUE   | 28     | 28    | 0      | 0:34.29                  |
| 173 | TRUE   | 32     | 31    | 1      | 0:38.99                  |
| 174 | TRUE   | 28     | 28    | 0      | 0:34.44                  |
| 175 | TRUE   | 28     | 28    | 0      | 0:34.28                  |
| 176 | TRUE   | 28     | 28    | 0      | 0:34.36                  |
| 177 | TRUE   | 28     | 28    | 0      | 0:34.33                  |
| 178 | TRUE   | 28     | 28    | 0      | 0:34.32                  |
| 179 | TRUE   | 28     | 28    | 0      | 0:34.28                  |
| 180 | TRUE   | 28     | 28    | 0      | 0:34.48                  |
| 181 | TRUE   | 28     | 28    | 0      | 0:34.21                  |
| 182 | TRUE   | 28     | 28    | 0      | 0:34.33                  |
| 183 | TRUE   | 28     | 28    | 0      | 0:34.34                  |
| 184 | TRUE   | 32     | 31    | 1      | 0:39.04                  |
| 185 | TRUE   | 28     | 28    | 0      | 0:34.42                  |
| 186 | TRUE   | 28     | 28    | 0      | 0:34.30                  |
| 187 | TRUE   | 28     | 28    | 0      | 0:34.23                  |
| 188 | TRUE   | 28     | 28    | 0      | 0:34.27                  |
| 189 | TRUE   | 28     | 28    | 0      | 0:34.26                  |
| 190 | TRUE   | 28     | 28    | 0      | 0:34.23                  |
| 191 | TRUE   | 39     | 37    | 2      | 0:47.21                  |
| 192 | TRUE   | 28     | 28    | 0      | 0:34.17                  |
| 193 | TRUE   | 32     | 31    | 1      | 0:39.27                  |
| 194 | TRUE   | 32     | 31    | 1      | 0:38.86                  |
| 195 | TRUE   | 28     | 28    | 0      | 0:34.24                  |
| 196 | TRUE   | 28     | 28    | 0      | 0:34.27                  |
| 197 | TRUE   | 28     | 28    | 0      | 0:34.38                  |
| 198 | TRUE   | 28     | 28    | 0      | 0:34.28                  |
| 199 | TRUE   | 28     | 28    | 0      | 0:34.44                  |

| <b>Id</b> | <b>Result</b> | <b>#total</b> | <b>#true</b> | <b>#false</b> | <b>Execution time (min:sec)</b> |
|-----------|---------------|---------------|--------------|---------------|---------------------------------|
| 200       | TRUE          | 28            | 28           | 0             | 0:34.28                         |
| 201       | TRUE          | 28            | 28           | 0             | 0:34.22                         |
| 202       | TRUE          | 28            | 28           | 0             | 0:34.24                         |
| 203       | TRUE          | 28            | 28           | 0             | 0:34.21                         |
| 204       | TRUE          | 28            | 28           | 0             | 0:34.28                         |
| 205       | TRUE          | 28            | 28           | 0             | 0:34.29                         |
| 206       | TRUE          | 28            | 28           | 0             | 0:34.30                         |
| 207       | TRUE          | 28            | 28           | 0             | 0:34.22                         |
| 208       | TRUE          | 28            | 28           | 0             | 0:34.39                         |
| 209       | TRUE          | 28            | 28           | 0             | 0:34.23                         |
| 210       | TRUE          | 28            | 28           | 0             | 0:34.20                         |
| 211       | TRUE          | 32            | 31           | 1             | 0:38.90                         |
| 212       | TRUE          | 28            | 28           | 0             | 0:34.20                         |
| 213       | TRUE          | 28            | 28           | 0             | 0:34.29                         |
| 214       | TRUE          | 28            | 28           | 0             | 0:34.22                         |
| 215       | TRUE          | 28            | 28           | 0             | 0:34.23                         |
| 216       | TRUE          | 32            | 31           | 1             | 0:38.99                         |
| 217       | TRUE          | 28            | 28           | 0             | 0:34.45                         |
| 218       | TRUE          | 28            | 28           | 0             | 0:34.28                         |
| 219       | TRUE          | 28            | 28           | 0             | 0:34.32                         |
| 220       | TRUE          | 28            | 28           | 0             | 0:34.50                         |
| 221       | TRUE          | 28            | 28           | 0             | 0:34.26                         |
| 222       | TRUE          | 28            | 28           | 0             | 0:34.29                         |
| 223       | TRUE          | 28            | 28           | 0             | 0:34.22                         |
| 224       | TRUE          | 28            | 28           | 0             | 0:34.36                         |
| 225       | TRUE          | 28            | 28           | 0             | 0:34.20                         |
| 226       | TRUE          | 28            | 28           | 0             | 0:34.28                         |
| 227       | TRUE          | 28            | 28           | 0             | 0:34.31                         |
| 228       | TRUE          | 28            | 28           | 0             | 0:34.21                         |
| 229       | TRUE          | 28            | 28           | 0             | 0:34.46                         |
| 230       | TRUE          | 28            | 28           | 0             | 0:34.35                         |
| 231       | TRUE          | 32            | 31           | 1             | 0:38.93                         |
| 232       | TRUE          | 32            | 31           | 1             | 0:38.90                         |
| 233       | TRUE          | 28            | 28           | 0             | 0:34.18                         |
| 234       | TRUE          | 28            | 28           | 0             | 0:34.20                         |
| 235       | TRUE          | 28            | 28           | 0             | 0:34.29                         |
| 236       | TRUE          | 28            | 28           | 0             | 0:34.35                         |
| 237       | TRUE          | 28            | 28           | 0             | 0:34.21                         |
| 238       | TRUE          | 28            | 28           | 0             | 0:34.15                         |
| 239       | TRUE          | 28            | 28           | 0             | 0:34.31                         |
| 240       | TRUE          | 28            | 28           | 0             | 0:34.28                         |
| 241       | TRUE          | 28            | 28           | 0             | 0:34.33                         |
| 242       | TRUE          | 28            | 28           | 0             | 0:34.30                         |
| 243       | TRUE          | 28            | 28           | 0             | 0:34.18                         |
| 244       | TRUE          | 28            | 28           | 0             | 0:34.21                         |
| 245       | TRUE          | 28            | 28           | 0             | 0:34.17                         |
| 246       | TRUE          | 39            | 37           | 2             | 0:47.26                         |
| 247       | TRUE          | 28            | 28           | 0             | 0:34.23                         |



| <b>Id</b> | <b>Result</b> | <b>#total</b> | <b>#true</b> | <b>#false</b> | <b>Execution time (min:sec)</b> |
|-----------|---------------|---------------|--------------|---------------|---------------------------------|
| 248       | TRUE          | 28            | 28           | 0             | 0:34.18                         |
| 249       | TRUE          | 32            | 31           | 1             | 0:39.07                         |
| 250       | TRUE          | 28            | 28           | 0             | 0:34.17                         |
| 251       | TRUE          | 28            | 28           | 0             | 0:34.22                         |
| 252       | TRUE          | 28            | 28           | 0             | 0:34.37                         |
| 253       | TRUE          | 32            | 31           | 1             | 0:38.86                         |
| 254       | TRUE          | 28            | 28           | 0             | 0:34.26                         |
| 255       | TRUE          | 28            | 28           | 0             | 0:34.14                         |
| 256       | TRUE          | 28            | 28           | 0             | 0:34.13                         |
| 257       | TRUE          | 28            | 28           | 0             | 0:34.21                         |
| 258       | TRUE          | 32            | 31           | 1             | 0:39.24                         |
| 259       | TRUE          | 28            | 28           | 0             | 0:34.32                         |
| 260       | TRUE          | 28            | 28           | 0             | 0:34.28                         |
| 261       | TRUE          | 28            | 28           | 0             | 0:34.27                         |
| 262       | TRUE          | 28            | 28           | 0             | 0:34.24                         |
| 263       | TRUE          | 28            | 28           | 0             | 0:34.25                         |
| 264       | TRUE          | 28            | 28           | 0             | 0:34.36                         |
| 265       | TRUE          | 28            | 28           | 0             | 0:34.25                         |
| 266       | TRUE          | 28            | 28           | 0             | 0:34.27                         |
| 267       | TRUE          | 28            | 28           | 0             | 0:34.28                         |
| 268       | TRUE          | 28            | 28           | 0             | 0:34.24                         |
| 269       | TRUE          | 32            | 31           | 1             | 0:39.05                         |
| 270       | TRUE          | 28            | 28           | 0             | 0:34.29                         |
| 271       | TRUE          | 28            | 28           | 0             | 0:34.28                         |
| 272       | TRUE          | 32            | 31           | 1             | 0:38.95                         |
| 273       | TRUE          | 28            | 28           | 0             | 0:34.28                         |
| 274       | TRUE          | 28            | 28           | 0             | 0:34.23                         |
| 275       | TRUE          | 28            | 28           | 0             | 0:34.33                         |
| 276       | TRUE          | 28            | 28           | 0             | 0:34.32                         |
| 277       | TRUE          | 28            | 28           | 0             | 0:34.19                         |
| 278       | TRUE          | 28            | 28           | 0             | 0:34.14                         |
| 279       | TRUE          | 28            | 28           | 0             | 0:34.29                         |
| 280       | TRUE          | 39            | 37           | 2             | 0:47.28                         |
| 281       | TRUE          | 28            | 28           | 0             | 0:34.29                         |
| 282       | TRUE          | 28            | 28           | 0             | 0:34.34                         |
| 283       | TRUE          | 28            | 28           | 0             | 0:34.38                         |
| 284       | TRUE          | 28            | 28           | 0             | 0:34.58                         |
| 285       | TRUE          | 28            | 28           | 0             | 0:34.21                         |
| 286       | TRUE          | 32            | 31           | 1             | 0:38.99                         |
| 287       | TRUE          | 39            | 37           | 2             | 0:47.36                         |
| 288       | TRUE          | 28            | 28           | 0             | 0:34.38                         |
| 289       | TRUE          | 28            | 28           | 0             | 0:34.29                         |
| 290       | TRUE          | 28            | 28           | 0             | 0:34.33                         |
| 291       | TRUE          | 28            | 28           | 0             | 0:34.18                         |
| 292       | TRUE          | 32            | 31           | 1             | 0:39.11                         |
| 293       | TRUE          | 28            | 28           | 0             | 0:34.09                         |
| 294       | TRUE          | 28            | 28           | 0             | 0:34.20                         |
| 295       | TRUE          | 28            | 28           | 0             | 0:34.35                         |

| Id  | Result | #total | #true | #false | Execution time (min:sec) |
|-----|--------|--------|-------|--------|--------------------------|
| 296 | TRUE   | 32     | 31    | 1      | 0:39.09                  |
| 297 | TRUE   | 28     | 28    | 0      | 0:34.37                  |
| 298 | TRUE   | 28     | 28    | 0      | 0:34.30                  |
| 299 | TRUE   | 28     | 28    | 0      | 0:34.38                  |
| 300 | TRUE   | 28     | 28    | 0      | 0:34.22                  |
| 301 | TRUE   | 28     | 28    | 0      | 0:34.28                  |
| 302 | TRUE   | 28     | 28    | 0      | 0:34.36                  |
| 303 | TRUE   | 28     | 28    | 0      | 0:34.31                  |
| 304 | TRUE   | 28     | 28    | 0      | 0:34.33                  |
| 305 | TRUE   | 28     | 28    | 0      | 0:34.34                  |
| 306 | TRUE   | 28     | 28    | 0      | 0:34.28                  |
| 307 | TRUE   | 28     | 28    | 0      | 0:34.39                  |
| 308 | TRUE   | 28     | 28    | 0      | 0:34.27                  |
| 309 | TRUE   | 32     | 31    | 1      | 0:38.95                  |
| 310 | TRUE   | 28     | 28    | 0      | 0:34.19                  |
| 311 | TRUE   | 28     | 28    | 0      | 0:34.31                  |
| 312 | TRUE   | 28     | 28    | 0      | 0:34.43                  |
| 313 | TRUE   | 28     | 28    | 0      | 0:34.31                  |
| 314 | TRUE   | 28     | 28    | 0      | 0:34.22                  |
| 315 | TRUE   | 32     | 31    | 1      | 0:38.91                  |
| 316 | TRUE   | 32     | 31    | 1      | 0:39.09                  |
| 317 | TRUE   | 28     | 28    | 0      | 0:34.26                  |
| 318 | TRUE   | 28     | 28    | 0      | 0:34.18                  |
| 319 | TRUE   | 28     | 28    | 0      | 0:34.34                  |
| 320 | TRUE   | 28     | 28    | 0      | 0:34.26                  |
| 321 | TRUE   | 28     | 28    | 0      | 0:34.25                  |
| 322 | TRUE   | 28     | 28    | 0      | 0:34.36                  |
| 323 | TRUE   | 28     | 28    | 0      | 0:34.31                  |
| 324 | TRUE   | 28     | 28    | 0      | 0:34.35                  |
| 325 | TRUE   | 28     | 28    | 0      | 0:34.16                  |
| 326 | TRUE   | 28     | 28    | 0      | 0:34.34                  |
| 327 | TRUE   | 28     | 28    | 0      | 0:34.32                  |
| 328 | TRUE   | 28     | 28    | 0      | 0:34.24                  |
| 329 | TRUE   | 28     | 28    | 0      | 0:34.16                  |
| 330 | TRUE   | 28     | 28    | 0      | 0:34.26                  |
| 331 | TRUE   | 28     | 28    | 0      | 0:34.27                  |
| 332 | TRUE   | 28     | 28    | 0      | 0:34.24                  |
| 333 | TRUE   | 28     | 28    | 0      | 0:34.20                  |
| 334 | TRUE   | 28     | 28    | 0      | 0:34.09                  |
| 335 | TRUE   | 28     | 28    | 0      | 0:34.22                  |
| 336 | TRUE   | 28     | 28    | 0      | 0:34.34                  |
| 337 | TRUE   | 28     | 28    | 0      | 0:34.31                  |
| 338 | TRUE   | 28     | 28    | 0      | 0:34.49                  |
| 339 | TRUE   | 32     | 31    | 1      | 0:39.07                  |
| 340 | TRUE   | 28     | 28    | 0      | 0:34.28                  |
| 341 | TRUE   | 28     | 28    | 0      | 0:34.26                  |
| 342 | TRUE   | 32     | 31    | 1      | 0:39.11                  |
| 343 | TRUE   | 28     | 28    | 0      | 0:34.31                  |

| <b>Id</b> | <b>Result</b> | <b>#total</b> | <b>#true</b> | <b>#false</b> | <b>Execution time (min:sec)</b> |
|-----------|---------------|---------------|--------------|---------------|---------------------------------|
| 344       | TRUE          | 32            | 31           | 1             | 0:39.02                         |
| 345       | TRUE          | 28            | 28           | 0             | 0:34.19                         |
| 346       | TRUE          | 28            | 28           | 0             | 0:34.28                         |
| 347       | TRUE          | 28            | 28           | 0             | 0:34.32                         |
| 348       | TRUE          | 28            | 28           | 0             | 0:34.34                         |
| 349       | TRUE          | 28            | 28           | 0             | 0:34.12                         |
| 350       | TRUE          | 28            | 28           | 0             | 0:34.41                         |
| 351       | TRUE          | 28            | 28           | 0             | 0:34.28                         |
| 352       | TRUE          | 39            | 37           | 2             | 0:47.19                         |
| 353       | TRUE          | 28            | 28           | 0             | 0:34.33                         |
| 354       | TRUE          | 32            | 31           | 1             | 0:38.97                         |
| 355       | TRUE          | 28            | 28           | 0             | 0:34.60                         |
| 356       | TRUE          | 28            | 28           | 0             | 0:34.15                         |
| 357       | TRUE          | 32            | 31           | 1             | 0:38.93                         |
| 358       | TRUE          | 28            | 28           | 0             | 0:34.40                         |
| 359       | TRUE          | 32            | 31           | 1             | 0:38.84                         |
| 360       | TRUE          | 32            | 31           | 1             | 0:39.17                         |
| 361       | TRUE          | 28            | 28           | 0             | 0:34.32                         |
| 362       | TRUE          | 28            | 28           | 0             | 0:34.29                         |
| 363       | TRUE          | 28            | 28           | 0             | 0:34.23                         |
| 364       | TRUE          | 32            | 31           | 1             | 0:38.98                         |
| 365       | TRUE          | 28            | 28           | 0             | 0:34.47                         |
| 366       | TRUE          | 28            | 28           | 0             | 0:34.25                         |
| 367       | TRUE          | 28            | 28           | 0             | 0:34.23                         |
| 368       | TRUE          | 28            | 28           | 0             | 0:34.39                         |
| 369       | TRUE          | 32            | 31           | 1             | 0:38.87                         |
| 370       | TRUE          | 28            | 28           | 0             | 0:34.34                         |
| 371       | TRUE          | 28            | 28           | 0             | 0:34.20                         |
| 372       | TRUE          | 28            | 28           | 0             | 0:34.34                         |
| 373       | TRUE          | 28            | 28           | 0             | 0:34.38                         |
| 374       | TRUE          | 28            | 28           | 0             | 0:34.25                         |
| 375       | TRUE          | 28            | 28           | 0             | 0:34.17                         |
| 376       | TRUE          | 28            | 28           | 0             | 0:34.34                         |
| 377       | TRUE          | 32            | 31           | 1             | 0:39.03                         |
| 378       | TRUE          | 28            | 28           | 0             | 0:34.41                         |
| 379       | TRUE          | 39            | 37           | 2             | 0:47.24                         |
| 380       | TRUE          | 28            | 28           | 0             | 0:34.21                         |
| 381       | TRUE          | 28            | 28           | 0             | 0:34.21                         |
| 382       | TRUE          | 28            | 28           | 0             | 0:34.26                         |
| 383       | TRUE          | 28            | 28           | 0             | 0:34.17                         |
| 384       | TRUE          | 32            | 31           | 1             | 0:39.03                         |
| 385       | TRUE          | 28            | 28           | 0             | 0:34.78                         |
| 386       | TRUE          | 28            | 28           | 0             | 0:34.73                         |
| 387       | TRUE          | 28            | 28           | 0             | 0:34.30                         |
| 388       | TRUE          | 28            | 28           | 0             | 0:34.35                         |
| 389       | TRUE          | 28            | 28           | 0             | 0:34.25                         |
| 390       | TRUE          | 28            | 28           | 0             | 0:34.25                         |
| 391       | TRUE          | 28            | 28           | 0             | 0:34.38                         |

| Id  | Result | #total | #true | #false | Execution time (min:sec) |
|-----|--------|--------|-------|--------|--------------------------|
| 392 | TRUE   | 39     | 37    | 2      | 0:47.20                  |
| 393 | TRUE   | 28     | 28    | 0      | 0:34.20                  |
| 394 | TRUE   | 32     | 31    | 1      | 0:38.89                  |
| 395 | TRUE   | 32     | 31    | 1      | 0:38.86                  |
| 396 | TRUE   | 28     | 28    | 0      | 0:34.19                  |
| 397 | TRUE   | 28     | 28    | 0      | 0:34.21                  |
| 398 | TRUE   | 28     | 28    | 0      | 0:34.39                  |
| 399 | TRUE   | 28     | 28    | 0      | 0:34.73                  |
| 400 | TRUE   | 28     | 28    | 0      | 0:34.22                  |
| 401 | TRUE   | 28     | 28    | 0      | 0:34.32                  |
| 402 | TRUE   | 28     | 28    | 0      | 0:34.30                  |
| 403 | TRUE   | 28     | 28    | 0      | 0:34.25                  |
| 404 | TRUE   | 32     | 31    | 1      | 0:39.02                  |
| 405 | TRUE   | 28     | 28    | 0      | 0:34.30                  |
| 406 | TRUE   | 39     | 37    | 2      | 0:47.18                  |
| 407 | TRUE   | 28     | 28    | 0      | 0:34.42                  |
| 408 | TRUE   | 28     | 28    | 0      | 0:34.23                  |
| 409 | TRUE   | 28     | 28    | 0      | 0:34.28                  |
| 410 | TRUE   | 28     | 28    | 0      | 0:34.36                  |
| 411 | TRUE   | 28     | 28    | 0      | 0:34.38                  |
| 412 | TRUE   | 28     | 28    | 0      | 0:34.62                  |
| 413 | TRUE   | 32     | 31    | 1      | 0:39.73                  |
| 414 | TRUE   | 28     | 28    | 0      | 0:34.68                  |
| 415 | TRUE   | 28     | 28    | 0      | 0:34.44                  |
| 416 | TRUE   | 28     | 28    | 0      | 0:34.36                  |
| 417 | TRUE   | 28     | 28    | 0      | 0:34.21                  |
| 418 | TRUE   | 39     | 37    | 2      | 0:47.26                  |
| 419 | TRUE   | 28     | 28    | 0      | 0:34.25                  |
| 420 | TRUE   | 28     | 28    | 0      | 0:34.20                  |
| 421 | TRUE   | 28     | 28    | 0      | 0:34.25                  |
| 422 | TRUE   | 28     | 28    | 0      | 0:34.35                  |
| 423 | TRUE   | 28     | 28    | 0      | 0:34.28                  |
| 424 | TRUE   | 28     | 28    | 0      | 0:34.33                  |
| 425 | TRUE   | 28     | 28    | 0      | 0:34.27                  |
| 426 | TRUE   | 32     | 31    | 1      | 0:39.05                  |
| 427 | TRUE   | 32     | 31    | 1      | 0:39.14                  |
| 428 | TRUE   | 28     | 28    | 0      | 0:34.31                  |
| 429 | TRUE   | 28     | 28    | 0      | 0:34.43                  |
| 430 | TRUE   | 32     | 31    | 1      | 0:39.07                  |
| 431 | TRUE   | 28     | 28    | 0      | 0:34.34                  |
| 432 | TRUE   | 28     | 28    | 0      | 0:34.26                  |
| 433 | TRUE   | 28     | 28    | 0      | 0:34.28                  |
| 434 | TRUE   | 28     | 28    | 0      | 0:34.22                  |
| 435 | TRUE   | 28     | 28    | 0      | 0:34.35                  |
| 436 | TRUE   | 32     | 31    | 1      | 0:38.88                  |
| 437 | TRUE   | 28     | 28    | 0      | 0:34.48                  |
| 438 | TRUE   | 32     | 31    | 1      | 0:39.00                  |
| 439 | TRUE   | 28     | 28    | 0      | 0:34.17                  |

| <b>Id</b> | <b>Result</b> | <b>#total</b> | <b>#true</b> | <b>#false</b> | <b>Execution time (min:sec)</b> |
|-----------|---------------|---------------|--------------|---------------|---------------------------------|
| 440       | TRUE          | 28            | 28           | 0             | 0:34.29                         |
| 441       | TRUE          | 28            | 28           | 0             | 0:34.24                         |
| 442       | TRUE          | 28            | 28           | 0             | 0:34.25                         |
| 443       | TRUE          | 28            | 28           | 0             | 0:34.30                         |
| 444       | TRUE          | 28            | 28           | 0             | 0:34.27                         |
| 445       | TRUE          | 28            | 28           | 0             | 0:34.29                         |
| 446       | TRUE          | 28            | 28           | 0             | 0:34.15                         |
| 447       | TRUE          | 28            | 28           | 0             | 0:34.29                         |
| 448       | TRUE          | 28            | 28           | 0             | 0:34.16                         |
| 449       | TRUE          | 28            | 28           | 0             | 0:34.21                         |
| 450       | TRUE          | 28            | 28           | 0             | 0:34.24                         |
| 451       | TRUE          | 28            | 28           | 0             | 0:34.16                         |
| 452       | TRUE          | 28            | 28           | 0             | 0:34.35                         |
| 453       | TRUE          | 28            | 28           | 0             | 0:34.28                         |
| 454       | TRUE          | 32            | 31           | 1             | 0:38.90                         |
| 455       | TRUE          | 28            | 28           | 0             | 0:34.16                         |
| 456       | TRUE          | 28            | 28           | 0             | 0:34.31                         |
| 457       | TRUE          | 28            | 28           | 0             | 0:34.23                         |
| 458       | TRUE          | 28            | 28           | 0             | 0:34.15                         |
| 459       | TRUE          | 28            | 28           | 0             | 0:34.31                         |
| 460       | TRUE          | 28            | 28           | 0             | 0:34.18                         |
| 461       | TRUE          | 28            | 28           | 0             | 0:34.15                         |
| 462       | TRUE          | 28            | 28           | 0             | 0:34.23                         |
| 463       | TRUE          | 28            | 28           | 0             | 0:34.33                         |
| 464       | TRUE          | 28            | 28           | 0             | 0:34.43                         |
| 465       | TRUE          | 28            | 28           | 0             | 0:34.29                         |
| 466       | TRUE          | 32            | 31           | 1             | 0:39.06                         |
| 467       | TRUE          | 28            | 28           | 0             | 0:34.20                         |
| 468       | TRUE          | 32            | 31           | 1             | 0:39.01                         |
| 469       | TRUE          | 28            | 28           | 0             | 0:34.36                         |
| 470       | TRUE          | 28            | 28           | 0             | 0:34.19                         |
| 471       | TRUE          | 28            | 28           | 0             | 0:34.24                         |
| 472       | TRUE          | 28            | 28           | 0             | 0:34.33                         |
| 473       | TRUE          | 32            | 31           | 1             | 0:38.96                         |
| 474       | TRUE          | 32            | 31           | 1             | 0:39.09                         |
| 475       | TRUE          | 28            | 28           | 0             | 0:34.29                         |
| 476       | TRUE          | 28            | 28           | 0             | 0:34.42                         |
| 477       | TRUE          | 32            | 31           | 1             | 0:38.98                         |
| 478       | TRUE          | 28            | 28           | 0             | 0:34.17                         |
| 479       | TRUE          | 28            | 28           | 0             | 0:34.37                         |
| 480       | TRUE          | 28            | 28           | 0             | 0:34.25                         |
| 481       | TRUE          | 28            | 28           | 0             | 0:34.10                         |
| 482       | TRUE          | 28            | 28           | 0             | 0:34.22                         |
| 483       | TRUE          | 28            | 28           | 0             | 0:34.32                         |
| 484       | TRUE          | 28            | 28           | 0             | 0:34.43                         |
| 485       | TRUE          | 28            | 28           | 0             | 0:34.31                         |
| 486       | TRUE          | 32            | 31           | 1             | 0:39.06                         |
| 487       | TRUE          | 32            | 31           | 1             | 0:39.02                         |

| <b>Id</b> | <b>Result</b> | <b>#total</b> | <b>#true</b> | <b>#false</b> | <b>Execution time (min:sec)</b> |
|-----------|---------------|---------------|--------------|---------------|---------------------------------|
| 488       | TRUE          | 28            | 28           | 0             | 0:34.22                         |
| 489       | TRUE          | 28            | 28           | 0             | 0:34.12                         |
| 490       | TRUE          | 28            | 28           | 0             | 0:34.21                         |
| 491       | TRUE          | 28            | 28           | 0             | 0:34.20                         |
| 492       | TRUE          | 28            | 28           | 0             | 0:34.35                         |
| 493       | TRUE          | 28            | 28           | 0             | 0:34.32                         |
| 494       | TRUE          | 28            | 28           | 0             | 0:34.27                         |
| 495       | TRUE          | 28            | 28           | 0             | 0:34.21                         |
| 496       | TRUE          | 28            | 28           | 0             | 0:34.21                         |
| 497       | TRUE          | 28            | 28           | 0             | 0:34.14                         |
| 498       | TRUE          | 28            | 28           | 0             | 0:34.30                         |
| 499       | TRUE          | 28            | 28           | 0             | 0:34.23                         |
| 500       | TRUE          | 28            | 28           | 0             | 0:34.32                         |

Table 2: Model checking results corresponding to PBLMSTL statement 8

| <b>Id</b> | <b>Result</b> | <b>#total</b> | <b>#true</b> | <b>#false</b> | <b>Execution time (min:sec)</b> |
|-----------|---------------|---------------|--------------|---------------|---------------------------------|
| 1         | TRUE          | 28            | 28           | 0             | 0:34.34                         |
| 2         | TRUE          | 28            | 28           | 0             | 0:34.39                         |
| 3         | TRUE          | 28            | 28           | 0             | 0:34.22                         |
| 4         | TRUE          | 28            | 28           | 0             | 0:34.27                         |
| 5         | TRUE          | 28            | 28           | 0             | 0:34.31                         |
| 6         | TRUE          | 28            | 28           | 0             | 0:34.41                         |
| 7         | TRUE          | 28            | 28           | 0             | 0:34.38                         |
| 8         | TRUE          | 28            | 28           | 0             | 0:34.26                         |
| 9         | TRUE          | 28            | 28           | 0             | 0:34.22                         |
| 10        | TRUE          | 28            | 28           | 0             | 0:34.21                         |
| 11        | TRUE          | 28            | 28           | 0             | 0:34.29                         |
| 12        | TRUE          | 28            | 28           | 0             | 0:34.53                         |
| 13        | TRUE          | 28            | 28           | 0             | 0:34.36                         |
| 14        | TRUE          | 28            | 28           | 0             | 0:34.41                         |
| 15        | TRUE          | 28            | 28           | 0             | 0:34.67                         |
| 16        | TRUE          | 28            | 28           | 0             | 0:34.30                         |
| 17        | TRUE          | 28            | 28           | 0             | 0:34.34                         |
| 18        | TRUE          | 28            | 28           | 0             | 0:34.42                         |
| 19        | TRUE          | 28            | 28           | 0             | 0:34.34                         |
| 20        | TRUE          | 28            | 28           | 0             | 0:34.38                         |
| 21        | TRUE          | 28            | 28           | 0             | 0:34.31                         |
| 22        | TRUE          | 28            | 28           | 0             | 0:34.29                         |
| 23        | TRUE          | 28            | 28           | 0             | 0:34.41                         |
| 24        | TRUE          | 28            | 28           | 0             | 0:34.23                         |
| 25        | TRUE          | 28            | 28           | 0             | 0:34.40                         |
| 26        | TRUE          | 28            | 28           | 0             | 0:34.27                         |
| 27        | TRUE          | 28            | 28           | 0             | 0:34.45                         |
| 28        | TRUE          | 28            | 28           | 0             | 0:34.45                         |

| <b>Id</b> | <b>Result</b> | <b>#total</b> | <b>#true</b> | <b>#false</b> | <b>Execution time (min:sec)</b> |
|-----------|---------------|---------------|--------------|---------------|---------------------------------|
| 29        | TRUE          | 28            | 28           | 0             | 0:34.45                         |
| 30        | TRUE          | 28            | 28           | 0             | 0:34.40                         |
| 31        | TRUE          | 28            | 28           | 0             | 0:34.39                         |
| 32        | TRUE          | 28            | 28           | 0             | 0:34.39                         |
| 33        | TRUE          | 28            | 28           | 0             | 0:34.22                         |
| 34        | TRUE          | 28            | 28           | 0             | 0:34.35                         |
| 35        | TRUE          | 28            | 28           | 0             | 0:34.38                         |
| 36        | TRUE          | 28            | 28           | 0             | 0:34.31                         |
| 37        | TRUE          | 28            | 28           | 0             | 0:34.38                         |
| 38        | TRUE          | 28            | 28           | 0             | 0:34.48                         |
| 39        | TRUE          | 28            | 28           | 0             | 0:34.34                         |
| 40        | TRUE          | 28            | 28           | 0             | 0:34.44                         |
| 41        | TRUE          | 28            | 28           | 0             | 0:34.27                         |
| 42        | TRUE          | 28            | 28           | 0             | 0:34.47                         |
| 43        | TRUE          | 28            | 28           | 0             | 0:34.39                         |
| 44        | TRUE          | 28            | 28           | 0             | 0:34.40                         |
| 45        | TRUE          | 28            | 28           | 0             | 0:34.45                         |
| 46        | TRUE          | 28            | 28           | 0             | 0:34.41                         |
| 47        | TRUE          | 28            | 28           | 0             | 0:34.38                         |
| 48        | TRUE          | 28            | 28           | 0             | 0:34.28                         |
| 49        | TRUE          | 28            | 28           | 0             | 0:34.26                         |
| 50        | TRUE          | 28            | 28           | 0             | 0:34.46                         |
| 51        | TRUE          | 28            | 28           | 0             | 0:34.47                         |
| 52        | TRUE          | 28            | 28           | 0             | 0:34.37                         |
| 53        | TRUE          | 28            | 28           | 0             | 0:34.34                         |
| 54        | TRUE          | 28            | 28           | 0             | 0:34.40                         |
| 55        | TRUE          | 28            | 28           | 0             | 0:34.32                         |
| 56        | TRUE          | 28            | 28           | 0             | 0:34.42                         |
| 57        | TRUE          | 28            | 28           | 0             | 0:34.36                         |
| 58        | TRUE          | 28            | 28           | 0             | 0:34.37                         |
| 59        | TRUE          | 28            | 28           | 0             | 0:34.36                         |
| 60        | TRUE          | 28            | 28           | 0             | 0:34.45                         |
| 61        | TRUE          | 28            | 28           | 0             | 0:34.26                         |
| 62        | TRUE          | 28            | 28           | 0             | 0:34.27                         |
| 63        | TRUE          | 28            | 28           | 0             | 0:34.44                         |
| 64        | TRUE          | 28            | 28           | 0             | 0:34.33                         |
| 65        | TRUE          | 28            | 28           | 0             | 0:34.25                         |
| 66        | TRUE          | 28            | 28           | 0             | 0:34.44                         |
| 67        | TRUE          | 28            | 28           | 0             | 0:34.42                         |
| 68        | TRUE          | 28            | 28           | 0             | 0:34.41                         |
| 69        | TRUE          | 28            | 28           | 0             | 0:34.35                         |
| 70        | TRUE          | 28            | 28           | 0             | 0:34.29                         |
| 71        | TRUE          | 28            | 28           | 0             | 0:34.23                         |
| 72        | TRUE          | 28            | 28           | 0             | 0:34.41                         |
| 73        | TRUE          | 28            | 28           | 0             | 0:34.26                         |
| 74        | TRUE          | 28            | 28           | 0             | 0:34.17                         |
| 75        | TRUE          | 28            | 28           | 0             | 0:34.35                         |
| 76        | TRUE          | 28            | 28           | 0             | 0:34.57                         |

| Id  | Result | #total | #true | #false | Execution time (min:sec) |
|-----|--------|--------|-------|--------|--------------------------|
| 77  | TRUE   | 28     | 28    | 0      | 0:34.31                  |
| 78  | TRUE   | 28     | 28    | 0      | 0:34.18                  |
| 79  | TRUE   | 28     | 28    | 0      | 0:34.27                  |
| 80  | TRUE   | 28     | 28    | 0      | 0:34.32                  |
| 81  | TRUE   | 28     | 28    | 0      | 0:34.29                  |
| 82  | TRUE   | 28     | 28    | 0      | 0:34.41                  |
| 83  | TRUE   | 28     | 28    | 0      | 0:34.33                  |
| 84  | TRUE   | 28     | 28    | 0      | 0:34.54                  |
| 85  | TRUE   | 28     | 28    | 0      | 0:34.38                  |
| 86  | TRUE   | 28     | 28    | 0      | 0:34.36                  |
| 87  | TRUE   | 28     | 28    | 0      | 0:34.37                  |
| 88  | TRUE   | 28     | 28    | 0      | 0:34.37                  |
| 89  | TRUE   | 28     | 28    | 0      | 0:34.32                  |
| 90  | TRUE   | 28     | 28    | 0      | 0:34.25                  |
| 91  | TRUE   | 28     | 28    | 0      | 0:34.31                  |
| 92  | TRUE   | 28     | 28    | 0      | 0:34.25                  |
| 93  | TRUE   | 28     | 28    | 0      | 0:34.29                  |
| 94  | TRUE   | 28     | 28    | 0      | 0:34.21                  |
| 95  | TRUE   | 28     | 28    | 0      | 0:34.35                  |
| 96  | TRUE   | 28     | 28    | 0      | 0:34.47                  |
| 97  | TRUE   | 28     | 28    | 0      | 0:34.25                  |
| 98  | TRUE   | 28     | 28    | 0      | 0:34.22                  |
| 99  | TRUE   | 28     | 28    | 0      | 0:34.26                  |
| 100 | TRUE   | 28     | 28    | 0      | 0:34.25                  |
| 101 | TRUE   | 28     | 28    | 0      | 0:34.34                  |
| 102 | TRUE   | 28     | 28    | 0      | 0:34.39                  |
| 103 | TRUE   | 28     | 28    | 0      | 0:34.41                  |
| 104 | TRUE   | 28     | 28    | 0      | 0:34.34                  |
| 105 | TRUE   | 28     | 28    | 0      | 0:34.42                  |
| 106 | TRUE   | 28     | 28    | 0      | 0:34.29                  |
| 107 | TRUE   | 28     | 28    | 0      | 0:34.22                  |
| 108 | TRUE   | 28     | 28    | 0      | 0:34.36                  |
| 109 | TRUE   | 28     | 28    | 0      | 0:34.37                  |
| 110 | TRUE   | 28     | 28    | 0      | 0:34.20                  |
| 111 | TRUE   | 28     | 28    | 0      | 0:34.09                  |
| 112 | TRUE   | 28     | 28    | 0      | 0:34.23                  |
| 113 | TRUE   | 28     | 28    | 0      | 0:34.11                  |
| 114 | TRUE   | 28     | 28    | 0      | 0:34.08                  |
| 115 | TRUE   | 28     | 28    | 0      | 0:34.16                  |
| 116 | TRUE   | 28     | 28    | 0      | 0:34.27                  |
| 117 | TRUE   | 28     | 28    | 0      | 0:34.16                  |
| 118 | TRUE   | 28     | 28    | 0      | 0:34.21                  |
| 119 | TRUE   | 28     | 28    | 0      | 0:34.18                  |
| 120 | TRUE   | 28     | 28    | 0      | 0:34.27                  |
| 121 | TRUE   | 28     | 28    | 0      | 0:34.15                  |
| 122 | TRUE   | 28     | 28    | 0      | 0:34.30                  |
| 123 | TRUE   | 28     | 28    | 0      | 0:34.26                  |
| 124 | TRUE   | 28     | 28    | 0      | 0:34.19                  |



| <b>Id</b> | <b>Result</b> | <b>#total</b> | <b>#true</b> | <b>#false</b> | <b>Execution time (min:sec)</b> |
|-----------|---------------|---------------|--------------|---------------|---------------------------------|
| 125       | TRUE          | 28            | 28           | 0             | 0:34.26                         |
| 126       | TRUE          | 28            | 28           | 0             | 0:34.29                         |
| 127       | TRUE          | 28            | 28           | 0             | 0:34.28                         |
| 128       | TRUE          | 28            | 28           | 0             | 0:34.13                         |
| 129       | TRUE          | 28            | 28           | 0             | 0:34.29                         |
| 130       | TRUE          | 28            | 28           | 0             | 0:34.11                         |
| 131       | TRUE          | 28            | 28           | 0             | 0:34.24                         |
| 132       | TRUE          | 28            | 28           | 0             | 0:34.24                         |
| 133       | TRUE          | 28            | 28           | 0             | 0:34.23                         |
| 134       | TRUE          | 28            | 28           | 0             | 0:34.14                         |
| 135       | TRUE          | 28            | 28           | 0             | 0:34.37                         |
| 136       | TRUE          | 28            | 28           | 0             | 0:34.18                         |
| 137       | TRUE          | 28            | 28           | 0             | 0:34.35                         |
| 138       | TRUE          | 28            | 28           | 0             | 0:34.21                         |
| 139       | TRUE          | 28            | 28           | 0             | 0:34.15                         |
| 140       | TRUE          | 28            | 28           | 0             | 0:34.13                         |
| 141       | TRUE          | 28            | 28           | 0             | 0:34.54                         |
| 142       | TRUE          | 28            | 28           | 0             | 0:35.43                         |
| 143       | TRUE          | 28            | 28           | 0             | 0:35.51                         |
| 144       | TRUE          | 28            | 28           | 0             | 0:35.44                         |
| 145       | TRUE          | 28            | 28           | 0             | 0:35.36                         |
| 146       | TRUE          | 28            | 28           | 0             | 0:36.01                         |
| 147       | TRUE          | 28            | 28           | 0             | 0:37.82                         |
| 148       | TRUE          | 28            | 28           | 0             | 0:37.12                         |
| 149       | TRUE          | 28            | 28           | 0             | 0:36.55                         |
| 150       | TRUE          | 28            | 28           | 0             | 0:36.58                         |
| 151       | TRUE          | 28            | 28           | 0             | 0:36.55                         |
| 152       | TRUE          | 28            | 28           | 0             | 0:36.50                         |
| 153       | TRUE          | 28            | 28           | 0             | 0:36.52                         |
| 154       | TRUE          | 28            | 28           | 0             | 0:36.51                         |
| 155       | TRUE          | 28            | 28           | 0             | 0:36.63                         |
| 156       | TRUE          | 28            | 28           | 0             | 0:36.55                         |
| 157       | TRUE          | 28            | 28           | 0             | 0:36.61                         |
| 158       | TRUE          | 28            | 28           | 0             | 0:36.75                         |
| 159       | TRUE          | 28            | 28           | 0             | 0:36.71                         |
| 160       | TRUE          | 28            | 28           | 0             | 0:36.60                         |
| 161       | TRUE          | 28            | 28           | 0             | 0:36.59                         |
| 162       | TRUE          | 28            | 28           | 0             | 0:36.75                         |
| 163       | TRUE          | 28            | 28           | 0             | 0:36.62                         |
| 164       | TRUE          | 28            | 28           | 0             | 0:36.54                         |
| 165       | TRUE          | 28            | 28           | 0             | 0:36.49                         |
| 166       | TRUE          | 28            | 28           | 0             | 0:36.55                         |
| 167       | TRUE          | 28            | 28           | 0             | 0:36.82                         |
| 168       | TRUE          | 28            | 28           | 0             | 0:36.62                         |
| 169       | TRUE          | 28            | 28           | 0             | 0:36.38                         |
| 170       | TRUE          | 28            | 28           | 0             | 0:36.56                         |
| 171       | TRUE          | 28            | 28           | 0             | 0:36.47                         |
| 172       | TRUE          | 28            | 28           | 0             | 0:36.69                         |

| <b>Id</b> | <b>Result</b> | <b>#total</b> | <b>#true</b> | <b>#false</b> | <b>Execution time (min:sec)</b> |
|-----------|---------------|---------------|--------------|---------------|---------------------------------|
| 173       | TRUE          | 28            | 28           | 0             | 0:36.49                         |
| 174       | TRUE          | 28            | 28           | 0             | 0:36.45                         |
| 175       | TRUE          | 28            | 28           | 0             | 0:36.54                         |
| 176       | TRUE          | 28            | 28           | 0             | 0:36.47                         |
| 177       | TRUE          | 28            | 28           | 0             | 0:36.63                         |
| 178       | TRUE          | 28            | 28           | 0             | 0:36.55                         |
| 179       | TRUE          | 28            | 28           | 0             | 0:36.51                         |
| 180       | TRUE          | 28            | 28           | 0             | 0:36.34                         |
| 181       | TRUE          | 28            | 28           | 0             | 0:37.21                         |
| 182       | TRUE          | 28            | 28           | 0             | 0:37.25                         |
| 183       | TRUE          | 28            | 28           | 0             | 0:37.69                         |
| 184       | TRUE          | 28            | 28           | 0             | 0:37.38                         |
| 185       | TRUE          | 28            | 28           | 0             | 0:37.53                         |
| 186       | TRUE          | 28            | 28           | 0             | 0:37.68                         |
| 187       | TRUE          | 28            | 28           | 0             | 0:37.62                         |
| 188       | TRUE          | 28            | 28           | 0             | 0:37.38                         |
| 189       | TRUE          | 28            | 28           | 0             | 0:37.79                         |
| 190       | TRUE          | 28            | 28           | 0             | 0:37.55                         |
| 191       | TRUE          | 28            | 28           | 0             | 0:37.32                         |
| 192       | TRUE          | 28            | 28           | 0             | 0:37.40                         |
| 193       | TRUE          | 28            | 28           | 0             | 0:37.53                         |
| 194       | TRUE          | 28            | 28           | 0             | 0:38.29                         |
| 195       | TRUE          | 28            | 28           | 0             | 0:37.46                         |
| 196       | TRUE          | 28            | 28           | 0             | 0:37.69                         |
| 197       | TRUE          | 28            | 28           | 0             | 0:37.74                         |
| 198       | TRUE          | 28            | 28           | 0             | 0:38.36                         |
| 199       | TRUE          | 28            | 28           | 0             | 0:37.54                         |
| 200       | TRUE          | 28            | 28           | 0             | 0:37.61                         |
| 201       | TRUE          | 28            | 28           | 0             | 0:37.48                         |
| 202       | TRUE          | 28            | 28           | 0             | 0:37.68                         |
| 203       | TRUE          | 28            | 28           | 0             | 0:37.11                         |
| 204       | TRUE          | 28            | 28           | 0             | 0:37.86                         |
| 205       | TRUE          | 28            | 28           | 0             | 0:37.29                         |
| 206       | TRUE          | 28            | 28           | 0             | 0:37.64                         |
| 207       | TRUE          | 28            | 28           | 0             | 0:37.46                         |
| 208       | TRUE          | 28            | 28           | 0             | 0:35.43                         |
| 209       | TRUE          | 28            | 28           | 0             | 0:35.76                         |
| 210       | TRUE          | 28            | 28           | 0             | 0:35.62                         |
| 211       | TRUE          | 28            | 28           | 0             | 0:35.55                         |
| 212       | TRUE          | 28            | 28           | 0             | 0:35.53                         |
| 213       | TRUE          | 28            | 28           | 0             | 0:35.77                         |
| 214       | TRUE          | 28            | 28           | 0             | 0:35.74                         |
| 215       | TRUE          | 28            | 28           | 0             | 0:35.68                         |
| 216       | TRUE          | 28            | 28           | 0             | 0:35.87                         |
| 217       | TRUE          | 28            | 28           | 0             | 0:35.72                         |
| 218       | TRUE          | 28            | 28           | 0             | 0:35.67                         |
| 219       | TRUE          | 28            | 28           | 0             | 0:35.55                         |
| 220       | TRUE          | 28            | 28           | 0             | 0:35.71                         |

| <b>Id</b> | <b>Result</b> | <b>#total</b> | <b>#true</b> | <b>#false</b> | <b>Execution time (min:sec)</b> |
|-----------|---------------|---------------|--------------|---------------|---------------------------------|
| 221       | TRUE          | 28            | 28           | 0             | 0:35.85                         |
| 222       | TRUE          | 28            | 28           | 0             | 0:35.76                         |
| 223       | TRUE          | 28            | 28           | 0             | 0:35.86                         |
| 224       | TRUE          | 28            | 28           | 0             | 0:35.82                         |
| 225       | TRUE          | 28            | 28           | 0             | 0:35.86                         |
| 226       | TRUE          | 28            | 28           | 0             | 0:35.70                         |
| 227       | TRUE          | 28            | 28           | 0             | 0:35.80                         |
| 228       | TRUE          | 28            | 28           | 0             | 0:35.53                         |
| 229       | TRUE          | 28            | 28           | 0             | 0:35.95                         |
| 230       | TRUE          | 28            | 28           | 0             | 0:35.89                         |
| 231       | TRUE          | 28            | 28           | 0             | 0:35.83                         |
| 232       | TRUE          | 28            | 28           | 0             | 0:35.71                         |
| 233       | TRUE          | 28            | 28           | 0             | 0:35.84                         |
| 234       | TRUE          | 28            | 28           | 0             | 0:35.60                         |
| 235       | TRUE          | 28            | 28           | 0             | 0:35.65                         |
| 236       | TRUE          | 28            | 28           | 0             | 0:35.83                         |
| 237       | TRUE          | 28            | 28           | 0             | 0:35.75                         |
| 238       | TRUE          | 28            | 28           | 0             | 0:35.93                         |
| 239       | TRUE          | 28            | 28           | 0             | 0:35.98                         |
| 240       | TRUE          | 28            | 28           | 0             | 0:36.01                         |
| 241       | TRUE          | 28            | 28           | 0             | 0:35.55                         |
| 242       | TRUE          | 28            | 28           | 0             | 0:35.90                         |
| 243       | TRUE          | 28            | 28           | 0             | 0:36.00                         |
| 244       | TRUE          | 28            | 28           | 0             | 0:36.30                         |
| 245       | TRUE          | 28            | 28           | 0             | 0:35.83                         |
| 246       | TRUE          | 28            | 28           | 0             | 0:35.69                         |
| 247       | TRUE          | 28            | 28           | 0             | 0:36.05                         |
| 248       | TRUE          | 28            | 28           | 0             | 0:35.68                         |
| 249       | TRUE          | 28            | 28           | 0             | 0:35.96                         |
| 250       | TRUE          | 28            | 28           | 0             | 0:35.76                         |
| 251       | TRUE          | 28            | 28           | 0             | 0:35.75                         |
| 252       | TRUE          | 28            | 28           | 0             | 0:35.89                         |
| 253       | TRUE          | 28            | 28           | 0             | 0:35.63                         |
| 254       | TRUE          | 28            | 28           | 0             | 0:35.76                         |
| 255       | TRUE          | 28            | 28           | 0             | 0:35.57                         |
| 256       | TRUE          | 28            | 28           | 0             | 0:35.77                         |
| 257       | TRUE          | 28            | 28           | 0             | 0:35.75                         |
| 258       | TRUE          | 28            | 28           | 0             | 0:36.13                         |
| 259       | TRUE          | 28            | 28           | 0             | 0:35.74                         |
| 260       | TRUE          | 28            | 28           | 0             | 0:35.67                         |
| 261       | TRUE          | 28            | 28           | 0             | 0:35.93                         |
| 262       | TRUE          | 28            | 28           | 0             | 0:35.95                         |
| 263       | TRUE          | 28            | 28           | 0             | 0:35.73                         |
| 264       | TRUE          | 28            | 28           | 0             | 0:35.77                         |
| 265       | TRUE          | 28            | 28           | 0             | 0:35.94                         |
| 266       | TRUE          | 28            | 28           | 0             | 0:35.49                         |
| 267       | TRUE          | 28            | 28           | 0             | 0:35.52                         |
| 268       | TRUE          | 28            | 28           | 0             | 0:35.64                         |

| <b>Id</b> | <b>Result</b> | <b>#total</b> | <b>#true</b> | <b>#false</b> | <b>Execution time (min:sec)</b> |
|-----------|---------------|---------------|--------------|---------------|---------------------------------|
| 269       | TRUE          | 28            | 28           | 0             | 0:35.61                         |
| 270       | TRUE          | 28            | 28           | 0             | 0:36.25                         |
| 271       | TRUE          | 28            | 28           | 0             | 0:35.54                         |
| 272       | TRUE          | 28            | 28           | 0             | 0:36.06                         |
| 273       | TRUE          | 28            | 28           | 0             | 0:35.85                         |
| 274       | TRUE          | 28            | 28           | 0             | 0:35.83                         |
| 275       | TRUE          | 28            | 28           | 0             | 0:35.78                         |
| 276       | TRUE          | 28            | 28           | 0             | 0:35.81                         |
| 277       | TRUE          | 28            | 28           | 0             | 0:35.94                         |
| 278       | TRUE          | 28            | 28           | 0             | 0:35.77                         |
| 279       | TRUE          | 28            | 28           | 0             | 0:35.71                         |
| 280       | TRUE          | 28            | 28           | 0             | 0:35.86                         |
| 281       | TRUE          | 28            | 28           | 0             | 0:35.79                         |
| 282       | TRUE          | 28            | 28           | 0             | 0:35.80                         |
| 283       | TRUE          | 28            | 28           | 0             | 0:35.74                         |
| 284       | TRUE          | 28            | 28           | 0             | 0:35.86                         |
| 285       | TRUE          | 28            | 28           | 0             | 0:35.68                         |
| 286       | TRUE          | 28            | 28           | 0             | 0:35.78                         |
| 287       | TRUE          | 28            | 28           | 0             | 0:35.93                         |
| 288       | TRUE          | 28            | 28           | 0             | 0:35.85                         |
| 289       | TRUE          | 28            | 28           | 0             | 0:35.79                         |
| 290       | TRUE          | 28            | 28           | 0             | 0:35.83                         |
| 291       | TRUE          | 28            | 28           | 0             | 0:35.64                         |
| 292       | TRUE          | 28            | 28           | 0             | 0:35.87                         |
| 293       | TRUE          | 28            | 28           | 0             | 0:35.73                         |
| 294       | TRUE          | 28            | 28           | 0             | 0:35.76                         |
| 295       | TRUE          | 28            | 28           | 0             | 0:35.66                         |
| 296       | TRUE          | 28            | 28           | 0             | 0:35.81                         |
| 297       | TRUE          | 28            | 28           | 0             | 0:35.88                         |
| 298       | TRUE          | 28            | 28           | 0             | 0:35.50                         |
| 299       | TRUE          | 28            | 28           | 0             | 0:36.10                         |
| 300       | TRUE          | 28            | 28           | 0             | 0:35.70                         |
| 301       | TRUE          | 28            | 28           | 0             | 0:35.68                         |
| 302       | TRUE          | 28            | 28           | 0             | 0:35.61                         |
| 303       | TRUE          | 28            | 28           | 0             | 0:35.81                         |
| 304       | TRUE          | 28            | 28           | 0             | 0:35.54                         |
| 305       | TRUE          | 28            | 28           | 0             | 0:35.58                         |
| 306       | TRUE          | 28            | 28           | 0             | 0:35.47                         |
| 307       | TRUE          | 28            | 28           | 0             | 0:35.78                         |
| 308       | TRUE          | 28            | 28           | 0             | 0:35.75                         |
| 309       | TRUE          | 28            | 28           | 0             | 0:35.57                         |
| 310       | TRUE          | 28            | 28           | 0             | 0:35.69                         |
| 311       | TRUE          | 28            | 28           | 0             | 0:35.87                         |
| 312       | TRUE          | 28            | 28           | 0             | 0:35.58                         |
| 313       | TRUE          | 28            | 28           | 0             | 0:35.89                         |
| 314       | TRUE          | 28            | 28           | 0             | 0:35.59                         |
| 315       | TRUE          | 28            | 28           | 0             | 0:35.91                         |
| 316       | TRUE          | 28            | 28           | 0             | 0:35.69                         |

| Id  | Result | #total | #true | #false | Execution time (min:sec) |
|-----|--------|--------|-------|--------|--------------------------|
| 317 | TRUE   | 28     | 28    | 0      | 0:35.79                  |
| 318 | TRUE   | 28     | 28    | 0      | 0:35.73                  |
| 319 | TRUE   | 28     | 28    | 0      | 0:35.52                  |
| 320 | TRUE   | 28     | 28    | 0      | 0:35.72                  |
| 321 | TRUE   | 28     | 28    | 0      | 0:35.61                  |
| 322 | TRUE   | 28     | 28    | 0      | 0:35.64                  |
| 323 | TRUE   | 28     | 28    | 0      | 0:35.55                  |
| 324 | TRUE   | 28     | 28    | 0      | 0:35.90                  |
| 325 | TRUE   | 28     | 28    | 0      | 0:35.74                  |
| 326 | TRUE   | 28     | 28    | 0      | 0:35.73                  |
| 327 | TRUE   | 28     | 28    | 0      | 0:35.77                  |
| 328 | TRUE   | 28     | 28    | 0      | 0:35.58                  |
| 329 | TRUE   | 28     | 28    | 0      | 0:35.77                  |
| 330 | TRUE   | 28     | 28    | 0      | 0:35.56                  |
| 331 | TRUE   | 28     | 28    | 0      | 0:35.78                  |
| 332 | TRUE   | 28     | 28    | 0      | 0:35.60                  |
| 333 | TRUE   | 28     | 28    | 0      | 0:35.60                  |
| 334 | TRUE   | 28     | 28    | 0      | 0:35.80                  |
| 335 | TRUE   | 28     | 28    | 0      | 0:35.81                  |
| 336 | TRUE   | 28     | 28    | 0      | 0:35.75                  |
| 337 | TRUE   | 28     | 28    | 0      | 0:35.50                  |
| 338 | TRUE   | 28     | 28    | 0      | 0:35.87                  |
| 339 | TRUE   | 28     | 28    | 0      | 0:35.52                  |
| 340 | TRUE   | 28     | 28    | 0      | 0:35.57                  |
| 341 | TRUE   | 28     | 28    | 0      | 0:35.78                  |
| 342 | TRUE   | 28     | 28    | 0      | 0:35.67                  |
| 343 | TRUE   | 28     | 28    | 0      | 0:35.72                  |
| 344 | TRUE   | 28     | 28    | 0      | 0:35.67                  |
| 345 | TRUE   | 28     | 28    | 0      | 0:35.95                  |
| 346 | TRUE   | 28     | 28    | 0      | 0:35.57                  |
| 347 | TRUE   | 28     | 28    | 0      | 0:35.70                  |
| 348 | TRUE   | 28     | 28    | 0      | 0:35.75                  |
| 349 | TRUE   | 28     | 28    | 0      | 0:35.68                  |
| 350 | TRUE   | 28     | 28    | 0      | 0:35.52                  |
| 351 | TRUE   | 28     | 28    | 0      | 0:35.79                  |
| 352 | TRUE   | 28     | 28    | 0      | 0:35.75                  |
| 353 | TRUE   | 28     | 28    | 0      | 0:35.62                  |
| 354 | TRUE   | 28     | 28    | 0      | 0:35.68                  |
| 355 | TRUE   | 28     | 28    | 0      | 0:35.82                  |
| 356 | TRUE   | 28     | 28    | 0      | 0:35.71                  |
| 357 | TRUE   | 28     | 28    | 0      | 0:35.51                  |
| 358 | TRUE   | 28     | 28    | 0      | 0:35.47                  |
| 359 | TRUE   | 28     | 28    | 0      | 0:35.95                  |
| 360 | TRUE   | 28     | 28    | 0      | 0:35.64                  |
| 361 | TRUE   | 28     | 28    | 0      | 0:35.70                  |
| 362 | TRUE   | 28     | 28    | 0      | 0:35.65                  |
| 363 | TRUE   | 28     | 28    | 0      | 0:35.73                  |
| 364 | TRUE   | 28     | 28    | 0      | 0:35.71                  |

| Id  | Result | #total | #true | #false | Execution time (min:sec) |
|-----|--------|--------|-------|--------|--------------------------|
| 365 | TRUE   | 28     | 28    | 0      | 0:35.81                  |
| 366 | TRUE   | 28     | 28    | 0      | 0:35.90                  |
| 367 | TRUE   | 28     | 28    | 0      | 0:35.49                  |
| 368 | TRUE   | 28     | 28    | 0      | 0:35.57                  |
| 369 | TRUE   | 28     | 28    | 0      | 0:35.65                  |
| 370 | TRUE   | 28     | 28    | 0      | 0:36.27                  |
| 371 | TRUE   | 28     | 28    | 0      | 0:35.87                  |
| 372 | TRUE   | 28     | 28    | 0      | 0:35.66                  |
| 373 | TRUE   | 28     | 28    | 0      | 0:35.77                  |
| 374 | TRUE   | 28     | 28    | 0      | 0:36.11                  |
| 375 | TRUE   | 28     | 28    | 0      | 0:35.62                  |
| 376 | TRUE   | 28     | 28    | 0      | 0:35.47                  |
| 377 | TRUE   | 28     | 28    | 0      | 0:35.93                  |
| 378 | TRUE   | 28     | 28    | 0      | 0:35.44                  |
| 379 | TRUE   | 28     | 28    | 0      | 0:35.86                  |
| 380 | TRUE   | 28     | 28    | 0      | 0:35.80                  |
| 381 | TRUE   | 28     | 28    | 0      | 0:35.76                  |
| 382 | TRUE   | 28     | 28    | 0      | 0:35.92                  |
| 383 | TRUE   | 28     | 28    | 0      | 0:35.90                  |
| 384 | TRUE   | 28     | 28    | 0      | 0:35.64                  |
| 385 | TRUE   | 28     | 28    | 0      | 0:35.80                  |
| 386 | TRUE   | 28     | 28    | 0      | 0:35.71                  |
| 387 | TRUE   | 28     | 28    | 0      | 0:35.71                  |
| 388 | TRUE   | 28     | 28    | 0      | 0:35.66                  |
| 389 | TRUE   | 28     | 28    | 0      | 0:35.79                  |
| 390 | TRUE   | 28     | 28    | 0      | 0:35.91                  |
| 391 | TRUE   | 28     | 28    | 0      | 0:35.89                  |
| 392 | TRUE   | 28     | 28    | 0      | 0:35.53                  |
| 393 | TRUE   | 28     | 28    | 0      | 0:35.57                  |
| 394 | TRUE   | 28     | 28    | 0      | 0:35.78                  |
| 395 | TRUE   | 28     | 28    | 0      | 0:35.52                  |
| 396 | TRUE   | 28     | 28    | 0      | 0:35.65                  |
| 397 | TRUE   | 28     | 28    | 0      | 0:35.70                  |
| 398 | TRUE   | 28     | 28    | 0      | 0:35.93                  |
| 399 | TRUE   | 28     | 28    | 0      | 0:35.63                  |
| 400 | TRUE   | 28     | 28    | 0      | 0:35.86                  |
| 401 | TRUE   | 28     | 28    | 0      | 0:35.65                  |
| 402 | TRUE   | 28     | 28    | 0      | 0:35.82                  |
| 403 | TRUE   | 28     | 28    | 0      | 0:35.65                  |
| 404 | TRUE   | 28     | 28    | 0      | 0:35.76                  |
| 405 | TRUE   | 28     | 28    | 0      | 0:35.68                  |
| 406 | TRUE   | 28     | 28    | 0      | 0:35.58                  |
| 407 | TRUE   | 28     | 28    | 0      | 0:35.75                  |
| 408 | TRUE   | 28     | 28    | 0      | 0:35.47                  |
| 409 | TRUE   | 28     | 28    | 0      | 0:35.65                  |
| 410 | TRUE   | 28     | 28    | 0      | 0:35.61                  |
| 411 | TRUE   | 28     | 28    | 0      | 0:35.73                  |
| 412 | TRUE   | 28     | 28    | 0      | 0:35.56                  |

| <b>Id</b> | <b>Result</b> | <b>#total</b> | <b>#true</b> | <b>#false</b> | <b>Execution time (min:sec)</b> |
|-----------|---------------|---------------|--------------|---------------|---------------------------------|
| 413       | TRUE          | 28            | 28           | 0             | 0:35.64                         |
| 414       | TRUE          | 28            | 28           | 0             | 0:35.50                         |
| 415       | TRUE          | 28            | 28           | 0             | 0:35.63                         |
| 416       | TRUE          | 28            | 28           | 0             | 0:35.69                         |
| 417       | TRUE          | 28            | 28           | 0             | 0:35.75                         |
| 418       | TRUE          | 28            | 28           | 0             | 0:35.55                         |
| 419       | TRUE          | 28            | 28           | 0             | 0:35.56                         |
| 420       | TRUE          | 28            | 28           | 0             | 0:35.35                         |
| 421       | TRUE          | 28            | 28           | 0             | 0:35.58                         |
| 422       | TRUE          | 28            | 28           | 0             | 0:35.84                         |
| 423       | TRUE          | 28            | 28           | 0             | 0:35.57                         |
| 424       | TRUE          | 28            | 28           | 0             | 0:35.64                         |
| 425       | TRUE          | 28            | 28           | 0             | 0:35.57                         |
| 426       | TRUE          | 28            | 28           | 0             | 0:35.67                         |
| 427       | TRUE          | 28            | 28           | 0             | 0:35.50                         |
| 428       | TRUE          | 28            | 28           | 0             | 0:35.51                         |
| 429       | TRUE          | 28            | 28           | 0             | 0:35.54                         |
| 430       | TRUE          | 28            | 28           | 0             | 0:35.54                         |
| 431       | TRUE          | 28            | 28           | 0             | 0:35.54                         |
| 432       | TRUE          | 28            | 28           | 0             | 0:35.35                         |
| 433       | TRUE          | 28            | 28           | 0             | 0:35.61                         |
| 434       | TRUE          | 28            | 28           | 0             | 0:35.63                         |
| 435       | TRUE          | 28            | 28           | 0             | 0:35.48                         |
| 436       | TRUE          | 28            | 28           | 0             | 0:35.52                         |
| 437       | TRUE          | 28            | 28           | 0             | 0:35.48                         |
| 438       | TRUE          | 28            | 28           | 0             | 0:35.69                         |
| 439       | TRUE          | 28            | 28           | 0             | 0:35.63                         |
| 440       | TRUE          | 28            | 28           | 0             | 0:35.52                         |
| 441       | TRUE          | 28            | 28           | 0             | 0:35.59                         |
| 442       | TRUE          | 28            | 28           | 0             | 0:35.52                         |
| 443       | TRUE          | 28            | 28           | 0             | 0:35.60                         |
| 444       | TRUE          | 28            | 28           | 0             | 0:35.64                         |
| 445       | TRUE          | 28            | 28           | 0             | 0:35.57                         |
| 446       | TRUE          | 28            | 28           | 0             | 0:35.73                         |
| 447       | TRUE          | 28            | 28           | 0             | 0:35.66                         |
| 448       | TRUE          | 28            | 28           | 0             | 0:35.53                         |
| 449       | TRUE          | 28            | 28           | 0             | 0:35.60                         |
| 450       | TRUE          | 28            | 28           | 0             | 0:35.64                         |
| 451       | TRUE          | 28            | 28           | 0             | 0:35.44                         |
| 452       | TRUE          | 28            | 28           | 0             | 0:35.44                         |
| 453       | TRUE          | 28            | 28           | 0             | 0:35.48                         |
| 454       | TRUE          | 28            | 28           | 0             | 0:35.56                         |
| 455       | TRUE          | 28            | 28           | 0             | 0:35.53                         |
| 456       | TRUE          | 28            | 28           | 0             | 0:35.76                         |
| 457       | TRUE          | 28            | 28           | 0             | 0:35.52                         |
| 458       | TRUE          | 28            | 28           | 0             | 0:35.59                         |
| 459       | TRUE          | 28            | 28           | 0             | 0:35.54                         |
| 460       | TRUE          | 28            | 28           | 0             | 0:35.55                         |

| <b>Id</b> | <b>Result</b> | <b>#total</b> | <b>#true</b> | <b>#false</b> | <b>Execution time (min:sec)</b> |
|-----------|---------------|---------------|--------------|---------------|---------------------------------|
| 461       | TRUE          | 28            | 28           | 0             | 0:35.56                         |
| 462       | TRUE          | 28            | 28           | 0             | 0:35.44                         |
| 463       | TRUE          | 28            | 28           | 0             | 0:35.49                         |
| 464       | TRUE          | 28            | 28           | 0             | 0:35.51                         |
| 465       | TRUE          | 28            | 28           | 0             | 0:35.54                         |
| 466       | TRUE          | 28            | 28           | 0             | 0:35.48                         |
| 467       | TRUE          | 28            | 28           | 0             | 0:35.68                         |
| 468       | TRUE          | 28            | 28           | 0             | 0:35.29                         |
| 469       | TRUE          | 28            | 28           | 0             | 0:35.51                         |
| 470       | TRUE          | 28            | 28           | 0             | 0:35.74                         |
| 471       | TRUE          | 28            | 28           | 0             | 0:35.46                         |
| 472       | TRUE          | 28            | 28           | 0             | 0:35.56                         |
| 473       | TRUE          | 28            | 28           | 0             | 0:35.46                         |
| 474       | TRUE          | 28            | 28           | 0             | 0:35.54                         |
| 475       | TRUE          | 28            | 28           | 0             | 0:35.56                         |
| 476       | TRUE          | 28            | 28           | 0             | 0:35.58                         |
| 477       | TRUE          | 28            | 28           | 0             | 0:35.66                         |
| 478       | TRUE          | 28            | 28           | 0             | 0:35.43                         |
| 479       | TRUE          | 28            | 28           | 0             | 0:35.45                         |
| 480       | TRUE          | 28            | 28           | 0             | 0:35.55                         |
| 481       | TRUE          | 28            | 28           | 0             | 0:35.46                         |
| 482       | TRUE          | 28            | 28           | 0             | 0:35.45                         |
| 483       | TRUE          | 28            | 28           | 0             | 0:35.38                         |
| 484       | TRUE          | 28            | 28           | 0             | 0:35.49                         |
| 485       | TRUE          | 28            | 28           | 0             | 0:35.61                         |
| 486       | TRUE          | 28            | 28           | 0             | 0:35.34                         |
| 487       | TRUE          | 28            | 28           | 0             | 0:35.47                         |
| 488       | TRUE          | 28            | 28           | 0             | 0:35.54                         |
| 489       | TRUE          | 28            | 28           | 0             | 0:35.68                         |
| 490       | TRUE          | 28            | 28           | 0             | 0:35.60                         |
| 491       | TRUE          | 28            | 28           | 0             | 0:35.64                         |
| 492       | TRUE          | 28            | 28           | 0             | 0:35.44                         |
| 493       | TRUE          | 28            | 28           | 0             | 0:35.59                         |
| 494       | TRUE          | 28            | 28           | 0             | 0:35.92                         |
| 495       | TRUE          | 28            | 28           | 0             | 0:35.87                         |
| 496       | TRUE          | 28            | 28           | 0             | 0:35.49                         |
| 497       | TRUE          | 28            | 28           | 0             | 0:35.54                         |
| 498       | TRUE          | 28            | 28           | 0             | 0:35.50                         |
| 499       | TRUE          | 28            | 28           | 0             | 0:35.43                         |
| 500       | TRUE          | 28            | 28           | 0             | 0:35.49                         |

Table 3: Model checking results corresponding to PBLMSTL statement 9

| <b>Id</b> | <b>Result</b> | <b>#total</b> | <b>#true</b> | <b>#false</b> | <b>Execution time (min:sec)</b> |
|-----------|---------------|---------------|--------------|---------------|---------------------------------|
| 1         | TRUE          | 28            | 28           | 0             | 0:35.32                         |



| Id | Result | #total | #true | #false | Execution time (min:sec) |
|----|--------|--------|-------|--------|--------------------------|
| 2  | TRUE   | 28     | 28    | 0      | 0:35.39                  |
| 3  | TRUE   | 28     | 28    | 0      | 0:35.51                  |
| 4  | TRUE   | 28     | 28    | 0      | 0:35.53                  |
| 5  | TRUE   | 28     | 28    | 0      | 0:35.55                  |
| 6  | TRUE   | 28     | 28    | 0      | 0:35.75                  |
| 7  | TRUE   | 28     | 28    | 0      | 0:35.31                  |
| 8  | TRUE   | 28     | 28    | 0      | 0:35.48                  |
| 9  | TRUE   | 28     | 28    | 0      | 0:35.62                  |
| 10 | TRUE   | 28     | 28    | 0      | 0:35.51                  |
| 11 | TRUE   | 28     | 28    | 0      | 0:35.50                  |
| 12 | TRUE   | 28     | 28    | 0      | 0:35.44                  |
| 13 | TRUE   | 28     | 28    | 0      | 0:35.31                  |
| 14 | TRUE   | 28     | 28    | 0      | 0:35.50                  |
| 15 | TRUE   | 28     | 28    | 0      | 0:35.46                  |
| 16 | TRUE   | 28     | 28    | 0      | 0:35.54                  |
| 17 | TRUE   | 28     | 28    | 0      | 0:35.48                  |
| 18 | TRUE   | 28     | 28    | 0      | 0:35.38                  |
| 19 | TRUE   | 28     | 28    | 0      | 0:35.59                  |
| 20 | TRUE   | 28     | 28    | 0      | 0:35.57                  |
| 21 | TRUE   | 28     | 28    | 0      | 0:35.50                  |
| 22 | TRUE   | 28     | 28    | 0      | 0:35.78                  |
| 23 | TRUE   | 28     | 28    | 0      | 0:36.28                  |
| 24 | TRUE   | 28     | 28    | 0      | 0:35.63                  |
| 25 | TRUE   | 28     | 28    | 0      | 0:36.07                  |
| 26 | TRUE   | 28     | 28    | 0      | 0:35.59                  |
| 27 | TRUE   | 28     | 28    | 0      | 0:35.50                  |
| 28 | TRUE   | 28     | 28    | 0      | 0:35.64                  |
| 29 | TRUE   | 28     | 28    | 0      | 0:35.53                  |
| 30 | TRUE   | 28     | 28    | 0      | 0:35.38                  |
| 31 | TRUE   | 28     | 28    | 0      | 0:35.41                  |
| 32 | TRUE   | 28     | 28    | 0      | 0:35.35                  |
| 33 | TRUE   | 28     | 28    | 0      | 0:35.89                  |
| 34 | TRUE   | 28     | 28    | 0      | 0:35.53                  |
| 35 | TRUE   | 28     | 28    | 0      | 0:35.79                  |
| 36 | TRUE   | 28     | 28    | 0      | 0:35.39                  |
| 37 | TRUE   | 28     | 28    | 0      | 0:35.48                  |
| 38 | TRUE   | 28     | 28    | 0      | 0:35.64                  |
| 39 | TRUE   | 28     | 28    | 0      | 0:35.46                  |
| 40 | TRUE   | 28     | 28    | 0      | 0:35.48                  |
| 41 | TRUE   | 28     | 28    | 0      | 0:35.49                  |
| 42 | TRUE   | 28     | 28    | 0      | 0:35.50                  |
| 43 | TRUE   | 28     | 28    | 0      | 0:35.65                  |
| 44 | TRUE   | 28     | 28    | 0      | 0:35.50                  |
| 45 | TRUE   | 28     | 28    | 0      | 0:35.47                  |
| 46 | TRUE   | 28     | 28    | 0      | 0:35.36                  |
| 47 | TRUE   | 28     | 28    | 0      | 0:35.46                  |
| 48 | TRUE   | 28     | 28    | 0      | 0:35.43                  |
| 49 | TRUE   | 28     | 28    | 0      | 0:35.63                  |

| Id | Result | #total | #true | #false | Execution time (min:sec) |
|----|--------|--------|-------|--------|--------------------------|
| 50 | TRUE   | 28     | 28    | 0      | 0:35.44                  |
| 51 | TRUE   | 28     | 28    | 0      | 0:35.55                  |
| 52 | TRUE   | 28     | 28    | 0      | 0:35.39                  |
| 53 | TRUE   | 28     | 28    | 0      | 0:35.42                  |
| 54 | TRUE   | 28     | 28    | 0      | 0:35.40                  |
| 55 | TRUE   | 28     | 28    | 0      | 0:35.55                  |
| 56 | TRUE   | 28     | 28    | 0      | 0:35.44                  |
| 57 | TRUE   | 28     | 28    | 0      | 0:35.41                  |
| 58 | TRUE   | 28     | 28    | 0      | 0:35.46                  |
| 59 | TRUE   | 28     | 28    | 0      | 0:35.50                  |
| 60 | TRUE   | 28     | 28    | 0      | 0:35.53                  |
| 61 | TRUE   | 28     | 28    | 0      | 0:35.51                  |
| 62 | TRUE   | 28     | 28    | 0      | 0:35.29                  |
| 63 | TRUE   | 28     | 28    | 0      | 0:35.32                  |
| 64 | TRUE   | 28     | 28    | 0      | 0:35.53                  |
| 65 | TRUE   | 28     | 28    | 0      | 0:35.44                  |
| 66 | TRUE   | 28     | 28    | 0      | 0:35.42                  |
| 67 | TRUE   | 28     | 28    | 0      | 0:35.36                  |
| 68 | TRUE   | 28     | 28    | 0      | 0:35.40                  |
| 69 | TRUE   | 28     | 28    | 0      | 0:35.46                  |
| 70 | TRUE   | 28     | 28    | 0      | 0:35.47                  |
| 71 | TRUE   | 28     | 28    | 0      | 0:35.44                  |
| 72 | TRUE   | 28     | 28    | 0      | 0:35.45                  |
| 73 | TRUE   | 28     | 28    | 0      | 0:35.52                  |
| 74 | TRUE   | 28     | 28    | 0      | 0:35.55                  |
| 75 | TRUE   | 28     | 28    | 0      | 0:35.33                  |
| 76 | TRUE   | 28     | 28    | 0      | 0:35.46                  |
| 77 | TRUE   | 28     | 28    | 0      | 0:35.25                  |
| 78 | TRUE   | 28     | 28    | 0      | 0:35.63                  |
| 79 | TRUE   | 28     | 28    | 0      | 0:35.21                  |
| 80 | TRUE   | 28     | 28    | 0      | 0:35.49                  |
| 81 | TRUE   | 28     | 28    | 0      | 0:35.20                  |
| 82 | TRUE   | 28     | 28    | 0      | 0:36.01                  |
| 83 | TRUE   | 28     | 28    | 0      | 0:35.60                  |
| 84 | TRUE   | 28     | 28    | 0      | 0:35.45                  |
| 85 | TRUE   | 28     | 28    | 0      | 0:35.55                  |
| 86 | TRUE   | 28     | 28    | 0      | 0:35.48                  |
| 87 | TRUE   | 28     | 28    | 0      | 0:35.43                  |
| 88 | TRUE   | 28     | 28    | 0      | 0:35.51                  |
| 89 | TRUE   | 28     | 28    | 0      | 0:35.81                  |
| 90 | TRUE   | 28     | 28    | 0      | 0:35.64                  |
| 91 | TRUE   | 28     | 28    | 0      | 0:35.49                  |
| 92 | TRUE   | 28     | 28    | 0      | 0:35.64                  |
| 93 | TRUE   | 28     | 28    | 0      | 0:35.63                  |
| 94 | TRUE   | 28     | 28    | 0      | 0:35.46                  |
| 95 | TRUE   | 28     | 28    | 0      | 0:35.47                  |
| 96 | TRUE   | 28     | 28    | 0      | 0:35.19                  |
| 97 | TRUE   | 28     | 28    | 0      | 0:35.24                  |

| Id  | Result | #total | #true | #false | Execution time (min:sec) |
|-----|--------|--------|-------|--------|--------------------------|
| 98  | TRUE   | 28     | 28    | 0      | 0:36.01                  |
| 99  | TRUE   | 28     | 28    | 0      | 0:36.60                  |
| 100 | TRUE   | 28     | 28    | 0      | 0:36.97                  |
| 101 | TRUE   | 28     | 28    | 0      | 0:40.44                  |
| 102 | TRUE   | 28     | 28    | 0      | 0:39.23                  |
| 103 | TRUE   | 28     | 28    | 0      | 0:37.37                  |
| 104 | TRUE   | 28     | 28    | 0      | 0:36.57                  |
| 105 | TRUE   | 28     | 28    | 0      | 0:36.55                  |
| 106 | TRUE   | 28     | 28    | 0      | 0:36.59                  |
| 107 | TRUE   | 28     | 28    | 0      | 0:36.34                  |
| 108 | TRUE   | 28     | 28    | 0      | 0:36.58                  |
| 109 | TRUE   | 28     | 28    | 0      | 0:36.48                  |
| 110 | TRUE   | 28     | 28    | 0      | 0:36.72                  |
| 111 | TRUE   | 28     | 28    | 0      | 0:36.40                  |
| 112 | TRUE   | 28     | 28    | 0      | 0:36.83                  |
| 113 | TRUE   | 28     | 28    | 0      | 0:36.33                  |
| 114 | TRUE   | 28     | 28    | 0      | 0:36.27                  |
| 115 | TRUE   | 28     | 28    | 0      | 0:36.40                  |
| 116 | TRUE   | 28     | 28    | 0      | 0:36.42                  |
| 117 | TRUE   | 28     | 28    | 0      | 0:36.26                  |
| 118 | TRUE   | 28     | 28    | 0      | 0:36.76                  |
| 119 | TRUE   | 28     | 28    | 0      | 0:36.46                  |
| 120 | TRUE   | 28     | 28    | 0      | 0:36.36                  |
| 121 | TRUE   | 28     | 28    | 0      | 0:36.48                  |
| 122 | TRUE   | 28     | 28    | 0      | 0:36.37                  |
| 123 | TRUE   | 28     | 28    | 0      | 0:36.51                  |
| 124 | TRUE   | 28     | 28    | 0      | 0:36.45                  |
| 125 | TRUE   | 28     | 28    | 0      | 0:36.61                  |
| 126 | TRUE   | 28     | 28    | 0      | 0:36.27                  |
| 127 | TRUE   | 28     | 28    | 0      | 0:36.46                  |
| 128 | TRUE   | 28     | 28    | 0      | 0:36.31                  |
| 129 | TRUE   | 28     | 28    | 0      | 0:36.27                  |
| 130 | TRUE   | 28     | 28    | 0      | 0:36.26                  |
| 131 | TRUE   | 28     | 28    | 0      | 0:36.39                  |
| 132 | TRUE   | 28     | 28    | 0      | 0:36.24                  |
| 133 | TRUE   | 28     | 28    | 0      | 0:36.31                  |
| 134 | TRUE   | 28     | 28    | 0      | 0:36.20                  |
| 135 | TRUE   | 28     | 28    | 0      | 0:36.28                  |
| 136 | TRUE   | 28     | 28    | 0      | 0:36.48                  |
| 137 | TRUE   | 28     | 28    | 0      | 0:36.21                  |
| 138 | TRUE   | 28     | 28    | 0      | 0:36.49                  |
| 139 | TRUE   | 28     | 28    | 0      | 0:36.28                  |
| 140 | TRUE   | 28     | 28    | 0      | 0:36.41                  |
| 141 | TRUE   | 28     | 28    | 0      | 0:36.33                  |
| 142 | TRUE   | 28     | 28    | 0      | 0:36.46                  |
| 143 | TRUE   | 28     | 28    | 0      | 0:36.29                  |
| 144 | TRUE   | 28     | 28    | 0      | 0:36.32                  |
| 145 | TRUE   | 28     | 28    | 0      | 0:36.26                  |

| Id  | Result | #total | #true | #false | Execution time (min:sec) |
|-----|--------|--------|-------|--------|--------------------------|
| 146 | TRUE   | 28     | 28    | 0      | 0:36.29                  |
| 147 | TRUE   | 28     | 28    | 0      | 0:36.19                  |
| 148 | TRUE   | 28     | 28    | 0      | 0:36.28                  |
| 149 | TRUE   | 28     | 28    | 0      | 0:36.33                  |
| 150 | TRUE   | 28     | 28    | 0      | 0:39.04                  |
| 151 | TRUE   | 28     | 28    | 0      | 0:39.25                  |
| 152 | TRUE   | 28     | 28    | 0      | 0:37.53                  |
| 153 | TRUE   | 28     | 28    | 0      | 0:38.76                  |
| 154 | TRUE   | 28     | 28    | 0      | 0:38.40                  |
| 155 | TRUE   | 28     | 28    | 0      | 0:38.39                  |
| 156 | TRUE   | 28     | 28    | 0      | 0:38.55                  |
| 157 | TRUE   | 28     | 28    | 0      | 0:38.31                  |
| 158 | TRUE   | 28     | 28    | 0      | 0:38.14                  |
| 159 | TRUE   | 28     | 28    | 0      | 0:38.97                  |
| 160 | TRUE   | 28     | 28    | 0      | 0:38.40                  |
| 161 | TRUE   | 28     | 28    | 0      | 0:38.82                  |
| 162 | TRUE   | 28     | 28    | 0      | 0:38.57                  |
| 163 | TRUE   | 28     | 28    | 0      | 0:38.98                  |
| 164 | TRUE   | 28     | 28    | 0      | 0:39.34                  |
| 165 | TRUE   | 28     | 28    | 0      | 0:39.03                  |
| 166 | TRUE   | 28     | 28    | 0      | 0:39.14                  |
| 167 | TRUE   | 28     | 28    | 0      | 0:38.83                  |
| 168 | TRUE   | 28     | 28    | 0      | 0:38.66                  |
| 169 | TRUE   | 28     | 28    | 0      | 0:39.10                  |
| 170 | TRUE   | 28     | 28    | 0      | 0:39.04                  |
| 171 | TRUE   | 28     | 28    | 0      | 0:38.60                  |
| 172 | TRUE   | 28     | 28    | 0      | 0:38.56                  |
| 173 | TRUE   | 28     | 28    | 0      | 0:38.52                  |
| 174 | TRUE   | 28     | 28    | 0      | 0:38.85                  |
| 175 | TRUE   | 28     | 28    | 0      | 0:38.70                  |
| 176 | TRUE   | 28     | 28    | 0      | 0:39.28                  |
| 177 | TRUE   | 28     | 28    | 0      | 0:39.13                  |
| 178 | TRUE   | 28     | 28    | 0      | 0:39.06                  |
| 179 | TRUE   | 28     | 28    | 0      | 0:38.72                  |
| 180 | TRUE   | 28     | 28    | 0      | 0:39.48                  |
| 181 | TRUE   | 28     | 28    | 0      | 0:38.89                  |
| 182 | TRUE   | 28     | 28    | 0      | 0:39.25                  |
| 183 | TRUE   | 28     | 28    | 0      | 0:40.03                  |
| 184 | TRUE   | 28     | 28    | 0      | 0:39.56                  |
| 185 | TRUE   | 28     | 28    | 0      | 0:39.00                  |
| 186 | TRUE   | 28     | 28    | 0      | 0:39.07                  |
| 187 | TRUE   | 28     | 28    | 0      | 0:38.54                  |
| 188 | TRUE   | 28     | 28    | 0      | 0:38.97                  |
| 189 | TRUE   | 28     | 28    | 0      | 0:39.52                  |
| 190 | TRUE   | 28     | 28    | 0      | 0:38.63                  |
| 191 | TRUE   | 28     | 28    | 0      | 0:38.41                  |
| 192 | TRUE   | 28     | 28    | 0      | 0:39.20                  |
| 193 | TRUE   | 28     | 28    | 0      | 0:38.97                  |

| <b>Id</b> | <b>Result</b> | <b>#total</b> | <b>#true</b> | <b>#false</b> | <b>Execution time (min:sec)</b> |
|-----------|---------------|---------------|--------------|---------------|---------------------------------|
| 194       | TRUE          | 28            | 28           | 0             | 0:39.06                         |
| 195       | TRUE          | 28            | 28           | 0             | 0:38.50                         |
| 196       | TRUE          | 28            | 28           | 0             | 0:38.69                         |
| 197       | TRUE          | 28            | 28           | 0             | 0:39.26                         |
| 198       | TRUE          | 28            | 28           | 0             | 0:38.76                         |
| 199       | TRUE          | 28            | 28           | 0             | 0:38.57                         |
| 200       | TRUE          | 28            | 28           | 0             | 0:38.88                         |
| 201       | TRUE          | 28            | 28           | 0             | 0:38.54                         |
| 202       | TRUE          | 28            | 28           | 0             | 0:38.47                         |
| 203       | TRUE          | 28            | 28           | 0             | 0:38.72                         |
| 204       | TRUE          | 28            | 28           | 0             | 0:41.09                         |
| 205       | TRUE          | 28            | 28           | 0             | 0:38.92                         |
| 206       | TRUE          | 28            | 28           | 0             | 0:38.69                         |
| 207       | TRUE          | 28            | 28           | 0             | 0:38.65                         |
| 208       | TRUE          | 28            | 28           | 0             | 0:38.81                         |
| 209       | TRUE          | 28            | 28           | 0             | 0:39.07                         |
| 210       | TRUE          | 28            | 28           | 0             | 0:39.02                         |
| 211       | TRUE          | 28            | 28           | 0             | 0:39.19                         |
| 212       | TRUE          | 28            | 28           | 0             | 0:40.03                         |
| 213       | TRUE          | 28            | 28           | 0             | 0:39.29                         |
| 214       | TRUE          | 28            | 28           | 0             | 0:39.02                         |
| 215       | TRUE          | 28            | 28           | 0             | 0:38.83                         |
| 216       | TRUE          | 28            | 28           | 0             | 0:38.57                         |
| 217       | TRUE          | 28            | 28           | 0             | 0:39.04                         |
| 218       | TRUE          | 28            | 28           | 0             | 0:38.89                         |
| 219       | TRUE          | 28            | 28           | 0             | 0:38.86                         |
| 220       | TRUE          | 28            | 28           | 0             | 0:38.74                         |
| 221       | TRUE          | 28            | 28           | 0             | 0:39.04                         |
| 222       | TRUE          | 28            | 28           | 0             | 0:39.03                         |
| 223       | TRUE          | 28            | 28           | 0             | 0:38.89                         |
| 224       | TRUE          | 28            | 28           | 0             | 0:38.93                         |
| 225       | TRUE          | 28            | 28           | 0             | 0:38.89                         |
| 226       | TRUE          | 28            | 28           | 0             | 0:39.13                         |
| 227       | TRUE          | 28            | 28           | 0             | 0:38.92                         |
| 228       | TRUE          | 28            | 28           | 0             | 0:38.45                         |
| 229       | TRUE          | 28            | 28           | 0             | 0:39.10                         |
| 230       | TRUE          | 28            | 28           | 0             | 0:39.61                         |
| 231       | TRUE          | 28            | 28           | 0             | 0:39.00                         |
| 232       | TRUE          | 28            | 28           | 0             | 0:38.53                         |
| 233       | TRUE          | 28            | 28           | 0             | 0:38.18                         |
| 234       | TRUE          | 28            | 28           | 0             | 0:39.03                         |
| 235       | TRUE          | 28            | 28           | 0             | 0:39.54                         |
| 236       | TRUE          | 28            | 28           | 0             | 0:39.21                         |
| 237       | TRUE          | 28            | 28           | 0             | 0:38.63                         |
| 238       | TRUE          | 28            | 28           | 0             | 0:39.42                         |
| 239       | TRUE          | 28            | 28           | 0             | 0:38.94                         |
| 240       | TRUE          | 28            | 28           | 0             | 0:39.06                         |
| 241       | TRUE          | 28            | 28           | 0             | 0:38.97                         |

| <b>Id</b> | <b>Result</b> | <b>#total</b> | <b>#true</b> | <b>#false</b> | <b>Execution time (min:sec)</b> |
|-----------|---------------|---------------|--------------|---------------|---------------------------------|
| 242       | TRUE          | 28            | 28           | 0             | 0:39.21                         |
| 243       | TRUE          | 28            | 28           | 0             | 0:38.86                         |
| 244       | TRUE          | 28            | 28           | 0             | 0:39.37                         |
| 245       | TRUE          | 28            | 28           | 0             | 0:39.28                         |
| 246       | TRUE          | 28            | 28           | 0             | 0:38.91                         |
| 247       | TRUE          | 28            | 28           | 0             | 0:39.26                         |
| 248       | TRUE          | 28            | 28           | 0             | 0:39.11                         |
| 249       | TRUE          | 28            | 28           | 0             | 0:39.13                         |
| 250       | TRUE          | 28            | 28           | 0             | 0:38.44                         |
| 251       | TRUE          | 28            | 28           | 0             | 0:38.52                         |
| 252       | TRUE          | 28            | 28           | 0             | 0:39.13                         |
| 253       | TRUE          | 28            | 28           | 0             | 0:39.10                         |
| 254       | TRUE          | 28            | 28           | 0             | 0:38.91                         |
| 255       | TRUE          | 28            | 28           | 0             | 0:38.72                         |
| 256       | TRUE          | 28            | 28           | 0             | 0:39.04                         |
| 257       | TRUE          | 28            | 28           | 0             | 0:39.07                         |
| 258       | TRUE          | 28            | 28           | 0             | 0:38.62                         |
| 259       | TRUE          | 28            | 28           | 0             | 0:38.86                         |
| 260       | TRUE          | 28            | 28           | 0             | 0:39.47                         |
| 261       | TRUE          | 28            | 28           | 0             | 0:39.49                         |
| 262       | TRUE          | 28            | 28           | 0             | 0:39.12                         |
| 263       | TRUE          | 28            | 28           | 0             | 0:39.33                         |
| 264       | TRUE          | 28            | 28           | 0             | 0:38.81                         |
| 265       | TRUE          | 28            | 28           | 0             | 0:38.98                         |
| 266       | TRUE          | 28            | 28           | 0             | 0:39.02                         |
| 267       | TRUE          | 28            | 28           | 0             | 0:38.83                         |
| 268       | TRUE          | 28            | 28           | 0             | 0:39.08                         |
| 269       | TRUE          | 28            | 28           | 0             | 0:39.62                         |
| 270       | TRUE          | 28            | 28           | 0             | 0:39.04                         |
| 271       | TRUE          | 28            | 28           | 0             | 0:39.24                         |
| 272       | TRUE          | 28            | 28           | 0             | 0:39.10                         |
| 273       | TRUE          | 28            | 28           | 0             | 0:39.34                         |
| 274       | TRUE          | 28            | 28           | 0             | 0:39.24                         |
| 275       | TRUE          | 28            | 28           | 0             | 0:38.87                         |
| 276       | TRUE          | 28            | 28           | 0             | 0:38.74                         |
| 277       | TRUE          | 28            | 28           | 0             | 0:38.44                         |
| 278       | TRUE          | 28            | 28           | 0             | 0:39.01                         |
| 279       | TRUE          | 28            | 28           | 0             | 0:39.02                         |
| 280       | TRUE          | 28            | 28           | 0             | 0:39.48                         |
| 281       | TRUE          | 28            | 28           | 0             | 0:38.96                         |
| 282       | TRUE          | 28            | 28           | 0             | 0:38.78                         |
| 283       | TRUE          | 28            | 28           | 0             | 0:39.02                         |
| 284       | TRUE          | 28            | 28           | 0             | 0:38.97                         |
| 285       | TRUE          | 28            | 28           | 0             | 0:38.34                         |
| 286       | TRUE          | 28            | 28           | 0             | 0:39.22                         |
| 287       | TRUE          | 28            | 28           | 0             | 0:38.88                         |
| 288       | TRUE          | 28            | 28           | 0             | 0:38.81                         |
| 289       | TRUE          | 28            | 28           | 0             | 0:39.01                         |

| Id  | Result | #total | #true | #false | Execution time (min:sec) |
|-----|--------|--------|-------|--------|--------------------------|
| 290 | TRUE   | 28     | 28    | 0      | 0:38.99                  |
| 291 | TRUE   | 28     | 28    | 0      | 0:38.91                  |
| 292 | TRUE   | 28     | 28    | 0      | 0:39.44                  |
| 293 | TRUE   | 28     | 28    | 0      | 0:39.19                  |
| 294 | TRUE   | 28     | 28    | 0      | 0:39.29                  |
| 295 | TRUE   | 28     | 28    | 0      | 0:38.57                  |
| 296 | TRUE   | 28     | 28    | 0      | 0:38.57                  |
| 297 | TRUE   | 28     | 28    | 0      | 0:39.30                  |
| 298 | TRUE   | 28     | 28    | 0      | 0:39.37                  |
| 299 | TRUE   | 28     | 28    | 0      | 0:38.85                  |
| 300 | TRUE   | 28     | 28    | 0      | 0:38.94                  |
| 301 | TRUE   | 28     | 28    | 0      | 0:38.92                  |
| 302 | TRUE   | 28     | 28    | 0      | 0:39.06                  |
| 303 | TRUE   | 28     | 28    | 0      | 0:39.15                  |
| 304 | TRUE   | 28     | 28    | 0      | 0:39.20                  |
| 305 | TRUE   | 28     | 28    | 0      | 0:38.63                  |
| 306 | TRUE   | 28     | 28    | 0      | 0:38.75                  |
| 307 | TRUE   | 28     | 28    | 0      | 0:39.32                  |
| 308 | TRUE   | 28     | 28    | 0      | 0:38.62                  |
| 309 | TRUE   | 28     | 28    | 0      | 0:38.60                  |
| 310 | TRUE   | 28     | 28    | 0      | 0:39.00                  |
| 311 | TRUE   | 28     | 28    | 0      | 0:39.40                  |
| 312 | TRUE   | 28     | 28    | 0      | 0:39.47                  |
| 313 | TRUE   | 28     | 28    | 0      | 0:38.92                  |
| 314 | TRUE   | 28     | 28    | 0      | 0:38.49                  |
| 315 | TRUE   | 28     | 28    | 0      | 0:38.88                  |
| 316 | TRUE   | 28     | 28    | 0      | 0:39.40                  |
| 317 | TRUE   | 28     | 28    | 0      | 0:39.09                  |
| 318 | TRUE   | 28     | 28    | 0      | 0:38.72                  |
| 319 | TRUE   | 28     | 28    | 0      | 0:38.57                  |
| 320 | TRUE   | 28     | 28    | 0      | 0:39.15                  |
| 321 | TRUE   | 28     | 28    | 0      | 0:39.00                  |
| 322 | TRUE   | 28     | 28    | 0      | 0:38.76                  |
| 323 | TRUE   | 28     | 28    | 0      | 0:38.83                  |
| 324 | TRUE   | 28     | 28    | 0      | 0:39.23                  |
| 325 | TRUE   | 28     | 28    | 0      | 0:39.32                  |
| 326 | TRUE   | 28     | 28    | 0      | 0:39.17                  |
| 327 | TRUE   | 28     | 28    | 0      | 0:38.82                  |
| 328 | TRUE   | 28     | 28    | 0      | 0:43.61                  |
| 329 | TRUE   | 28     | 28    | 0      | 0:46.31                  |
| 330 | TRUE   | 28     | 28    | 0      | 0:37.62                  |
| 331 | TRUE   | 28     | 28    | 0      | 0:38.58                  |
| 332 | TRUE   | 28     | 28    | 0      | 0:42.60                  |
| 333 | TRUE   | 28     | 28    | 0      | 0:37.73                  |
| 334 | TRUE   | 28     | 28    | 0      | 0:35.48                  |
| 335 | TRUE   | 28     | 28    | 0      | 0:35.45                  |
| 336 | TRUE   | 28     | 28    | 0      | 0:36.21                  |
| 337 | TRUE   | 28     | 28    | 0      | 0:35.94                  |

| <b>Id</b> | <b>Result</b> | <b>#total</b> | <b>#true</b> | <b>#false</b> | <b>Execution time (min:sec)</b> |
|-----------|---------------|---------------|--------------|---------------|---------------------------------|
| 338       | TRUE          | 28            | 28           | 0             | 0:35.41                         |
| 339       | TRUE          | 28            | 28           | 0             | 0:35.85                         |
| 340       | TRUE          | 28            | 28           | 0             | 0:34.59                         |
| 341       | TRUE          | 28            | 28           | 0             | 0:34.55                         |
| 342       | TRUE          | 28            | 28           | 0             | 0:34.56                         |
| 343       | TRUE          | 28            | 28           | 0             | 0:34.60                         |
| 344       | TRUE          | 28            | 28           | 0             | 0:34.56                         |
| 345       | TRUE          | 28            | 28           | 0             | 0:34.57                         |
| 346       | TRUE          | 28            | 28           | 0             | 0:34.47                         |
| 347       | TRUE          | 28            | 28           | 0             | 0:34.46                         |
| 348       | TRUE          | 28            | 28           | 0             | 0:34.43                         |
| 349       | TRUE          | 28            | 28           | 0             | 0:34.43                         |
| 350       | TRUE          | 28            | 28           | 0             | 0:34.45                         |
| 351       | TRUE          | 28            | 28           | 0             | 0:34.63                         |
| 352       | TRUE          | 28            | 28           | 0             | 0:34.47                         |
| 353       | TRUE          | 28            | 28           | 0             | 0:34.43                         |
| 354       | TRUE          | 28            | 28           | 0             | 0:34.51                         |
| 355       | TRUE          | 28            | 28           | 0             | 0:34.57                         |
| 356       | TRUE          | 28            | 28           | 0             | 0:34.54                         |
| 357       | TRUE          | 28            | 28           | 0             | 0:34.31                         |
| 358       | TRUE          | 28            | 28           | 0             | 0:34.53                         |
| 359       | TRUE          | 28            | 28           | 0             | 0:34.82                         |
| 360       | TRUE          | 28            | 28           | 0             | 0:34.50                         |
| 361       | TRUE          | 28            | 28           | 0             | 0:34.44                         |
| 362       | TRUE          | 28            | 28           | 0             | 0:34.42                         |
| 363       | TRUE          | 28            | 28           | 0             | 0:34.46                         |
| 364       | TRUE          | 28            | 28           | 0             | 0:34.32                         |
| 365       | TRUE          | 28            | 28           | 0             | 0:34.42                         |
| 366       | TRUE          | 28            | 28           | 0             | 0:34.40                         |
| 367       | TRUE          | 28            | 28           | 0             | 0:34.43                         |
| 368       | TRUE          | 28            | 28           | 0             | 0:34.48                         |
| 369       | TRUE          | 28            | 28           | 0             | 0:34.39                         |
| 370       | TRUE          | 28            | 28           | 0             | 0:34.28                         |
| 371       | TRUE          | 28            | 28           | 0             | 0:34.62                         |
| 372       | TRUE          | 28            | 28           | 0             | 0:34.34                         |
| 373       | TRUE          | 28            | 28           | 0             | 0:34.33                         |
| 374       | TRUE          | 28            | 28           | 0             | 0:34.28                         |
| 375       | TRUE          | 28            | 28           | 0             | 0:34.46                         |
| 376       | TRUE          | 28            | 28           | 0             | 0:34.62                         |
| 377       | TRUE          | 28            | 28           | 0             | 0:34.40                         |
| 378       | TRUE          | 28            | 28           | 0             | 0:34.54                         |
| 379       | TRUE          | 28            | 28           | 0             | 0:34.41                         |
| 380       | TRUE          | 28            | 28           | 0             | 0:34.36                         |
| 381       | TRUE          | 28            | 28           | 0             | 0:34.35                         |
| 382       | TRUE          | 28            | 28           | 0             | 0:34.50                         |
| 383       | TRUE          | 28            | 28           | 0             | 0:34.48                         |
| 384       | TRUE          | 28            | 28           | 0             | 0:34.19                         |
| 385       | TRUE          | 28            | 28           | 0             | 0:34.49                         |



| Id  | Result | #total | #true | #false | Execution time (min:sec) |
|-----|--------|--------|-------|--------|--------------------------|
| 386 | TRUE   | 28     | 28    | 0      | 0:34.32                  |
| 387 | TRUE   | 28     | 28    | 0      | 0:34.35                  |
| 388 | TRUE   | 28     | 28    | 0      | 0:34.30                  |
| 389 | TRUE   | 28     | 28    | 0      | 0:34.40                  |
| 390 | TRUE   | 28     | 28    | 0      | 0:34.38                  |
| 391 | TRUE   | 28     | 28    | 0      | 0:34.27                  |
| 392 | TRUE   | 28     | 28    | 0      | 0:34.33                  |
| 393 | TRUE   | 28     | 28    | 0      | 0:34.17                  |
| 394 | TRUE   | 28     | 28    | 0      | 0:34.53                  |
| 395 | TRUE   | 28     | 28    | 0      | 0:34.27                  |
| 396 | TRUE   | 28     | 28    | 0      | 0:34.19                  |
| 397 | TRUE   | 28     | 28    | 0      | 0:34.61                  |
| 398 | TRUE   | 28     | 28    | 0      | 0:34.43                  |
| 399 | TRUE   | 28     | 28    | 0      | 0:34.20                  |
| 400 | TRUE   | 28     | 28    | 0      | 0:34.29                  |
| 401 | TRUE   | 28     | 28    | 0      | 0:34.30                  |
| 402 | TRUE   | 28     | 28    | 0      | 0:34.45                  |
| 403 | TRUE   | 28     | 28    | 0      | 0:34.36                  |
| 404 | TRUE   | 28     | 28    | 0      | 0:34.40                  |
| 405 | TRUE   | 28     | 28    | 0      | 0:34.40                  |
| 406 | TRUE   | 28     | 28    | 0      | 0:34.18                  |
| 407 | TRUE   | 28     | 28    | 0      | 0:34.30                  |
| 408 | TRUE   | 28     | 28    | 0      | 0:34.32                  |
| 409 | TRUE   | 28     | 28    | 0      | 0:34.38                  |
| 410 | TRUE   | 28     | 28    | 0      | 0:34.34                  |
| 411 | TRUE   | 28     | 28    | 0      | 0:34.29                  |
| 412 | TRUE   | 28     | 28    | 0      | 0:34.19                  |
| 413 | TRUE   | 28     | 28    | 0      | 0:34.34                  |
| 414 | TRUE   | 28     | 28    | 0      | 0:34.23                  |
| 415 | TRUE   | 28     | 28    | 0      | 0:34.17                  |
| 416 | TRUE   | 28     | 28    | 0      | 0:34.25                  |
| 417 | TRUE   | 28     | 28    | 0      | 0:34.23                  |
| 418 | TRUE   | 28     | 28    | 0      | 0:34.45                  |
| 419 | TRUE   | 28     | 28    | 0      | 0:34.21                  |
| 420 | TRUE   | 28     | 28    | 0      | 0:34.39                  |
| 421 | TRUE   | 28     | 28    | 0      | 0:34.32                  |
| 422 | TRUE   | 28     | 28    | 0      | 0:34.16                  |
| 423 | TRUE   | 28     | 28    | 0      | 0:34.51                  |
| 424 | TRUE   | 28     | 28    | 0      | 0:34.24                  |
| 425 | TRUE   | 28     | 28    | 0      | 0:34.35                  |
| 426 | TRUE   | 28     | 28    | 0      | 0:34.30                  |
| 427 | TRUE   | 28     | 28    | 0      | 0:34.32                  |
| 428 | TRUE   | 28     | 28    | 0      | 0:34.32                  |
| 429 | TRUE   | 28     | 28    | 0      | 0:34.26                  |
| 430 | TRUE   | 28     | 28    | 0      | 0:34.32                  |
| 431 | TRUE   | 28     | 28    | 0      | 0:34.46                  |
| 432 | TRUE   | 28     | 28    | 0      | 0:34.40                  |
| 433 | TRUE   | 28     | 28    | 0      | 0:34.65                  |

| <b>Id</b> | <b>Result</b> | <b>#total</b> | <b>#true</b> | <b>#false</b> | <b>Execution time (min:sec)</b> |
|-----------|---------------|---------------|--------------|---------------|---------------------------------|
| 434       | TRUE          | 28            | 28           | 0             | 0:34.52                         |
| 435       | TRUE          | 28            | 28           | 0             | 0:34.42                         |
| 436       | TRUE          | 28            | 28           | 0             | 0:34.45                         |
| 437       | TRUE          | 28            | 28           | 0             | 0:34.52                         |
| 438       | TRUE          | 28            | 28           | 0             | 0:34.60                         |
| 439       | TRUE          | 28            | 28           | 0             | 0:34.71                         |
| 440       | TRUE          | 28            | 28           | 0             | 0:34.59                         |
| 441       | TRUE          | 28            | 28           | 0             | 0:34.45                         |
| 442       | TRUE          | 28            | 28           | 0             | 0:34.31                         |
| 443       | TRUE          | 28            | 28           | 0             | 0:34.36                         |
| 444       | TRUE          | 28            | 28           | 0             | 0:34.29                         |
| 445       | TRUE          | 28            | 28           | 0             | 0:34.41                         |
| 446       | TRUE          | 28            | 28           | 0             | 0:34.42                         |
| 447       | TRUE          | 28            | 28           | 0             | 0:34.18                         |
| 448       | TRUE          | 28            | 28           | 0             | 0:34.49                         |
| 449       | TRUE          | 28            | 28           | 0             | 0:34.50                         |
| 450       | TRUE          | 28            | 28           | 0             | 0:34.28                         |
| 451       | TRUE          | 28            | 28           | 0             | 0:34.30                         |
| 452       | TRUE          | 28            | 28           | 0             | 0:34.14                         |
| 453       | TRUE          | 28            | 28           | 0             | 0:34.20                         |
| 454       | TRUE          | 28            | 28           | 0             | 0:34.30                         |
| 455       | TRUE          | 28            | 28           | 0             | 0:34.23                         |
| 456       | TRUE          | 28            | 28           | 0             | 0:34.23                         |
| 457       | TRUE          | 28            | 28           | 0             | 0:34.28                         |
| 458       | TRUE          | 28            | 28           | 0             | 0:34.24                         |
| 459       | TRUE          | 28            | 28           | 0             | 0:34.22                         |
| 460       | TRUE          | 28            | 28           | 0             | 0:34.30                         |
| 461       | TRUE          | 28            | 28           | 0             | 0:34.33                         |
| 462       | TRUE          | 28            | 28           | 0             | 0:34.16                         |
| 463       | TRUE          | 28            | 28           | 0             | 0:34.20                         |
| 464       | TRUE          | 28            | 28           | 0             | 0:34.40                         |
| 465       | TRUE          | 28            | 28           | 0             | 0:34.31                         |
| 466       | TRUE          | 28            | 28           | 0             | 0:34.54                         |
| 467       | TRUE          | 28            | 28           | 0             | 0:34.36                         |
| 468       | TRUE          | 28            | 28           | 0             | 0:34.34                         |
| 469       | TRUE          | 28            | 28           | 0             | 0:34.21                         |
| 470       | TRUE          | 28            | 28           | 0             | 0:34.59                         |
| 471       | TRUE          | 28            | 28           | 0             | 0:34.48                         |
| 472       | TRUE          | 28            | 28           | 0             | 0:34.40                         |
| 473       | TRUE          | 28            | 28           | 0             | 0:34.31                         |
| 474       | TRUE          | 28            | 28           | 0             | 0:34.20                         |
| 475       | TRUE          | 28            | 28           | 0             | 0:34.04                         |
| 476       | TRUE          | 28            | 28           | 0             | 0:34.42                         |
| 477       | TRUE          | 28            | 28           | 0             | 0:34.34                         |
| 478       | TRUE          | 28            | 28           | 0             | 0:34.10                         |
| 479       | TRUE          | 28            | 28           | 0             | 0:34.17                         |
| 480       | TRUE          | 28            | 28           | 0             | 0:34.22                         |
| 481       | TRUE          | 28            | 28           | 0             | 0:34.25                         |

---

| <b>Id</b> | <b>Result</b> | <b>#total</b> | <b>#true</b> | <b>#false</b> | <b>Execution time (min:sec)</b> |
|-----------|---------------|---------------|--------------|---------------|---------------------------------|
| 482       | TRUE          | 28            | 28           | 0             | 0:34.29                         |
| 483       | TRUE          | 28            | 28           | 0             | 0:34.50                         |
| 484       | TRUE          | 28            | 28           | 0             | 0:34.40                         |
| 485       | TRUE          | 28            | 28           | 0             | 0:34.21                         |
| 486       | TRUE          | 28            | 28           | 0             | 0:34.25                         |
| 487       | TRUE          | 28            | 28           | 0             | 0:34.22                         |
| 488       | TRUE          | 28            | 28           | 0             | 0:34.09                         |
| 489       | TRUE          | 28            | 28           | 0             | 0:34.25                         |
| 490       | TRUE          | 28            | 28           | 0             | 0:34.30                         |
| 491       | TRUE          | 28            | 28           | 0             | 0:34.30                         |
| 492       | TRUE          | 28            | 28           | 0             | 0:34.30                         |
| 493       | TRUE          | 28            | 28           | 0             | 0:34.11                         |
| 494       | TRUE          | 28            | 28           | 0             | 0:34.18                         |
| 495       | TRUE          | 28            | 28           | 0             | 0:34.26                         |
| 496       | TRUE          | 28            | 28           | 0             | 0:34.30                         |
| 497       | TRUE          | 28            | 28           | 0             | 0:34.25                         |
| 498       | TRUE          | 28            | 28           | 0             | 0:34.14                         |
| 499       | TRUE          | 28            | 28           | 0             | 0:34.14                         |
| 500       | TRUE          | 28            | 28           | 0             | 0:34.14                         |

---
