# Supplementary material for: A Novel Method to Verify Multilevel Computational Models of Biological Systems Using Multiscale Spatio-Temporal Meta Model Checking
Source: PubMed Central journal article supplement (PMC4871515; doi:10.1371/journal.pone.0154847), 2016-05-17
Supplement: pone.0154847.s009.pdf [file pone.0154847.s009.pdf]

## Model checking results for the acute inflammation of the gut and lung case study

For the convenience of the reader the set of PBLMSTL statements considered for the acute inflammation of the gut and lung case study will be restated below:

$$\begin{aligned}
 P > 0.9 [F [1, 999] ((d(\{LungOccludinCytoplasm\}( \\
 \text{scaleAndSubsystem} = Tissue.LungEpithelium)) \\
 < 0) \Rightarrow (F [1, 999] (d(\text{sum}(\text{area}(\text{filter}( \\
 \text{regions}, \text{scaleAndSubsystem} = \\
 \text{Cellular.LungEndotheliumIschemia)))) > 0)))] \quad (10)
 \end{aligned}$$

$$\begin{aligned}
 P > 0.9 [G [1, 999] ((d(\{GutCellDamageByproduct\}( \\
 \text{scaleAndSubsystem} = Tissue.GutEndothelium)) \\
 > 0) \Rightarrow (F [1, 999] ( \\
 d(\{LungCellDamageByproduct\}( \\
 \text{scaleAndSubsystem} = Tissue.LungEndothelium)) \\
 > 0)))] \quad (11)
 \end{aligned}$$

$$\begin{aligned}
 P > 0.9 [F [1, 999] ((d(\{GutOccludinCellwall\}( \\
 \text{scaleAndSubsystem} = Tissue.GutEpithelium)) \\
 < 0) \Rightarrow (F [1, 999] (d(\{GutLeak\}( \\
 \text{scaleAndSubsystem} = Organ.Gut)) > 0)))] \quad (12)
 \end{aligned}$$

Each table describes the results corresponding to one of the PBLMSTL statements. The first column of each row represents the identifier of the model checking execution. The second column represents the evaluation result (T = true, F = false) of the PBLMSTL statement for that particular model checker execution. The number of MSTML files against which the PBLMSTL statement was executed, respectively how many of them evaluated true and how many evaluated false is provided in columns three, four and five. Finally column six presents the execution time (minutes:seconds format) corresponding to each model checker run. All executions of the model checker employed the frequentist statistical model checking approach with probability of both type I and type II errors equal to 5%.

Table 1: Model checking results corresponding to PBLMSTL statement 10

| Id | Result | #total | #true | #false | Execution time (min:sec) |
|----|--------|--------|-------|--------|--------------------------|
| 1  | TRUE   | 28     | 28    | 0      | 1:28.57                  |

| Id | Result | #total | #true | #false | Execution time (min:sec) |
|----|--------|--------|-------|--------|--------------------------|
| 2  | TRUE   | 28     | 28    | 0      | 1:29.34                  |
| 3  | TRUE   | 28     | 28    | 0      | 1:29.24                  |
| 4  | TRUE   | 28     | 28    | 0      | 1:28.27                  |
| 5  | TRUE   | 28     | 28    | 0      | 1:27.55                  |
| 6  | TRUE   | 28     | 28    | 0      | 1:27.80                  |
| 7  | TRUE   | 28     | 28    | 0      | 1:27.65                  |
| 8  | TRUE   | 28     | 28    | 0      | 1:27.90                  |
| 9  | TRUE   | 28     | 28    | 0      | 1:27.15                  |
| 10 | TRUE   | 28     | 28    | 0      | 1:27.15                  |
| 11 | TRUE   | 28     | 28    | 0      | 1:27.35                  |
| 12 | TRUE   | 28     | 28    | 0      | 1:26.93                  |
| 13 | TRUE   | 28     | 28    | 0      | 1:30.61                  |
| 14 | TRUE   | 28     | 28    | 0      | 1:27.56                  |
| 15 | TRUE   | 28     | 28    | 0      | 1:27.65                  |
| 16 | TRUE   | 28     | 28    | 0      | 1:28.33                  |
| 17 | TRUE   | 28     | 28    | 0      | 1:28.25                  |
| 18 | TRUE   | 28     | 28    | 0      | 1:27.03                  |
| 19 | TRUE   | 28     | 28    | 0      | 1:27.64                  |
| 20 | TRUE   | 28     | 28    | 0      | 1:27.76                  |
| 21 | TRUE   | 28     | 28    | 0      | 1:28.15                  |
| 22 | TRUE   | 28     | 28    | 0      | 1:27.72                  |
| 23 | TRUE   | 28     | 28    | 0      | 1:28.09                  |
| 24 | TRUE   | 28     | 28    | 0      | 1:27.61                  |
| 25 | TRUE   | 28     | 28    | 0      | 1:26.90                  |
| 26 | TRUE   | 28     | 28    | 0      | 1:27.05                  |
| 27 | TRUE   | 28     | 28    | 0      | 1:28.01                  |
| 28 | TRUE   | 28     | 28    | 0      | 1:27.70                  |
| 29 | TRUE   | 28     | 28    | 0      | 1:27.31                  |
| 30 | TRUE   | 28     | 28    | 0      | 1:27.25                  |
| 31 | TRUE   | 28     | 28    | 0      | 1:27.54                  |
| 32 | TRUE   | 28     | 28    | 0      | 1:27.60                  |
| 33 | TRUE   | 28     | 28    | 0      | 1:27.37                  |
| 34 | TRUE   | 28     | 28    | 0      | 1:26.23                  |
| 35 | TRUE   | 28     | 28    | 0      | 1:27.33                  |
| 36 | TRUE   | 28     | 28    | 0      | 1:27.51                  |
| 37 | TRUE   | 28     | 28    | 0      | 1:28.34                  |
| 38 | TRUE   | 28     | 28    | 0      | 1:27.61                  |
| 39 | TRUE   | 28     | 28    | 0      | 1:27.22                  |
| 40 | TRUE   | 28     | 28    | 0      | 1:27.05                  |
| 41 | TRUE   | 28     | 28    | 0      | 1:27.12                  |
| 42 | TRUE   | 28     | 28    | 0      | 1:27.26                  |
| 43 | TRUE   | 28     | 28    | 0      | 1:27.25                  |
| 44 | TRUE   | 28     | 28    | 0      | 1:28.89                  |
| 45 | TRUE   | 28     | 28    | 0      | 1:26.78                  |
| 46 | TRUE   | 28     | 28    | 0      | 1:26.85                  |
| 47 | TRUE   | 28     | 28    | 0      | 1:28.88                  |
| 48 | TRUE   | 28     | 28    | 0      | 1:27.27                  |
| 49 | TRUE   | 28     | 28    | 0      | 1:27.23                  |

| <b>Id</b> | <b>Result</b> | <b>#total</b> | <b>#true</b> | <b>#false</b> | <b>Execution time (min:sec)</b> |
|-----------|---------------|---------------|--------------|---------------|---------------------------------|
| 50        | TRUE          | 28            | 28           | 0             | 1:26.89                         |
| 51        | TRUE          | 28            | 28           | 0             | 1:27.40                         |
| 52        | TRUE          | 28            | 28           | 0             | 1:27.14                         |
| 53        | TRUE          | 28            | 28           | 0             | 1:27.79                         |
| 54        | TRUE          | 28            | 28           | 0             | 1:27.30                         |
| 55        | TRUE          | 28            | 28           | 0             | 1:27.52                         |
| 56        | TRUE          | 28            | 28           | 0             | 1:26.75                         |
| 57        | TRUE          | 28            | 28           | 0             | 1:26.53                         |
| 58        | TRUE          | 28            | 28           | 0             | 1:27.00                         |
| 59        | TRUE          | 28            | 28           | 0             | 1:27.06                         |
| 60        | TRUE          | 28            | 28           | 0             | 1:27.49                         |
| 61        | TRUE          | 28            | 28           | 0             | 1:27.43                         |
| 62        | TRUE          | 28            | 28           | 0             | 1:27.05                         |
| 63        | TRUE          | 28            | 28           | 0             | 1:27.66                         |
| 64        | TRUE          | 28            | 28           | 0             | 1:26.96                         |
| 65        | TRUE          | 28            | 28           | 0             | 1:27.02                         |
| 66        | TRUE          | 28            | 28           | 0             | 1:26.20                         |
| 67        | TRUE          | 28            | 28           | 0             | 1:28.60                         |
| 68        | TRUE          | 28            | 28           | 0             | 1:27.37                         |
| 69        | TRUE          | 28            | 28           | 0             | 1:27.68                         |
| 70        | TRUE          | 28            | 28           | 0             | 1:27.56                         |
| 71        | TRUE          | 28            | 28           | 0             | 1:26.90                         |
| 72        | TRUE          | 28            | 28           | 0             | 1:27.81                         |
| 73        | TRUE          | 28            | 28           | 0             | 1:27.35                         |
| 74        | TRUE          | 28            | 28           | 0             | 1:27.87                         |
| 75        | TRUE          | 28            | 28           | 0             | 1:27.67                         |
| 76        | TRUE          | 28            | 28           | 0             | 1:27.25                         |
| 77        | TRUE          | 28            | 28           | 0             | 1:27.81                         |
| 78        | TRUE          | 28            | 28           | 0             | 1:27.21                         |
| 79        | TRUE          | 28            | 28           | 0             | 1:27.23                         |
| 80        | TRUE          | 28            | 28           | 0             | 1:28.02                         |
| 81        | TRUE          | 28            | 28           | 0             | 1:26.69                         |
| 82        | TRUE          | 28            | 28           | 0             | 1:27.81                         |
| 83        | TRUE          | 28            | 28           | 0             | 1:26.88                         |
| 84        | TRUE          | 28            | 28           | 0             | 1:27.57                         |
| 85        | TRUE          | 28            | 28           | 0             | 1:26.46                         |
| 86        | TRUE          | 28            | 28           | 0             | 1:27.65                         |
| 87        | TRUE          | 28            | 28           | 0             | 1:26.72                         |
| 88        | TRUE          | 28            | 28           | 0             | 1:27.59                         |
| 89        | TRUE          | 28            | 28           | 0             | 1:27.26                         |
| 90        | TRUE          | 28            | 28           | 0             | 1:27.70                         |
| 91        | TRUE          | 28            | 28           | 0             | 1:26.74                         |
| 92        | TRUE          | 28            | 28           | 0             | 1:27.09                         |
| 93        | TRUE          | 28            | 28           | 0             | 1:27.56                         |
| 94        | TRUE          | 28            | 28           | 0             | 1:26.94                         |
| 95        | TRUE          | 28            | 28           | 0             | 1:27.88                         |
| 96        | TRUE          | 28            | 28           | 0             | 1:26.72                         |
| 97        | TRUE          | 28            | 28           | 0             | 1:27.35                         |

| Id  | Result | #total | #true | #false | Execution time (min:sec) |
|-----|--------|--------|-------|--------|--------------------------|
| 98  | TRUE   | 28     | 28    | 0      | 1:29.12                  |
| 99  | TRUE   | 28     | 28    | 0      | 1:27.20                  |
| 100 | TRUE   | 28     | 28    | 0      | 1:27.00                  |
| 101 | TRUE   | 28     | 28    | 0      | 1:27.01                  |
| 102 | TRUE   | 28     | 28    | 0      | 1:26.47                  |
| 103 | TRUE   | 28     | 28    | 0      | 1:27.56                  |
| 104 | TRUE   | 28     | 28    | 0      | 1:26.85                  |
| 105 | TRUE   | 28     | 28    | 0      | 1:28.71                  |
| 106 | TRUE   | 28     | 28    | 0      | 1:26.95                  |
| 107 | TRUE   | 28     | 28    | 0      | 1:27.42                  |
| 108 | TRUE   | 28     | 28    | 0      | 1:26.78                  |
| 109 | TRUE   | 28     | 28    | 0      | 1:27.69                  |
| 110 | TRUE   | 28     | 28    | 0      | 1:26.81                  |
| 111 | TRUE   | 28     | 28    | 0      | 1:26.67                  |
| 112 | TRUE   | 28     | 28    | 0      | 1:28.15                  |
| 113 | TRUE   | 28     | 28    | 0      | 1:27.12                  |
| 114 | TRUE   | 28     | 28    | 0      | 1:27.88                  |
| 115 | TRUE   | 28     | 28    | 0      | 1:28.37                  |
| 116 | TRUE   | 28     | 28    | 0      | 1:28.32                  |
| 117 | TRUE   | 28     | 28    | 0      | 1:26.85                  |
| 118 | TRUE   | 28     | 28    | 0      | 1:27.43                  |
| 119 | TRUE   | 28     | 28    | 0      | 1:27.02                  |
| 120 | TRUE   | 28     | 28    | 0      | 1:26.49                  |
| 121 | TRUE   | 28     | 28    | 0      | 1:27.51                  |
| 122 | TRUE   | 28     | 28    | 0      | 1:27.00                  |
| 123 | TRUE   | 28     | 28    | 0      | 1:27.41                  |
| 124 | TRUE   | 28     | 28    | 0      | 1:27.08                  |
| 125 | TRUE   | 28     | 28    | 0      | 1:27.60                  |
| 126 | TRUE   | 28     | 28    | 0      | 1:25.65                  |
| 127 | TRUE   | 28     | 28    | 0      | 1:27.13                  |
| 128 | TRUE   | 28     | 28    | 0      | 1:26.71                  |
| 129 | TRUE   | 28     | 28    | 0      | 1:27.42                  |
| 130 | TRUE   | 28     | 28    | 0      | 1:26.97                  |
| 131 | TRUE   | 28     | 28    | 0      | 1:27.54                  |
| 132 | TRUE   | 28     | 28    | 0      | 1:27.11                  |
| 133 | TRUE   | 28     | 28    | 0      | 1:26.89                  |
| 134 | TRUE   | 28     | 28    | 0      | 1:26.99                  |
| 135 | TRUE   | 28     | 28    | 0      | 1:27.44                  |
| 136 | TRUE   | 28     | 28    | 0      | 1:27.33                  |
| 137 | TRUE   | 28     | 28    | 0      | 1:28.49                  |
| 138 | TRUE   | 28     | 28    | 0      | 1:26.80                  |
| 139 | TRUE   | 28     | 28    | 0      | 1:26.86                  |
| 140 | TRUE   | 28     | 28    | 0      | 1:27.43                  |
| 141 | TRUE   | 28     | 28    | 0      | 1:26.46                  |
| 142 | TRUE   | 28     | 28    | 0      | 1:28.72                  |
| 143 | TRUE   | 28     | 28    | 0      | 1:27.32                  |
| 144 | TRUE   | 28     | 28    | 0      | 1:26.84                  |
| 145 | TRUE   | 28     | 28    | 0      | 1:26.83                  |

| Id  | Result | #total | #true | #false | Execution time (min:sec) |
|-----|--------|--------|-------|--------|--------------------------|
| 146 | TRUE   | 28     | 28    | 0      | 1:27.19                  |
| 147 | TRUE   | 28     | 28    | 0      | 1:26.35                  |
| 148 | TRUE   | 28     | 28    | 0      | 1:28.59                  |
| 149 | TRUE   | 28     | 28    | 0      | 1:26.78                  |
| 150 | TRUE   | 28     | 28    | 0      | 1:27.05                  |
| 151 | TRUE   | 28     | 28    | 0      | 1:26.72                  |
| 152 | TRUE   | 28     | 28    | 0      | 1:27.13                  |
| 153 | TRUE   | 28     | 28    | 0      | 1:27.27                  |
| 154 | TRUE   | 28     | 28    | 0      | 1:27.05                  |
| 155 | TRUE   | 28     | 28    | 0      | 1:27.14                  |
| 156 | TRUE   | 28     | 28    | 0      | 1:26.37                  |
| 157 | TRUE   | 28     | 28    | 0      | 1:27.14                  |
| 158 | TRUE   | 28     | 28    | 0      | 1:27.19                  |
| 159 | TRUE   | 28     | 28    | 0      | 1:28.15                  |
| 160 | TRUE   | 28     | 28    | 0      | 1:27.32                  |
| 161 | TRUE   | 28     | 28    | 0      | 1:27.38                  |
| 162 | TRUE   | 28     | 28    | 0      | 1:28.18                  |
| 163 | TRUE   | 28     | 28    | 0      | 1:28.25                  |
| 164 | TRUE   | 28     | 28    | 0      | 1:27.08                  |
| 165 | TRUE   | 28     | 28    | 0      | 1:26.56                  |
| 166 | TRUE   | 28     | 28    | 0      | 1:27.50                  |
| 167 | TRUE   | 28     | 28    | 0      | 1:27.16                  |
| 168 | TRUE   | 28     | 28    | 0      | 1:27.88                  |
| 169 | TRUE   | 28     | 28    | 0      | 1:27.20                  |
| 170 | TRUE   | 28     | 28    | 0      | 1:27.22                  |
| 171 | TRUE   | 28     | 28    | 0      | 1:26.78                  |
| 172 | TRUE   | 28     | 28    | 0      | 1:27.18                  |
| 173 | TRUE   | 28     | 28    | 0      | 1:27.48                  |
| 174 | TRUE   | 28     | 28    | 0      | 1:26.81                  |
| 175 | TRUE   | 28     | 28    | 0      | 1:26.60                  |
| 176 | TRUE   | 28     | 28    | 0      | 1:27.07                  |
| 177 | TRUE   | 28     | 28    | 0      | 1:28.35                  |
| 178 | TRUE   | 28     | 28    | 0      | 1:26.89                  |
| 179 | TRUE   | 28     | 28    | 0      | 1:26.43                  |
| 180 | TRUE   | 28     | 28    | 0      | 1:26.77                  |
| 181 | TRUE   | 28     | 28    | 0      | 1:26.76                  |
| 182 | TRUE   | 28     | 28    | 0      | 1:27.68                  |
| 183 | TRUE   | 28     | 28    | 0      | 1:27.03                  |
| 184 | TRUE   | 28     | 28    | 0      | 1:27.37                  |
| 185 | TRUE   | 28     | 28    | 0      | 1:26.71                  |
| 186 | TRUE   | 28     | 28    | 0      | 1:26.96                  |
| 187 | TRUE   | 28     | 28    | 0      | 1:26.93                  |
| 188 | TRUE   | 28     | 28    | 0      | 1:26.53                  |
| 189 | TRUE   | 28     | 28    | 0      | 1:27.07                  |
| 190 | TRUE   | 28     | 28    | 0      | 1:27.60                  |
| 191 | TRUE   | 28     | 28    | 0      | 1:27.27                  |
| 192 | TRUE   | 28     | 28    | 0      | 1:27.34                  |
| 193 | TRUE   | 28     | 28    | 0      | 1:28.11                  |

| <b>Id</b> | <b>Result</b> | <b>#total</b> | <b>#true</b> | <b>#false</b> | <b>Execution time (min:sec)</b> |
|-----------|---------------|---------------|--------------|---------------|---------------------------------|
| 194       | TRUE          | 28            | 28           | 0             | 1:27.62                         |
| 195       | TRUE          | 28            | 28           | 0             | 1:27.69                         |
| 196       | TRUE          | 28            | 28           | 0             | 1:27.29                         |
| 197       | TRUE          | 28            | 28           | 0             | 1:28.19                         |
| 198       | TRUE          | 28            | 28           | 0             | 1:27.75                         |
| 199       | TRUE          | 28            | 28           | 0             | 1:28.01                         |
| 200       | TRUE          | 28            | 28           | 0             | 1:26.64                         |
| 201       | TRUE          | 28            | 28           | 0             | 1:27.09                         |
| 202       | TRUE          | 28            | 28           | 0             | 1:28.66                         |
| 203       | TRUE          | 28            | 28           | 0             | 1:26.68                         |
| 204       | TRUE          | 28            | 28           | 0             | 1:27.04                         |
| 205       | TRUE          | 28            | 28           | 0             | 1:27.22                         |
| 206       | TRUE          | 28            | 28           | 0             | 1:27.58                         |
| 207       | TRUE          | 28            | 28           | 0             | 1:27.14                         |
| 208       | TRUE          | 28            | 28           | 0             | 1:27.40                         |
| 209       | TRUE          | 28            | 28           | 0             | 1:27.71                         |
| 210       | TRUE          | 28            | 28           | 0             | 1:26.50                         |
| 211       | TRUE          | 28            | 28           | 0             | 1:28.34                         |
| 212       | TRUE          | 28            | 28           | 0             | 1:26.55                         |
| 213       | TRUE          | 28            | 28           | 0             | 1:27.44                         |
| 214       | TRUE          | 28            | 28           | 0             | 1:26.91                         |
| 215       | TRUE          | 28            | 28           | 0             | 1:27.13                         |
| 216       | TRUE          | 28            | 28           | 0             | 1:27.30                         |
| 217       | TRUE          | 28            | 28           | 0             | 1:26.94                         |
| 218       | TRUE          | 28            | 28           | 0             | 1:27.14                         |
| 219       | TRUE          | 28            | 28           | 0             | 1:26.71                         |
| 220       | TRUE          | 28            | 28           | 0             | 1:28.25                         |
| 221       | TRUE          | 28            | 28           | 0             | 1:27.42                         |
| 222       | TRUE          | 28            | 28           | 0             | 1:27.39                         |
| 223       | TRUE          | 28            | 28           | 0             | 1:27.53                         |
| 224       | TRUE          | 28            | 28           | 0             | 1:27.12                         |
| 225       | TRUE          | 28            | 28           | 0             | 1:27.39                         |
| 226       | TRUE          | 28            | 28           | 0             | 1:27.41                         |
| 227       | TRUE          | 28            | 28           | 0             | 1:27.83                         |
| 228       | TRUE          | 28            | 28           | 0             | 1:27.82                         |
| 229       | TRUE          | 28            | 28           | 0             | 1:27.04                         |
| 230       | TRUE          | 28            | 28           | 0             | 1:27.24                         |
| 231       | TRUE          | 28            | 28           | 0             | 1:26.95                         |
| 232       | TRUE          | 28            | 28           | 0             | 1:27.05                         |
| 233       | TRUE          | 28            | 28           | 0             | 1:27.63                         |
| 234       | TRUE          | 28            | 28           | 0             | 1:30.80                         |
| 235       | TRUE          | 28            | 28           | 0             | 1:27.38                         |
| 236       | TRUE          | 28            | 28           | 0             | 1:27.50                         |
| 237       | TRUE          | 28            | 28           | 0             | 1:27.83                         |
| 238       | TRUE          | 28            | 28           | 0             | 1:29.71                         |
| 239       | TRUE          | 28            | 28           | 0             | 1:27.91                         |
| 240       | TRUE          | 28            | 28           | 0             | 1:27.60                         |
| 241       | TRUE          | 28            | 28           | 0             | 1:27.84                         |

| <b>Id</b> | <b>Result</b> | <b>#total</b> | <b>#true</b> | <b>#false</b> | <b>Execution time (min:sec)</b> |
|-----------|---------------|---------------|--------------|---------------|---------------------------------|
| 242       | TRUE          | 28            | 28           | 0             | 1:27.06                         |
| 243       | TRUE          | 28            | 28           | 0             | 1:27.90                         |
| 244       | TRUE          | 28            | 28           | 0             | 1:28.43                         |
| 245       | TRUE          | 28            | 28           | 0             | 1:26.91                         |
| 246       | TRUE          | 28            | 28           | 0             | 1:28.33                         |
| 247       | TRUE          | 28            | 28           | 0             | 1:26.85                         |
| 248       | TRUE          | 28            | 28           | 0             | 1:29.37                         |
| 249       | TRUE          | 28            | 28           | 0             | 1:27.59                         |
| 250       | TRUE          | 28            | 28           | 0             | 1:27.34                         |
| 251       | TRUE          | 28            | 28           | 0             | 1:27.58                         |
| 252       | TRUE          | 28            | 28           | 0             | 1:27.19                         |
| 253       | TRUE          | 28            | 28           | 0             | 1:27.97                         |
| 254       | TRUE          | 28            | 28           | 0             | 1:27.67                         |
| 255       | TRUE          | 28            | 28           | 0             | 1:29.70                         |
| 256       | TRUE          | 28            | 28           | 0             | 1:27.91                         |
| 257       | TRUE          | 28            | 28           | 0             | 1:27.98                         |
| 258       | TRUE          | 28            | 28           | 0             | 1:26.26                         |
| 259       | TRUE          | 28            | 28           | 0             | 1:28.22                         |
| 260       | TRUE          | 28            | 28           | 0             | 1:26.94                         |
| 261       | TRUE          | 28            | 28           | 0             | 1:26.74                         |
| 262       | TRUE          | 28            | 28           | 0             | 1:26.82                         |
| 263       | TRUE          | 28            | 28           | 0             | 1:27.08                         |
| 264       | TRUE          | 28            | 28           | 0             | 1:27.11                         |
| 265       | TRUE          | 28            | 28           | 0             | 1:29.24                         |
| 266       | TRUE          | 28            | 28           | 0             | 1:26.75                         |
| 267       | TRUE          | 28            | 28           | 0             | 1:26.73                         |
| 268       | TRUE          | 28            | 28           | 0             | 1:27.49                         |
| 269       | TRUE          | 28            | 28           | 0             | 1:27.35                         |
| 270       | TRUE          | 28            | 28           | 0             | 1:26.13                         |
| 271       | TRUE          | 28            | 28           | 0             | 1:27.02                         |
| 272       | TRUE          | 28            | 28           | 0             | 1:28.26                         |
| 273       | TRUE          | 28            | 28           | 0             | 1:27.13                         |
| 274       | TRUE          | 28            | 28           | 0             | 1:28.83                         |
| 275       | TRUE          | 28            | 28           | 0             | 1:27.61                         |
| 276       | TRUE          | 28            | 28           | 0             | 1:27.53                         |
| 277       | TRUE          | 28            | 28           | 0             | 1:27.00                         |
| 278       | TRUE          | 28            | 28           | 0             | 1:27.67                         |
| 279       | TRUE          | 28            | 28           | 0             | 1:27.65                         |
| 280       | TRUE          | 28            | 28           | 0             | 1:28.25                         |
| 281       | TRUE          | 28            | 28           | 0             | 1:27.64                         |
| 282       | TRUE          | 28            | 28           | 0             | 1:27.94                         |
| 283       | TRUE          | 28            | 28           | 0             | 1:27.27                         |
| 284       | TRUE          | 28            | 28           | 0             | 1:26.70                         |
| 285       | TRUE          | 28            | 28           | 0             | 1:27.10                         |
| 286       | TRUE          | 28            | 28           | 0             | 1:27.18                         |
| 287       | TRUE          | 28            | 28           | 0             | 1:27.34                         |
| 288       | TRUE          | 28            | 28           | 0             | 1:27.25                         |
| 289       | TRUE          | 28            | 28           | 0             | 1:29.28                         |

| Id  | Result | #total | #true | #false | Execution time (min:sec) |
|-----|--------|--------|-------|--------|--------------------------|
| 290 | TRUE   | 28     | 28    | 0      | 1:27.79                  |
| 291 | TRUE   | 28     | 28    | 0      | 1:27.24                  |
| 292 | TRUE   | 28     | 28    | 0      | 1:27.06                  |
| 293 | TRUE   | 28     | 28    | 0      | 1:27.36                  |
| 294 | TRUE   | 28     | 28    | 0      | 1:26.51                  |
| 295 | TRUE   | 28     | 28    | 0      | 1:27.06                  |
| 296 | TRUE   | 28     | 28    | 0      | 1:26.52                  |
| 297 | TRUE   | 28     | 28    | 0      | 1:27.60                  |
| 298 | TRUE   | 28     | 28    | 0      | 1:26.44                  |
| 299 | TRUE   | 28     | 28    | 0      | 1:28.32                  |
| 300 | TRUE   | 28     | 28    | 0      | 1:28.57                  |
| 301 | TRUE   | 28     | 28    | 0      | 1:28.40                  |
| 302 | TRUE   | 28     | 28    | 0      | 1:27.66                  |
| 303 | TRUE   | 28     | 28    | 0      | 1:28.03                  |
| 304 | TRUE   | 28     | 28    | 0      | 1:27.20                  |
| 305 | TRUE   | 28     | 28    | 0      | 1:26.43                  |
| 306 | TRUE   | 28     | 28    | 0      | 1:27.22                  |
| 307 | TRUE   | 28     | 28    | 0      | 1:27.43                  |
| 308 | TRUE   | 28     | 28    | 0      | 1:27.46                  |
| 309 | TRUE   | 28     | 28    | 0      | 1:26.76                  |
| 310 | TRUE   | 28     | 28    | 0      | 1:29.14                  |
| 311 | TRUE   | 28     | 28    | 0      | 1:26.94                  |
| 312 | TRUE   | 28     | 28    | 0      | 1:26.69                  |
| 313 | TRUE   | 28     | 28    | 0      | 1:26.54                  |
| 314 | TRUE   | 28     | 28    | 0      | 1:26.85                  |
| 315 | TRUE   | 28     | 28    | 0      | 1:27.70                  |
| 316 | TRUE   | 28     | 28    | 0      | 1:29.37                  |
| 317 | TRUE   | 28     | 28    | 0      | 1:28.23                  |
| 318 | TRUE   | 28     | 28    | 0      | 1:27.54                  |
| 319 | TRUE   | 28     | 28    | 0      | 1:27.22                  |
| 320 | TRUE   | 28     | 28    | 0      | 1:27.87                  |
| 321 | TRUE   | 28     | 28    | 0      | 1:28.44                  |
| 322 | TRUE   | 28     | 28    | 0      | 1:28.30                  |
| 323 | TRUE   | 28     | 28    | 0      | 1:28.98                  |
| 324 | TRUE   | 28     | 28    | 0      | 1:28.82                  |
| 325 | TRUE   | 28     | 28    | 0      | 1:28.09                  |
| 326 | TRUE   | 28     | 28    | 0      | 1:25.39                  |
| 327 | TRUE   | 28     | 28    | 0      | 1:27.25                  |
| 328 | TRUE   | 28     | 28    | 0      | 1:27.35                  |
| 329 | TRUE   | 28     | 28    | 0      | 1:27.71                  |
| 330 | TRUE   | 28     | 28    | 0      | 1:28.01                  |
| 331 | TRUE   | 28     | 28    | 0      | 1:27.97                  |
| 332 | TRUE   | 28     | 28    | 0      | 1:27.43                  |
| 333 | TRUE   | 28     | 28    | 0      | 1:27.52                  |
| 334 | TRUE   | 28     | 28    | 0      | 1:27.70                  |
| 335 | TRUE   | 28     | 28    | 0      | 1:27.07                  |
| 336 | TRUE   | 28     | 28    | 0      | 1:26.87                  |
| 337 | TRUE   | 28     | 28    | 0      | 1:27.65                  |



| <b>Id</b> | <b>Result</b> | <b>#total</b> | <b>#true</b> | <b>#false</b> | <b>Execution time (min:sec)</b> |
|-----------|---------------|---------------|--------------|---------------|---------------------------------|
| 338       | TRUE          | 28            | 28           | 0             | 1:27.74                         |
| 339       | TRUE          | 28            | 28           | 0             | 1:27.74                         |
| 340       | TRUE          | 28            | 28           | 0             | 1:27.88                         |
| 341       | TRUE          | 28            | 28           | 0             | 1:27.08                         |
| 342       | TRUE          | 28            | 28           | 0             | 1:26.93                         |
| 343       | TRUE          | 28            | 28           | 0             | 1:27.74                         |
| 344       | TRUE          | 28            | 28           | 0             | 1:27.12                         |
| 345       | TRUE          | 28            | 28           | 0             | 1:27.22                         |
| 346       | TRUE          | 28            | 28           | 0             | 1:26.43                         |
| 347       | TRUE          | 28            | 28           | 0             | 1:28.46                         |
| 348       | TRUE          | 28            | 28           | 0             | 1:27.47                         |
| 349       | TRUE          | 28            | 28           | 0             | 1:27.39                         |
| 350       | TRUE          | 28            | 28           | 0             | 1:27.06                         |
| 351       | TRUE          | 28            | 28           | 0             | 1:28.96                         |
| 352       | TRUE          | 28            | 28           | 0             | 1:27.20                         |
| 353       | TRUE          | 28            | 28           | 0             | 1:27.02                         |
| 354       | TRUE          | 28            | 28           | 0             | 1:27.26                         |
| 355       | TRUE          | 28            | 28           | 0             | 1:27.16                         |
| 356       | TRUE          | 28            | 28           | 0             | 1:27.06                         |
| 357       | TRUE          | 28            | 28           | 0             | 1:27.81                         |
| 358       | TRUE          | 28            | 28           | 0             | 1:27.06                         |
| 359       | TRUE          | 28            | 28           | 0             | 1:27.42                         |
| 360       | TRUE          | 28            | 28           | 0             | 1:27.53                         |
| 361       | TRUE          | 28            | 28           | 0             | 1:27.21                         |
| 362       | TRUE          | 28            | 28           | 0             | 1:25.42                         |
| 363       | TRUE          | 28            | 28           | 0             | 1:26.95                         |
| 364       | TRUE          | 28            | 28           | 0             | 1:27.53                         |
| 365       | TRUE          | 28            | 28           | 0             | 1:27.37                         |
| 366       | TRUE          | 28            | 28           | 0             | 1:28.23                         |
| 367       | TRUE          | 28            | 28           | 0             | 1:24.77                         |
| 368       | TRUE          | 28            | 28           | 0             | 1:26.71                         |
| 369       | TRUE          | 28            | 28           | 0             | 1:27.10                         |
| 370       | TRUE          | 28            | 28           | 0             | 1:25.52                         |
| 371       | TRUE          | 28            | 28           | 0             | 1:27.27                         |
| 372       | TRUE          | 28            | 28           | 0             | 1:27.10                         |
| 373       | TRUE          | 28            | 28           | 0             | 1:27.48                         |
| 374       | TRUE          | 28            | 28           | 0             | 1:26.96                         |
| 375       | TRUE          | 28            | 28           | 0             | 1:27.23                         |
| 376       | TRUE          | 28            | 28           | 0             | 1:28.66                         |
| 377       | TRUE          | 28            | 28           | 0             | 1:26.67                         |
| 378       | TRUE          | 28            | 28           | 0             | 1:27.76                         |
| 379       | TRUE          | 28            | 28           | 0             | 1:27.15                         |
| 380       | TRUE          | 28            | 28           | 0             | 1:27.57                         |
| 381       | TRUE          | 28            | 28           | 0             | 1:26.52                         |
| 382       | TRUE          | 28            | 28           | 0             | 1:29.81                         |
| 383       | TRUE          | 28            | 28           | 0             | 1:27.51                         |
| 384       | TRUE          | 28            | 28           | 0             | 1:26.76                         |
| 385       | TRUE          | 28            | 28           | 0             | 1:28.06                         |

| <b>Id</b> | <b>Result</b> | <b>#total</b> | <b>#true</b> | <b>#false</b> | <b>Execution time (min:sec)</b> |
|-----------|---------------|---------------|--------------|---------------|---------------------------------|
| 386       | TRUE          | 28            | 28           | 0             | 1:27.12                         |
| 387       | TRUE          | 28            | 28           | 0             | 1:28.02                         |
| 388       | TRUE          | 28            | 28           | 0             | 1:26.95                         |
| 389       | TRUE          | 28            | 28           | 0             | 1:26.75                         |
| 390       | TRUE          | 28            | 28           | 0             | 1:26.58                         |
| 391       | TRUE          | 28            | 28           | 0             | 1:27.34                         |
| 392       | TRUE          | 28            | 28           | 0             | 1:27.40                         |
| 393       | TRUE          | 28            | 28           | 0             | 1:27.38                         |
| 394       | TRUE          | 28            | 28           | 0             | 1:27.59                         |
| 395       | TRUE          | 28            | 28           | 0             | 1:27.48                         |
| 396       | TRUE          | 28            | 28           | 0             | 1:28.45                         |
| 397       | TRUE          | 28            | 28           | 0             | 1:28.03                         |
| 398       | TRUE          | 28            | 28           | 0             | 1:26.16                         |
| 399       | TRUE          | 28            | 28           | 0             | 1:26.75                         |
| 400       | TRUE          | 28            | 28           | 0             | 1:25.77                         |
| 401       | TRUE          | 28            | 28           | 0             | 1:27.30                         |
| 402       | TRUE          | 28            | 28           | 0             | 1:27.99                         |
| 403       | TRUE          | 28            | 28           | 0             | 1:28.22                         |
| 404       | TRUE          | 28            | 28           | 0             | 1:26.64                         |
| 405       | TRUE          | 28            | 28           | 0             | 1:26.83                         |
| 406       | TRUE          | 28            | 28           | 0             | 1:26.25                         |
| 407       | TRUE          | 28            | 28           | 0             | 1:27.68                         |
| 408       | TRUE          | 28            | 28           | 0             | 1:28.09                         |
| 409       | TRUE          | 28            | 28           | 0             | 1:27.50                         |
| 410       | TRUE          | 28            | 28           | 0             | 1:26.25                         |
| 411       | TRUE          | 28            | 28           | 0             | 1:26.75                         |
| 412       | TRUE          | 28            | 28           | 0             | 1:26.70                         |
| 413       | TRUE          | 28            | 28           | 0             | 1:26.94                         |
| 414       | TRUE          | 28            | 28           | 0             | 1:28.59                         |
| 415       | TRUE          | 28            | 28           | 0             | 1:27.78                         |
| 416       | TRUE          | 28            | 28           | 0             | 1:27.14                         |
| 417       | TRUE          | 28            | 28           | 0             | 1:27.53                         |
| 418       | TRUE          | 28            | 28           | 0             | 1:27.61                         |
| 419       | TRUE          | 28            | 28           | 0             | 1:26.37                         |
| 420       | TRUE          | 28            | 28           | 0             | 1:27.59                         |
| 421       | TRUE          | 28            | 28           | 0             | 1:26.70                         |
| 422       | TRUE          | 28            | 28           | 0             | 1:27.40                         |
| 423       | TRUE          | 28            | 28           | 0             | 1:27.38                         |
| 424       | TRUE          | 28            | 28           | 0             | 1:26.96                         |
| 425       | TRUE          | 28            | 28           | 0             | 1:27.67                         |
| 426       | TRUE          | 28            | 28           | 0             | 1:27.37                         |
| 427       | TRUE          | 28            | 28           | 0             | 1:27.59                         |
| 428       | TRUE          | 28            | 28           | 0             | 1:27.40                         |
| 429       | TRUE          | 28            | 28           | 0             | 1:27.38                         |
| 430       | TRUE          | 28            | 28           | 0             | 1:27.08                         |
| 431       | TRUE          | 28            | 28           | 0             | 1:27.64                         |
| 432       | TRUE          | 28            | 28           | 0             | 1:26.19                         |
| 433       | TRUE          | 28            | 28           | 0             | 1:27.11                         |

| <b>Id</b> | <b>Result</b> | <b>#total</b> | <b>#true</b> | <b>#false</b> | <b>Execution time (min:sec)</b> |
|-----------|---------------|---------------|--------------|---------------|---------------------------------|
| 434       | TRUE          | 28            | 28           | 0             | 1:27.14                         |
| 435       | TRUE          | 28            | 28           | 0             | 1:27.08                         |
| 436       | TRUE          | 28            | 28           | 0             | 1:27.14                         |
| 437       | TRUE          | 28            | 28           | 0             | 1:27.38                         |
| 438       | TRUE          | 28            | 28           | 0             | 1:27.10                         |
| 439       | TRUE          | 28            | 28           | 0             | 1:27.24                         |
| 440       | TRUE          | 28            | 28           | 0             | 1:27.61                         |
| 441       | TRUE          | 28            | 28           | 0             | 1:27.15                         |
| 442       | TRUE          | 28            | 28           | 0             | 1:26.93                         |
| 443       | TRUE          | 28            | 28           | 0             | 1:27.52                         |
| 444       | TRUE          | 28            | 28           | 0             | 1:27.50                         |
| 445       | TRUE          | 28            | 28           | 0             | 1:27.75                         |
| 446       | TRUE          | 28            | 28           | 0             | 1:27.16                         |
| 447       | TRUE          | 28            | 28           | 0             | 1:27.57                         |
| 448       | TRUE          | 28            | 28           | 0             | 1:27.25                         |
| 449       | TRUE          | 28            | 28           | 0             | 1:26.99                         |
| 450       | TRUE          | 28            | 28           | 0             | 1:26.04                         |
| 451       | TRUE          | 28            | 28           | 0             | 1:27.97                         |
| 452       | TRUE          | 28            | 28           | 0             | 1:27.59                         |
| 453       | TRUE          | 28            | 28           | 0             | 1:27.76                         |
| 454       | TRUE          | 28            | 28           | 0             | 1:26.88                         |
| 455       | TRUE          | 28            | 28           | 0             | 1:27.25                         |
| 456       | TRUE          | 28            | 28           | 0             | 1:27.73                         |
| 457       | TRUE          | 28            | 28           | 0             | 1:27.11                         |
| 458       | TRUE          | 28            | 28           | 0             | 1:25.43                         |
| 459       | TRUE          | 28            | 28           | 0             | 1:27.80                         |
| 460       | TRUE          | 28            | 28           | 0             | 1:26.34                         |
| 461       | TRUE          | 28            | 28           | 0             | 1:27.08                         |
| 462       | TRUE          | 28            | 28           | 0             | 1:26.97                         |
| 463       | TRUE          | 28            | 28           | 0             | 1:27.83                         |
| 464       | TRUE          | 28            | 28           | 0             | 1:27.02                         |
| 465       | TRUE          | 28            | 28           | 0             | 1:27.14                         |
| 466       | TRUE          | 28            | 28           | 0             | 1:27.84                         |
| 467       | TRUE          | 28            | 28           | 0             | 1:27.28                         |
| 468       | TRUE          | 28            | 28           | 0             | 1:27.33                         |
| 469       | TRUE          | 28            | 28           | 0             | 1:28.86                         |
| 470       | TRUE          | 28            | 28           | 0             | 1:30.04                         |
| 471       | TRUE          | 28            | 28           | 0             | 1:27.59                         |
| 472       | TRUE          | 28            | 28           | 0             | 1:24.99                         |
| 473       | TRUE          | 28            | 28           | 0             | 1:27.22                         |
| 474       | TRUE          | 28            | 28           | 0             | 1:27.00                         |
| 475       | TRUE          | 28            | 28           | 0             | 1:27.74                         |
| 476       | TRUE          | 28            | 28           | 0             | 1:28.72                         |
| 477       | TRUE          | 28            | 28           | 0             | 1:27.19                         |
| 478       | TRUE          | 28            | 28           | 0             | 1:26.98                         |
| 479       | TRUE          | 28            | 28           | 0             | 1:27.32                         |
| 480       | TRUE          | 28            | 28           | 0             | 1:28.86                         |
| 481       | TRUE          | 28            | 28           | 0             | 1:27.55                         |

| <b>Id</b> | <b>Result</b> | <b>#total</b> | <b>#true</b> | <b>#false</b> | <b>Execution time (min:sec)</b> |
|-----------|---------------|---------------|--------------|---------------|---------------------------------|
| 482       | TRUE          | 28            | 28           | 0             | 1:27.00                         |
| 483       | TRUE          | 28            | 28           | 0             | 1:27.06                         |
| 484       | TRUE          | 28            | 28           | 0             | 1:27.72                         |
| 485       | TRUE          | 28            | 28           | 0             | 1:26.92                         |
| 486       | TRUE          | 28            | 28           | 0             | 1:27.15                         |
| 487       | TRUE          | 28            | 28           | 0             | 1:26.99                         |
| 488       | TRUE          | 28            | 28           | 0             | 1:26.96                         |
| 489       | TRUE          | 28            | 28           | 0             | 1:27.20                         |
| 490       | TRUE          | 28            | 28           | 0             | 1:27.40                         |
| 491       | TRUE          | 28            | 28           | 0             | 1:28.05                         |
| 492       | TRUE          | 28            | 28           | 0             | 1:26.61                         |
| 493       | TRUE          | 28            | 28           | 0             | 1:25.00                         |
| 494       | TRUE          | 28            | 28           | 0             | 1:27.24                         |
| 495       | TRUE          | 28            | 28           | 0             | 1:27.20                         |
| 496       | TRUE          | 28            | 28           | 0             | 1:28.39                         |
| 497       | TRUE          | 28            | 28           | 0             | 1:27.00                         |
| 498       | TRUE          | 28            | 28           | 0             | 1:27.32                         |
| 499       | TRUE          | 28            | 28           | 0             | 1:27.18                         |
| 500       | TRUE          | 28            | 28           | 0             | 1:27.10                         |

Table 2: Model checking results corresponding to PBLMSTL statement 11

| <b>Id</b> | <b>Result</b> | <b>#total</b> | <b>#true</b> | <b>#false</b> | <b>Execution time (min:sec)</b> |
|-----------|---------------|---------------|--------------|---------------|---------------------------------|
| 1         | TRUE          | 28            | 28           | 0             | 1:27.25                         |
| 2         | TRUE          | 28            | 28           | 0             | 1:26.91                         |
| 3         | TRUE          | 28            | 28           | 0             | 1:27.02                         |
| 4         | TRUE          | 28            | 28           | 0             | 1:29.28                         |
| 5         | TRUE          | 28            | 28           | 0             | 1:27.80                         |
| 6         | TRUE          | 28            | 28           | 0             | 1:27.06                         |
| 7         | TRUE          | 28            | 28           | 0             | 1:26.53                         |
| 8         | TRUE          | 28            | 28           | 0             | 1:27.64                         |
| 9         | TRUE          | 28            | 28           | 0             | 1:27.24                         |
| 10        | TRUE          | 28            | 28           | 0             | 1:26.73                         |
| 11        | TRUE          | 28            | 28           | 0             | 1:27.35                         |
| 12        | TRUE          | 28            | 28           | 0             | 1:28.92                         |
| 13        | TRUE          | 28            | 28           | 0             | 1:27.07                         |
| 14        | TRUE          | 28            | 28           | 0             | 1:27.03                         |
| 15        | TRUE          | 28            | 28           | 0             | 1:25.59                         |
| 16        | TRUE          | 28            | 28           | 0             | 1:26.48                         |
| 17        | TRUE          | 28            | 28           | 0             | 1:26.89                         |
| 18        | TRUE          | 28            | 28           | 0             | 1:27.50                         |
| 19        | TRUE          | 28            | 28           | 0             | 1:27.06                         |
| 20        | TRUE          | 28            | 28           | 0             | 1:26.99                         |
| 21        | TRUE          | 28            | 28           | 0             | 1:27.36                         |
| 22        | TRUE          | 28            | 28           | 0             | 1:27.52                         |

| <b>Id</b> | <b>Result</b> | <b>#total</b> | <b>#true</b> | <b>#false</b> | <b>Execution time (min:sec)</b> |
|-----------|---------------|---------------|--------------|---------------|---------------------------------|
| 23        | TRUE          | 28            | 28           | 0             | 1:27.16                         |
| 24        | TRUE          | 28            | 28           | 0             | 1:27.01                         |
| 25        | TRUE          | 28            | 28           | 0             | 1:27.13                         |
| 26        | TRUE          | 28            | 28           | 0             | 1:28.11                         |
| 27        | TRUE          | 28            | 28           | 0             | 1:28.07                         |
| 28        | TRUE          | 28            | 28           | 0             | 1:27.50                         |
| 29        | TRUE          | 28            | 28           | 0             | 1:27.07                         |
| 30        | TRUE          | 28            | 28           | 0             | 1:27.22                         |
| 31        | TRUE          | 28            | 28           | 0             | 1:26.57                         |
| 32        | TRUE          | 28            | 28           | 0             | 1:26.83                         |
| 33        | TRUE          | 28            | 28           | 0             | 1:27.59                         |
| 34        | TRUE          | 28            | 28           | 0             | 1:27.33                         |
| 35        | TRUE          | 28            | 28           | 0             | 1:27.04                         |
| 36        | TRUE          | 28            | 28           | 0             | 1:27.27                         |
| 37        | TRUE          | 28            | 28           | 0             | 1:28.45                         |
| 38        | TRUE          | 28            | 28           | 0             | 1:26.97                         |
| 39        | TRUE          | 28            | 28           | 0             | 1:27.16                         |
| 40        | TRUE          | 28            | 28           | 0             | 1:27.41                         |
| 41        | TRUE          | 28            | 28           | 0             | 1:27.18                         |
| 42        | TRUE          | 28            | 28           | 0             | 1:27.54                         |
| 43        | TRUE          | 28            | 28           | 0             | 1:28.78                         |
| 44        | TRUE          | 28            | 28           | 0             | 1:26.20                         |
| 45        | TRUE          | 28            | 28           | 0             | 1:26.70                         |
| 46        | TRUE          | 28            | 28           | 0             | 1:27.51                         |
| 47        | TRUE          | 28            | 28           | 0             | 1:26.10                         |
| 48        | TRUE          | 28            | 28           | 0             | 1:27.56                         |
| 49        | TRUE          | 28            | 28           | 0             | 1:26.91                         |
| 50        | TRUE          | 28            | 28           | 0             | 1:27.42                         |
| 51        | TRUE          | 28            | 28           | 0             | 1:27.15                         |
| 52        | TRUE          | 28            | 28           | 0             | 1:27.36                         |
| 53        | TRUE          | 28            | 28           | 0             | 1:27.19                         |
| 54        | TRUE          | 28            | 28           | 0             | 1:26.79                         |
| 55        | TRUE          | 28            | 28           | 0             | 1:28.88                         |
| 56        | TRUE          | 28            | 28           | 0             | 1:26.54                         |
| 57        | TRUE          | 28            | 28           | 0             | 1:27.25                         |
| 58        | TRUE          | 28            | 28           | 0             | 1:27.16                         |
| 59        | TRUE          | 28            | 28           | 0             | 1:26.87                         |
| 60        | TRUE          | 28            | 28           | 0             | 1:27.39                         |
| 61        | TRUE          | 28            | 28           | 0             | 1:27.17                         |
| 62        | TRUE          | 28            | 28           | 0             | 1:26.59                         |
| 63        | TRUE          | 28            | 28           | 0             | 1:27.13                         |
| 64        | TRUE          | 28            | 28           | 0             | 1:27.09                         |
| 65        | TRUE          | 28            | 28           | 0             | 1:27.13                         |
| 66        | TRUE          | 28            | 28           | 0             | 1:26.60                         |
| 67        | TRUE          | 28            | 28           | 0             | 1:27.94                         |
| 68        | TRUE          | 28            | 28           | 0             | 1:26.83                         |
| 69        | TRUE          | 28            | 28           | 0             | 1:27.80                         |
| 70        | TRUE          | 28            | 28           | 0             | 1:27.03                         |

| <b>Id</b> | <b>Result</b> | <b>#total</b> | <b>#true</b> | <b>#false</b> | <b>Execution time (min:sec)</b> |
|-----------|---------------|---------------|--------------|---------------|---------------------------------|
| 71        | TRUE          | 28            | 28           | 0             | 1:26.71                         |
| 72        | TRUE          | 28            | 28           | 0             | 1:26.87                         |
| 73        | TRUE          | 28            | 28           | 0             | 1:29.52                         |
| 74        | TRUE          | 28            | 28           | 0             | 1:26.86                         |
| 75        | TRUE          | 28            | 28           | 0             | 1:27.13                         |
| 76        | TRUE          | 28            | 28           | 0             | 1:26.97                         |
| 77        | TRUE          | 28            | 28           | 0             | 1:27.42                         |
| 78        | TRUE          | 28            | 28           | 0             | 1:27.20                         |
| 79        | TRUE          | 28            | 28           | 0             | 1:27.49                         |
| 80        | TRUE          | 28            | 28           | 0             | 1:26.76                         |
| 81        | TRUE          | 28            | 28           | 0             | 1:29.64                         |
| 82        | TRUE          | 28            | 28           | 0             | 1:26.49                         |
| 83        | TRUE          | 28            | 28           | 0             | 1:26.80                         |
| 84        | TRUE          | 28            | 28           | 0             | 1:27.37                         |
| 85        | TRUE          | 28            | 28           | 0             | 1:26.82                         |
| 86        | TRUE          | 28            | 28           | 0             | 1:26.97                         |
| 87        | TRUE          | 28            | 28           | 0             | 1:26.45                         |
| 88        | TRUE          | 28            | 28           | 0             | 1:26.63                         |
| 89        | TRUE          | 28            | 28           | 0             | 1:26.87                         |
| 90        | TRUE          | 28            | 28           | 0             | 1:27.67                         |
| 91        | TRUE          | 28            | 28           | 0             | 1:26.41                         |
| 92        | TRUE          | 28            | 28           | 0             | 1:29.82                         |
| 93        | TRUE          | 28            | 28           | 0             | 1:30.76                         |
| 94        | TRUE          | 28            | 28           | 0             | 1:33.71                         |
| 95        | TRUE          | 28            | 28           | 0             | 1:34.63                         |
| 96        | TRUE          | 28            | 28           | 0             | 1:34.07                         |
| 97        | TRUE          | 28            | 28           | 0             | 1:34.01                         |
| 98        | TRUE          | 28            | 28           | 0             | 1:33.59                         |
| 99        | TRUE          | 28            | 28           | 0             | 1:34.27                         |
| 100       | TRUE          | 28            | 28           | 0             | 1:33.67                         |
| 101       | TRUE          | 28            | 28           | 0             | 1:32.88                         |
| 102       | TRUE          | 28            | 28           | 0             | 1:33.17                         |
| 103       | TRUE          | 28            | 28           | 0             | 1:32.93                         |
| 104       | TRUE          | 28            | 28           | 0             | 1:33.36                         |
| 105       | TRUE          | 28            | 28           | 0             | 1:34.38                         |
| 106       | TRUE          | 28            | 28           | 0             | 1:34.03                         |
| 107       | TRUE          | 28            | 28           | 0             | 1:34.21                         |
| 108       | TRUE          | 28            | 28           | 0             | 1:34.49                         |
| 109       | TRUE          | 28            | 28           | 0             | 1:34.51                         |
| 110       | TRUE          | 28            | 28           | 0             | 1:34.20                         |
| 111       | TRUE          | 28            | 28           | 0             | 1:34.24                         |
| 112       | TRUE          | 28            | 28           | 0             | 1:33.93                         |
| 113       | TRUE          | 28            | 28           | 0             | 1:33.04                         |
| 114       | TRUE          | 28            | 28           | 0             | 1:29.11                         |
| 115       | TRUE          | 28            | 28           | 0             | 1:30.11                         |
| 116       | TRUE          | 28            | 28           | 0             | 1:30.47                         |
| 117       | TRUE          | 28            | 28           | 0             | 1:30.58                         |
| 118       | TRUE          | 28            | 28           | 0             | 1:30.21                         |

| Id  | Result | #total | #true | #false | Execution time (min:sec) |
|-----|--------|--------|-------|--------|--------------------------|
| 119 | TRUE   | 28     | 28    | 0      | 1:31.21                  |
| 120 | TRUE   | 28     | 28    | 0      | 1:30.06                  |
| 121 | TRUE   | 28     | 28    | 0      | 1:27.92                  |
| 122 | TRUE   | 28     | 28    | 0      | 1:29.38                  |
| 123 | TRUE   | 28     | 28    | 0      | 1:30.49                  |
| 124 | TRUE   | 28     | 28    | 0      | 1:30.29                  |
| 125 | TRUE   | 28     | 28    | 0      | 1:29.58                  |
| 126 | TRUE   | 28     | 28    | 0      | 1:29.47                  |
| 127 | TRUE   | 28     | 28    | 0      | 1:30.07                  |
| 128 | TRUE   | 28     | 28    | 0      | 1:29.67                  |
| 129 | TRUE   | 28     | 28    | 0      | 1:30.43                  |
| 130 | TRUE   | 28     | 28    | 0      | 1:31.03                  |
| 131 | TRUE   | 28     | 28    | 0      | 1:30.64                  |
| 132 | TRUE   | 28     | 28    | 0      | 1:30.40                  |
| 133 | TRUE   | 28     | 28    | 0      | 1:30.61                  |
| 134 | TRUE   | 28     | 28    | 0      | 1:30.70                  |
| 135 | TRUE   | 28     | 28    | 0      | 1:31.74                  |
| 136 | TRUE   | 28     | 28    | 0      | 1:30.09                  |
| 137 | TRUE   | 28     | 28    | 0      | 1:30.49                  |
| 138 | TRUE   | 28     | 28    | 0      | 1:30.26                  |
| 139 | TRUE   | 28     | 28    | 0      | 1:30.50                  |
| 140 | TRUE   | 28     | 28    | 0      | 1:30.71                  |
| 141 | TRUE   | 28     | 28    | 0      | 1:30.06                  |
| 142 | TRUE   | 28     | 28    | 0      | 1:30.35                  |
| 143 | TRUE   | 28     | 28    | 0      | 1:30.93                  |
| 144 | TRUE   | 28     | 28    | 0      | 1:30.67                  |
| 145 | TRUE   | 28     | 28    | 0      | 1:30.44                  |
| 146 | TRUE   | 28     | 28    | 0      | 1:30.03                  |
| 147 | TRUE   | 28     | 28    | 0      | 1:30.05                  |
| 148 | TRUE   | 28     | 28    | 0      | 1:30.82                  |
| 149 | TRUE   | 28     | 28    | 0      | 1:31.77                  |
| 150 | TRUE   | 28     | 28    | 0      | 1:30.39                  |
| 151 | TRUE   | 28     | 28    | 0      | 1:30.67                  |
| 152 | TRUE   | 28     | 28    | 0      | 1:30.18                  |
| 153 | TRUE   | 28     | 28    | 0      | 1:32.57                  |
| 154 | TRUE   | 28     | 28    | 0      | 1:30.01                  |
| 155 | TRUE   | 28     | 28    | 0      | 1:30.69                  |
| 156 | TRUE   | 28     | 28    | 0      | 1:30.15                  |
| 157 | TRUE   | 28     | 28    | 0      | 1:31.50                  |
| 158 | TRUE   | 28     | 28    | 0      | 1:30.29                  |
| 159 | TRUE   | 28     | 28    | 0      | 1:30.66                  |
| 160 | TRUE   | 28     | 28    | 0      | 1:30.60                  |
| 161 | TRUE   | 28     | 28    | 0      | 1:30.22                  |
| 162 | TRUE   | 28     | 28    | 0      | 1:29.94                  |
| 163 | TRUE   | 28     | 28    | 0      | 1:30.27                  |
| 164 | TRUE   | 28     | 28    | 0      | 1:30.53                  |
| 165 | TRUE   | 28     | 28    | 0      | 1:30.31                  |
| 166 | TRUE   | 28     | 28    | 0      | 1:28.87                  |

| <b>Id</b> | <b>Result</b> | <b>#total</b> | <b>#true</b> | <b>#false</b> | <b>Execution time (min:sec)</b> |
|-----------|---------------|---------------|--------------|---------------|---------------------------------|
| 167       | TRUE          | 28            | 28           | 0             | 1:32.42                         |
| 168       | TRUE          | 28            | 28           | 0             | 1:30.41                         |
| 169       | TRUE          | 28            | 28           | 0             | 1:29.96                         |
| 170       | TRUE          | 28            | 28           | 0             | 1:30.72                         |
| 171       | TRUE          | 28            | 28           | 0             | 1:30.44                         |
| 172       | TRUE          | 28            | 28           | 0             | 1:30.06                         |
| 173       | TRUE          | 28            | 28           | 0             | 1:30.64                         |
| 174       | TRUE          | 28            | 28           | 0             | 1:30.07                         |
| 175       | TRUE          | 28            | 28           | 0             | 1:30.41                         |
| 176       | TRUE          | 28            | 28           | 0             | 1:29.73                         |
| 177       | TRUE          | 28            | 28           | 0             | 1:30.94                         |
| 178       | TRUE          | 28            | 28           | 0             | 1:30.07                         |
| 179       | TRUE          | 28            | 28           | 0             | 1:30.59                         |
| 180       | TRUE          | 28            | 28           | 0             | 1:31.38                         |
| 181       | TRUE          | 28            | 28           | 0             | 1:29.92                         |
| 182       | TRUE          | 28            | 28           | 0             | 1:30.84                         |
| 183       | TRUE          | 28            | 28           | 0             | 1:31.37                         |
| 184       | TRUE          | 28            | 28           | 0             | 1:30.05                         |
| 185       | TRUE          | 28            | 28           | 0             | 1:32.00                         |
| 186       | TRUE          | 28            | 28           | 0             | 1:31.96                         |
| 187       | TRUE          | 28            | 28           | 0             | 1:31.18                         |
| 188       | TRUE          | 28            | 28           | 0             | 1:30.31                         |
| 189       | TRUE          | 28            | 28           | 0             | 1:30.16                         |
| 190       | TRUE          | 28            | 28           | 0             | 1:30.26                         |
| 191       | TRUE          | 28            | 28           | 0             | 1:29.87                         |
| 192       | TRUE          | 28            | 28           | 0             | 1:30.53                         |
| 193       | TRUE          | 28            | 28           | 0             | 1:31.24                         |
| 194       | TRUE          | 28            | 28           | 0             | 1:29.12                         |
| 195       | TRUE          | 28            | 28           | 0             | 1:30.21                         |
| 196       | TRUE          | 28            | 28           | 0             | 1:30.61                         |
| 197       | TRUE          | 28            | 28           | 0             | 1:30.28                         |
| 198       | TRUE          | 28            | 28           | 0             | 1:31.25                         |
| 199       | TRUE          | 28            | 28           | 0             | 1:29.77                         |
| 200       | TRUE          | 28            | 28           | 0             | 1:30.63                         |
| 201       | TRUE          | 28            | 28           | 0             | 1:31.01                         |
| 202       | TRUE          | 28            | 28           | 0             | 1:28.98                         |
| 203       | TRUE          | 28            | 28           | 0             | 1:30.81                         |
| 204       | TRUE          | 28            | 28           | 0             | 1:30.92                         |
| 205       | TRUE          | 28            | 28           | 0             | 1:30.19                         |
| 206       | TRUE          | 28            | 28           | 0             | 1:30.59                         |
| 207       | TRUE          | 28            | 28           | 0             | 1:30.36                         |
| 208       | TRUE          | 28            | 28           | 0             | 1:29.81                         |
| 209       | TRUE          | 28            | 28           | 0             | 1:29.78                         |
| 210       | TRUE          | 28            | 28           | 0             | 1:29.84                         |
| 211       | TRUE          | 28            | 28           | 0             | 1:30.52                         |
| 212       | TRUE          | 28            | 28           | 0             | 1:30.12                         |
| 213       | TRUE          | 28            | 28           | 0             | 1:30.60                         |
| 214       | TRUE          | 28            | 28           | 0             | 1:30.34                         |



| <b>Id</b> | <b>Result</b> | <b>#total</b> | <b>#true</b> | <b>#false</b> | <b>Execution time (min:sec)</b> |
|-----------|---------------|---------------|--------------|---------------|---------------------------------|
| 215       | TRUE          | 28            | 28           | 0             | 1:30.35                         |
| 216       | TRUE          | 28            | 28           | 0             | 1:30.26                         |
| 217       | TRUE          | 28            | 28           | 0             | 1:30.84                         |
| 218       | TRUE          | 28            | 28           | 0             | 1:29.95                         |
| 219       | TRUE          | 28            | 28           | 0             | 1:31.59                         |
| 220       | TRUE          | 28            | 28           | 0             | 1:30.30                         |
| 221       | TRUE          | 28            | 28           | 0             | 1:29.95                         |
| 222       | TRUE          | 28            | 28           | 0             | 1:30.66                         |
| 223       | TRUE          | 28            | 28           | 0             | 1:30.19                         |
| 224       | TRUE          | 28            | 28           | 0             | 1:31.82                         |
| 225       | TRUE          | 28            | 28           | 0             | 1:29.68                         |
| 226       | TRUE          | 28            | 28           | 0             | 1:30.81                         |
| 227       | TRUE          | 28            | 28           | 0             | 1:29.95                         |
| 228       | TRUE          | 28            | 28           | 0             | 1:30.56                         |
| 229       | TRUE          | 28            | 28           | 0             | 1:30.35                         |
| 230       | TRUE          | 28            | 28           | 0             | 1:30.25                         |
| 231       | TRUE          | 28            | 28           | 0             | 1:30.16                         |
| 232       | TRUE          | 28            | 28           | 0             | 1:31.75                         |
| 233       | TRUE          | 28            | 28           | 0             | 1:31.70                         |
| 234       | TRUE          | 28            | 28           | 0             | 1:30.49                         |
| 235       | TRUE          | 28            | 28           | 0             | 1:30.84                         |
| 236       | TRUE          | 28            | 28           | 0             | 1:31.05                         |
| 237       | TRUE          | 28            | 28           | 0             | 1:30.81                         |
| 238       | TRUE          | 28            | 28           | 0             | 1:31.22                         |
| 239       | TRUE          | 28            | 28           | 0             | 1:30.82                         |
| 240       | TRUE          | 28            | 28           | 0             | 1:30.50                         |
| 241       | TRUE          | 28            | 28           | 0             | 1:29.87                         |
| 242       | TRUE          | 28            | 28           | 0             | 1:30.09                         |
| 243       | TRUE          | 28            | 28           | 0             | 1:29.46                         |
| 244       | TRUE          | 28            | 28           | 0             | 1:30.68                         |
| 245       | TRUE          | 28            | 28           | 0             | 1:30.46                         |
| 246       | TRUE          | 28            | 28           | 0             | 1:32.00                         |
| 247       | TRUE          | 28            | 28           | 0             | 1:30.60                         |
| 248       | TRUE          | 28            | 28           | 0             | 1:30.57                         |
| 249       | TRUE          | 28            | 28           | 0             | 1:31.12                         |
| 250       | TRUE          | 28            | 28           | 0             | 1:30.47                         |
| 251       | TRUE          | 28            | 28           | 0             | 1:32.50                         |
| 252       | TRUE          | 28            | 28           | 0             | 1:30.25                         |
| 253       | TRUE          | 28            | 28           | 0             | 1:30.65                         |
| 254       | TRUE          | 28            | 28           | 0             | 1:30.90                         |
| 255       | TRUE          | 28            | 28           | 0             | 1:32.19                         |
| 256       | TRUE          | 28            | 28           | 0             | 1:31.88                         |
| 257       | TRUE          | 28            | 28           | 0             | 1:31.53                         |
| 258       | TRUE          | 28            | 28           | 0             | 1:30.62                         |
| 259       | TRUE          | 28            | 28           | 0             | 1:30.88                         |
| 260       | TRUE          | 28            | 28           | 0             | 1:29.87                         |
| 261       | TRUE          | 28            | 28           | 0             | 1:30.47                         |
| 262       | TRUE          | 28            | 28           | 0             | 1:30.43                         |

| <b>Id</b> | <b>Result</b> | <b>#total</b> | <b>#true</b> | <b>#false</b> | <b>Execution time (min:sec)</b> |
|-----------|---------------|---------------|--------------|---------------|---------------------------------|
| 263       | TRUE          | 28            | 28           | 0             | 1:30.49                         |
| 264       | TRUE          | 28            | 28           | 0             | 1:29.70                         |
| 265       | TRUE          | 28            | 28           | 0             | 1:30.83                         |
| 266       | TRUE          | 28            | 28           | 0             | 1:30.02                         |
| 267       | TRUE          | 28            | 28           | 0             | 1:30.49                         |
| 268       | TRUE          | 28            | 28           | 0             | 1:30.60                         |
| 269       | TRUE          | 28            | 28           | 0             | 1:30.63                         |
| 270       | TRUE          | 28            | 28           | 0             | 1:31.02                         |
| 271       | TRUE          | 28            | 28           | 0             | 1:31.93                         |
| 272       | TRUE          | 28            | 28           | 0             | 1:30.00                         |
| 273       | TRUE          | 28            | 28           | 0             | 1:30.46                         |
| 274       | TRUE          | 28            | 28           | 0             | 1:30.68                         |
| 275       | TRUE          | 28            | 28           | 0             | 1:30.98                         |
| 276       | TRUE          | 28            | 28           | 0             | 1:30.45                         |
| 277       | TRUE          | 28            | 28           | 0             | 1:30.41                         |
| 278       | TRUE          | 28            | 28           | 0             | 1:30.87                         |
| 279       | TRUE          | 28            | 28           | 0             | 1:30.75                         |
| 280       | TRUE          | 28            | 28           | 0             | 1:30.67                         |
| 281       | TRUE          | 28            | 28           | 0             | 1:30.52                         |
| 282       | TRUE          | 28            | 28           | 0             | 1:30.17                         |
| 283       | TRUE          | 28            | 28           | 0             | 1:30.76                         |
| 284       | TRUE          | 28            | 28           | 0             | 1:30.62                         |
| 285       | TRUE          | 28            | 28           | 0             | 1:30.77                         |
| 286       | TRUE          | 28            | 28           | 0             | 1:29.04                         |
| 287       | TRUE          | 28            | 28           | 0             | 1:30.23                         |
| 288       | TRUE          | 28            | 28           | 0             | 1:30.29                         |
| 289       | TRUE          | 28            | 28           | 0             | 1:30.33                         |
| 290       | TRUE          | 28            | 28           | 0             | 1:30.48                         |
| 291       | TRUE          | 28            | 28           | 0             | 1:30.18                         |
| 292       | TRUE          | 28            | 28           | 0             | 1:30.23                         |
| 293       | TRUE          | 28            | 28           | 0             | 1:30.35                         |
| 294       | TRUE          | 28            | 28           | 0             | 1:29.74                         |
| 295       | TRUE          | 28            | 28           | 0             | 1:30.09                         |
| 296       | TRUE          | 28            | 28           | 0             | 1:31.51                         |
| 297       | TRUE          | 28            | 28           | 0             | 1:32.18                         |
| 298       | TRUE          | 28            | 28           | 0             | 1:30.61                         |
| 299       | TRUE          | 28            | 28           | 0             | 1:30.66                         |
| 300       | TRUE          | 28            | 28           | 0             | 1:29.95                         |
| 301       | TRUE          | 28            | 28           | 0             | 1:29.77                         |
| 302       | TRUE          | 28            | 28           | 0             | 1:31.71                         |
| 303       | TRUE          | 28            | 28           | 0             | 1:31.66                         |
| 304       | TRUE          | 28            | 28           | 0             | 1:30.28                         |
| 305       | TRUE          | 28            | 28           | 0             | 1:30.63                         |
| 306       | TRUE          | 28            | 28           | 0             | 1:29.82                         |
| 307       | TRUE          | 28            | 28           | 0             | 1:32.57                         |
| 308       | TRUE          | 28            | 28           | 0             | 1:30.43                         |
| 309       | TRUE          | 28            | 28           | 0             | 1:30.40                         |
| 310       | TRUE          | 28            | 28           | 0             | 1:32.85                         |

| Id  | Result | #total | #true | #false | Execution time (min:sec) |
|-----|--------|--------|-------|--------|--------------------------|
| 311 | TRUE   | 28     | 28    | 0      | 1:30.50                  |
| 312 | TRUE   | 28     | 28    | 0      | 1:30.67                  |
| 313 | TRUE   | 28     | 28    | 0      | 1:29.91                  |
| 314 | TRUE   | 28     | 28    | 0      | 1:29.55                  |
| 315 | TRUE   | 28     | 28    | 0      | 1:30.18                  |
| 316 | TRUE   | 28     | 28    | 0      | 1:31.22                  |
| 317 | TRUE   | 28     | 28    | 0      | 1:30.42                  |
| 318 | TRUE   | 28     | 28    | 0      | 1:30.54                  |
| 319 | TRUE   | 28     | 28    | 0      | 1:30.22                  |
| 320 | TRUE   | 28     | 28    | 0      | 1:30.27                  |
| 321 | TRUE   | 28     | 28    | 0      | 1:30.26                  |
| 322 | TRUE   | 28     | 28    | 0      | 1:30.53                  |
| 323 | TRUE   | 28     | 28    | 0      | 1:32.08                  |
| 324 | TRUE   | 28     | 28    | 0      | 1:32.50                  |
| 325 | TRUE   | 28     | 28    | 0      | 1:30.78                  |
| 326 | TRUE   | 28     | 28    | 0      | 1:28.96                  |
| 327 | TRUE   | 28     | 28    | 0      | 1:30.77                  |
| 328 | TRUE   | 28     | 28    | 0      | 1:30.87                  |
| 329 | TRUE   | 28     | 28    | 0      | 1:30.26                  |
| 330 | TRUE   | 28     | 28    | 0      | 1:30.05                  |
| 331 | TRUE   | 28     | 28    | 0      | 1:30.24                  |
| 332 | TRUE   | 28     | 28    | 0      | 1:30.57                  |
| 333 | TRUE   | 28     | 28    | 0      | 1:29.59                  |
| 334 | TRUE   | 28     | 28    | 0      | 1:30.61                  |
| 335 | TRUE   | 28     | 28    | 0      | 1:30.08                  |
| 336 | TRUE   | 28     | 28    | 0      | 1:30.07                  |
| 337 | TRUE   | 28     | 28    | 0      | 1:30.05                  |
| 338 | TRUE   | 28     | 28    | 0      | 1:29.77                  |
| 339 | TRUE   | 28     | 28    | 0      | 1:29.90                  |
| 340 | TRUE   | 28     | 28    | 0      | 1:31.52                  |
| 341 | TRUE   | 28     | 28    | 0      | 1:30.30                  |
| 342 | TRUE   | 28     | 28    | 0      | 1:29.80                  |
| 343 | TRUE   | 28     | 28    | 0      | 1:30.01                  |
| 344 | TRUE   | 28     | 28    | 0      | 1:29.26                  |
| 345 | TRUE   | 28     | 28    | 0      | 1:30.91                  |
| 346 | TRUE   | 28     | 28    | 0      | 1:30.02                  |
| 347 | TRUE   | 28     | 28    | 0      | 1:30.74                  |
| 348 | TRUE   | 28     | 28    | 0      | 1:31.41                  |
| 349 | TRUE   | 28     | 28    | 0      | 1:30.77                  |
| 350 | TRUE   | 28     | 28    | 0      | 1:29.65                  |
| 351 | TRUE   | 28     | 28    | 0      | 1:30.41                  |
| 352 | TRUE   | 28     | 28    | 0      | 1:30.95                  |
| 353 | TRUE   | 28     | 28    | 0      | 1:30.01                  |
| 354 | TRUE   | 28     | 28    | 0      | 1:30.55                  |
| 355 | TRUE   | 28     | 28    | 0      | 1:32.58                  |
| 356 | TRUE   | 28     | 28    | 0      | 1:29.72                  |
| 357 | TRUE   | 28     | 28    | 0      | 1:29.30                  |
| 358 | TRUE   | 28     | 28    | 0      | 1:29.88                  |

| <b>Id</b> | <b>Result</b> | <b>#total</b> | <b>#true</b> | <b>#false</b> | <b>Execution time (min:sec)</b> |
|-----------|---------------|---------------|--------------|---------------|---------------------------------|
| 359       | TRUE          | 28            | 28           | 0             | 1:30.67                         |
| 360       | TRUE          | 28            | 28           | 0             | 1:30.57                         |
| 361       | TRUE          | 28            | 28           | 0             | 1:30.90                         |
| 362       | TRUE          | 28            | 28           | 0             | 1:30.86                         |
| 363       | TRUE          | 28            | 28           | 0             | 1:30.98                         |
| 364       | TRUE          | 28            | 28           | 0             | 1:30.84                         |
| 365       | TRUE          | 28            | 28           | 0             | 1:30.69                         |
| 366       | TRUE          | 28            | 28           | 0             | 1:31.13                         |
| 367       | TRUE          | 28            | 28           | 0             | 1:29.55                         |
| 368       | TRUE          | 28            | 28           | 0             | 1:30.26                         |
| 369       | TRUE          | 28            | 28           | 0             | 1:31.08                         |
| 370       | TRUE          | 28            | 28           | 0             | 1:30.91                         |
| 371       | TRUE          | 28            | 28           | 0             | 1:30.54                         |
| 372       | TRUE          | 28            | 28           | 0             | 1:30.63                         |
| 373       | TRUE          | 28            | 28           | 0             | 1:30.29                         |
| 374       | TRUE          | 28            | 28           | 0             | 1:30.07                         |
| 375       | TRUE          | 28            | 28           | 0             | 1:29.95                         |
| 376       | TRUE          | 28            | 28           | 0             | 1:30.45                         |
| 377       | TRUE          | 28            | 28           | 0             | 1:31.22                         |
| 378       | TRUE          | 28            | 28           | 0             | 1:31.84                         |
| 379       | TRUE          | 28            | 28           | 0             | 1:30.77                         |
| 380       | TRUE          | 28            | 28           | 0             | 1:31.13                         |
| 381       | TRUE          | 28            | 28           | 0             | 1:30.77                         |
| 382       | TRUE          | 28            | 28           | 0             | 1:30.78                         |
| 383       | TRUE          | 28            | 28           | 0             | 1:30.43                         |
| 384       | TRUE          | 28            | 28           | 0             | 1:30.08                         |
| 385       | TRUE          | 28            | 28           | 0             | 1:30.36                         |
| 386       | TRUE          | 28            | 28           | 0             | 1:30.16                         |
| 387       | TRUE          | 28            | 28           | 0             | 1:30.81                         |
| 388       | TRUE          | 28            | 28           | 0             | 1:30.14                         |
| 389       | TRUE          | 28            | 28           | 0             | 1:31.86                         |
| 390       | TRUE          | 28            | 28           | 0             | 1:30.93                         |
| 391       | TRUE          | 28            | 28           | 0             | 1:29.56                         |
| 392       | TRUE          | 28            | 28           | 0             | 1:32.35                         |
| 393       | TRUE          | 28            | 28           | 0             | 1:29.95                         |
| 394       | TRUE          | 28            | 28           | 0             | 1:30.21                         |
| 395       | TRUE          | 28            | 28           | 0             | 1:29.75                         |
| 396       | TRUE          | 28            | 28           | 0             | 1:32.38                         |
| 397       | TRUE          | 28            | 28           | 0             | 1:29.41                         |
| 398       | TRUE          | 28            | 28           | 0             | 1:29.70                         |
| 399       | TRUE          | 28            | 28           | 0             | 1:29.92                         |
| 400       | TRUE          | 28            | 28           | 0             | 1:29.95                         |
| 401       | TRUE          | 28            | 28           | 0             | 1:30.73                         |
| 402       | TRUE          | 28            | 28           | 0             | 1:30.12                         |
| 403       | TRUE          | 28            | 28           | 0             | 1:31.85                         |
| 404       | TRUE          | 28            | 28           | 0             | 1:32.41                         |
| 405       | TRUE          | 28            | 28           | 0             | 1:31.01                         |
| 406       | TRUE          | 28            | 28           | 0             | 1:30.19                         |

| <b>Id</b> | <b>Result</b> | <b>#total</b> | <b>#true</b> | <b>#false</b> | <b>Execution time (min:sec)</b> |
|-----------|---------------|---------------|--------------|---------------|---------------------------------|
| 407       | TRUE          | 28            | 28           | 0             | 1:30.02                         |
| 408       | TRUE          | 28            | 28           | 0             | 1:30.50                         |
| 409       | TRUE          | 28            | 28           | 0             | 1:28.99                         |
| 410       | TRUE          | 28            | 28           | 0             | 1:31.37                         |
| 411       | TRUE          | 28            | 28           | 0             | 1:30.81                         |
| 412       | TRUE          | 28            | 28           | 0             | 1:33.00                         |
| 413       | TRUE          | 28            | 28           | 0             | 1:34.24                         |
| 414       | TRUE          | 28            | 28           | 0             | 1:35.58                         |
| 415       | TRUE          | 28            | 28           | 0             | 1:33.18                         |
| 416       | TRUE          | 28            | 28           | 0             | 1:34.59                         |
| 417       | TRUE          | 28            | 28           | 0             | 1:34.97                         |
| 418       | TRUE          | 28            | 28           | 0             | 1:34.86                         |
| 419       | TRUE          | 28            | 28           | 0             | 1:35.43                         |
| 420       | TRUE          | 28            | 28           | 0             | 1:34.46                         |
| 421       | TRUE          | 28            | 28           | 0             | 1:34.34                         |
| 422       | TRUE          | 28            | 28           | 0             | 1:34.16                         |
| 423       | TRUE          | 28            | 28           | 0             | 1:34.22                         |
| 424       | TRUE          | 28            | 28           | 0             | 1:34.13                         |
| 425       | TRUE          | 28            | 28           | 0             | 1:34.14                         |
| 426       | TRUE          | 28            | 28           | 0             | 1:33.95                         |
| 427       | TRUE          | 28            | 28           | 0             | 1:33.94                         |
| 428       | TRUE          | 28            | 28           | 0             | 1:34.08                         |
| 429       | TRUE          | 28            | 28           | 0             | 1:34.61                         |
| 430       | TRUE          | 28            | 28           | 0             | 1:33.91                         |
| 431       | TRUE          | 28            | 28           | 0             | 1:33.63                         |
| 432       | TRUE          | 28            | 28           | 0             | 1:33.81                         |
| 433       | TRUE          | 28            | 28           | 0             | 1:34.40                         |
| 434       | TRUE          | 28            | 28           | 0             | 1:34.18                         |
| 435       | TRUE          | 28            | 28           | 0             | 1:34.81                         |
| 436       | TRUE          | 28            | 28           | 0             | 1:35.15                         |
| 437       | TRUE          | 28            | 28           | 0             | 1:34.41                         |
| 438       | TRUE          | 28            | 28           | 0             | 1:35.36                         |
| 439       | TRUE          | 28            | 28           | 0             | 1:35.62                         |
| 440       | TRUE          | 28            | 28           | 0             | 1:34.40                         |
| 441       | TRUE          | 28            | 28           | 0             | 1:34.05                         |
| 442       | TRUE          | 28            | 28           | 0             | 1:34.63                         |
| 443       | TRUE          | 28            | 28           | 0             | 1:33.69                         |
| 444       | TRUE          | 28            | 28           | 0             | 1:34.18                         |
| 445       | TRUE          | 28            | 28           | 0             | 1:33.95                         |
| 446       | TRUE          | 28            | 28           | 0             | 1:35.63                         |
| 447       | TRUE          | 28            | 28           | 0             | 1:33.79                         |
| 448       | TRUE          | 28            | 28           | 0             | 1:34.56                         |
| 449       | TRUE          | 28            | 28           | 0             | 1:33.55                         |
| 450       | TRUE          | 28            | 28           | 0             | 1:34.60                         |
| 451       | TRUE          | 28            | 28           | 0             | 1:34.78                         |
| 452       | TRUE          | 28            | 28           | 0             | 1:35.02                         |
| 453       | TRUE          | 28            | 28           | 0             | 1:34.31                         |
| 454       | TRUE          | 28            | 28           | 0             | 1:33.93                         |

| <b>Id</b> | <b>Result</b> | <b>#total</b> | <b>#true</b> | <b>#false</b> | <b>Execution time (min:sec)</b> |
|-----------|---------------|---------------|--------------|---------------|---------------------------------|
| 455       | TRUE          | 28            | 28           | 0             | 1:35.02                         |
| 456       | TRUE          | 28            | 28           | 0             | 1:33.53                         |
| 457       | TRUE          | 28            | 28           | 0             | 1:31.93                         |
| 458       | TRUE          | 28            | 28           | 0             | 1:34.02                         |
| 459       | TRUE          | 28            | 28           | 0             | 1:34.30                         |
| 460       | TRUE          | 28            | 28           | 0             | 1:34.64                         |
| 461       | TRUE          | 28            | 28           | 0             | 1:33.93                         |
| 462       | TRUE          | 28            | 28           | 0             | 1:33.38                         |
| 463       | TRUE          | 28            | 28           | 0             | 1:34.14                         |
| 464       | TRUE          | 28            | 28           | 0             | 1:33.62                         |
| 465       | TRUE          | 28            | 28           | 0             | 1:33.89                         |
| 466       | TRUE          | 28            | 28           | 0             | 1:30.87                         |
| 467       | TRUE          | 28            | 28           | 0             | 1:28.31                         |
| 468       | TRUE          | 28            | 28           | 0             | 1:28.41                         |
| 469       | TRUE          | 28            | 28           | 0             | 1:28.83                         |
| 470       | TRUE          | 28            | 28           | 0             | 1:28.02                         |
| 471       | TRUE          | 28            | 28           | 0             | 1:26.95                         |
| 472       | TRUE          | 28            | 28           | 0             | 1:27.10                         |
| 473       | TRUE          | 28            | 28           | 0             | 1:27.64                         |
| 474       | TRUE          | 28            | 28           | 0             | 1:27.83                         |
| 475       | TRUE          | 28            | 28           | 0             | 1:26.64                         |
| 476       | TRUE          | 28            | 28           | 0             | 1:27.91                         |
| 477       | TRUE          | 28            | 28           | 0             | 1:27.45                         |
| 478       | TRUE          | 28            | 28           | 0             | 1:27.23                         |
| 479       | TRUE          | 28            | 28           | 0             | 1:28.58                         |
| 480       | TRUE          | 28            | 28           | 0             | 1:27.23                         |
| 481       | TRUE          | 28            | 28           | 0             | 1:27.66                         |
| 482       | TRUE          | 28            | 28           | 0             | 1:27.02                         |
| 483       | TRUE          | 28            | 28           | 0             | 1:28.00                         |
| 484       | TRUE          | 28            | 28           | 0             | 1:28.02                         |
| 485       | TRUE          | 28            | 28           | 0             | 1:26.46                         |
| 486       | TRUE          | 28            | 28           | 0             | 1:27.15                         |
| 487       | TRUE          | 28            | 28           | 0             | 1:27.95                         |
| 488       | TRUE          | 28            | 28           | 0             | 1:27.71                         |
| 489       | TRUE          | 28            | 28           | 0             | 1:26.59                         |
| 490       | TRUE          | 28            | 28           | 0             | 1:27.95                         |
| 491       | TRUE          | 28            | 28           | 0             | 1:28.00                         |
| 492       | TRUE          | 28            | 28           | 0             | 1:26.41                         |
| 493       | TRUE          | 28            | 28           | 0             | 1:28.93                         |
| 494       | TRUE          | 28            | 28           | 0             | 1:27.24                         |
| 495       | TRUE          | 28            | 28           | 0             | 1:26.83                         |
| 496       | TRUE          | 28            | 28           | 0             | 1:26.96                         |
| 497       | TRUE          | 28            | 28           | 0             | 1:27.35                         |
| 498       | TRUE          | 28            | 28           | 0             | 1:27.03                         |
| 499       | TRUE          | 28            | 28           | 0             | 1:27.65                         |
| 500       | TRUE          | 28            | 28           | 0             | 1:27.94                         |

Table 3: Model checking results corresponding to PBLMSTL statement 12

| <b>Id</b> | <b>Result</b> | <b>#total</b> | <b>#true</b> | <b>#false</b> | <b>Execution time (min:sec)</b> |
|-----------|---------------|---------------|--------------|---------------|---------------------------------|
| 1         | TRUE          | 28            | 28           | 0             | 1:27.31                         |
| 2         | TRUE          | 28            | 28           | 0             | 1:27.19                         |
| 3         | TRUE          | 28            | 28           | 0             | 1:27.63                         |
| 4         | TRUE          | 28            | 28           | 0             | 1:26.51                         |
| 5         | TRUE          | 28            | 28           | 0             | 1:28.55                         |
| 6         | TRUE          | 28            | 28           | 0             | 1:28.47                         |
| 7         | TRUE          | 28            | 28           | 0             | 1:28.58                         |
| 8         | TRUE          | 28            | 28           | 0             | 1:27.95                         |
| 9         | TRUE          | 28            | 28           | 0             | 1:26.98                         |
| 10        | TRUE          | 28            | 28           | 0             | 1:28.38                         |
| 11        | TRUE          | 28            | 28           | 0             | 1:27.70                         |
| 12        | TRUE          | 28            | 28           | 0             | 1:26.37                         |
| 13        | TRUE          | 28            | 28           | 0             | 1:26.78                         |
| 14        | TRUE          | 28            | 28           | 0             | 1:27.45                         |
| 15        | TRUE          | 28            | 28           | 0             | 1:26.48                         |
| 16        | TRUE          | 28            | 28           | 0             | 1:26.84                         |
| 17        | TRUE          | 28            | 28           | 0             | 1:26.36                         |
| 18        | TRUE          | 28            | 28           | 0             | 1:26.56                         |
| 19        | TRUE          | 28            | 28           | 0             | 1:26.70                         |
| 20        | TRUE          | 28            | 28           | 0             | 1:26.71                         |
| 21        | TRUE          | 28            | 28           | 0             | 1:26.83                         |
| 22        | TRUE          | 28            | 28           | 0             | 1:26.94                         |
| 23        | TRUE          | 28            | 28           | 0             | 1:27.79                         |
| 24        | TRUE          | 28            | 28           | 0             | 1:27.56                         |
| 25        | TRUE          | 28            | 28           | 0             | 1:26.94                         |
| 26        | TRUE          | 28            | 28           | 0             | 1:24.56                         |
| 27        | TRUE          | 28            | 28           | 0             | 1:26.70                         |
| 28        | TRUE          | 28            | 28           | 0             | 1:26.18                         |
| 29        | TRUE          | 28            | 28           | 0             | 1:26.28                         |
| 30        | TRUE          | 28            | 28           | 0             | 1:27.25                         |
| 31        | TRUE          | 28            | 28           | 0             | 1:25.99                         |
| 32        | TRUE          | 28            | 28           | 0             | 1:27.05                         |
| 33        | TRUE          | 28            | 28           | 0             | 1:28.00                         |
| 34        | TRUE          | 28            | 28           | 0             | 1:27.01                         |
| 35        | TRUE          | 28            | 28           | 0             | 1:26.93                         |
| 36        | TRUE          | 28            | 28           | 0             | 1:26.57                         |
| 37        | TRUE          | 28            | 28           | 0             | 1:29.24                         |
| 38        | TRUE          | 28            | 28           | 0             | 1:26.88                         |
| 39        | TRUE          | 28            | 28           | 0             | 1:26.70                         |
| 40        | TRUE          | 28            | 28           | 0             | 1:27.31                         |
| 41        | TRUE          | 28            | 28           | 0             | 1:27.15                         |
| 42        | TRUE          | 28            | 28           | 0             | 1:26.21                         |
| 43        | TRUE          | 28            | 28           | 0             | 1:26.96                         |
| 44        | TRUE          | 28            | 28           | 0             | 1:26.42                         |
| 45        | TRUE          | 28            | 28           | 0             | 1:27.75                         |
| 46        | TRUE          | 28            | 28           | 0             | 1:25.74                         |

| <b>Id</b> | <b>Result</b> | <b>#total</b> | <b>#true</b> | <b>#false</b> | <b>Execution time (min:sec)</b> |
|-----------|---------------|---------------|--------------|---------------|---------------------------------|
| 47        | TRUE          | 28            | 28           | 0             | 1:27.55                         |
| 48        | TRUE          | 28            | 28           | 0             | 1:30.54                         |
| 49        | TRUE          | 28            | 28           | 0             | 1:26.74                         |
| 50        | TRUE          | 28            | 28           | 0             | 1:26.36                         |
| 51        | TRUE          | 28            | 28           | 0             | 1:27.03                         |
| 52        | TRUE          | 28            | 28           | 0             | 1:26.83                         |
| 53        | TRUE          | 28            | 28           | 0             | 1:27.11                         |
| 54        | TRUE          | 28            | 28           | 0             | 1:27.33                         |
| 55        | TRUE          | 28            | 28           | 0             | 1:26.57                         |
| 56        | TRUE          | 28            | 28           | 0             | 1:26.92                         |
| 57        | TRUE          | 28            | 28           | 0             | 1:27.19                         |
| 58        | TRUE          | 28            | 28           | 0             | 1:27.29                         |
| 59        | TRUE          | 28            | 28           | 0             | 1:26.93                         |
| 60        | TRUE          | 28            | 28           | 0             | 1:27.37                         |
| 61        | TRUE          | 28            | 28           | 0             | 1:26.80                         |
| 62        | TRUE          | 28            | 28           | 0             | 1:26.20                         |
| 63        | TRUE          | 28            | 28           | 0             | 1:27.09                         |
| 64        | TRUE          | 28            | 28           | 0             | 1:27.19                         |
| 65        | TRUE          | 28            | 28           | 0             | 1:27.12                         |
| 66        | TRUE          | 28            | 28           | 0             | 1:26.38                         |
| 67        | TRUE          | 28            | 28           | 0             | 1:26.33                         |
| 68        | TRUE          | 28            | 28           | 0             | 1:27.56                         |
| 69        | TRUE          | 28            | 28           | 0             | 1:27.00                         |
| 70        | TRUE          | 28            | 28           | 0             | 1:26.59                         |
| 71        | TRUE          | 28            | 28           | 0             | 1:26.61                         |
| 72        | TRUE          | 28            | 28           | 0             | 1:27.08                         |
| 73        | TRUE          | 28            | 28           | 0             | 1:25.99                         |
| 74        | TRUE          | 28            | 28           | 0             | 1:26.88                         |
| 75        | TRUE          | 28            | 28           | 0             | 1:27.26                         |
| 76        | TRUE          | 28            | 28           | 0             | 1:26.35                         |
| 77        | TRUE          | 28            | 28           | 0             | 1:27.67                         |
| 78        | TRUE          | 28            | 28           | 0             | 1:26.42                         |
| 79        | TRUE          | 28            | 28           | 0             | 1:26.30                         |
| 80        | TRUE          | 28            | 28           | 0             | 1:26.07                         |
| 81        | TRUE          | 28            | 28           | 0             | 1:27.38                         |
| 82        | TRUE          | 28            | 28           | 0             | 1:26.98                         |
| 83        | TRUE          | 28            | 28           | 0             | 1:26.98                         |
| 84        | TRUE          | 28            | 28           | 0             | 1:28.55                         |
| 85        | TRUE          | 28            | 28           | 0             | 1:26.37                         |
| 86        | TRUE          | 28            | 28           | 0             | 1:26.41                         |
| 87        | TRUE          | 28            | 28           | 0             | 1:26.64                         |
| 88        | TRUE          | 28            | 28           | 0             | 1:25.92                         |
| 89        | TRUE          | 28            | 28           | 0             | 1:27.58                         |
| 90        | TRUE          | 28            | 28           | 0             | 1:27.13                         |
| 91        | TRUE          | 28            | 28           | 0             | 1:27.72                         |
| 92        | TRUE          | 28            | 28           | 0             | 1:26.69                         |
| 93        | TRUE          | 28            | 28           | 0             | 1:27.12                         |
| 94        | TRUE          | 28            | 28           | 0             | 1:28.42                         |



| Id  | Result | #total | #true | #false | Execution time (min:sec) |
|-----|--------|--------|-------|--------|--------------------------|
| 95  | TRUE   | 28     | 28    | 0      | 1:26.60                  |
| 96  | TRUE   | 28     | 28    | 0      | 1:25.83                  |
| 97  | TRUE   | 28     | 28    | 0      | 1:26.83                  |
| 98  | TRUE   | 28     | 28    | 0      | 1:27.34                  |
| 99  | TRUE   | 28     | 28    | 0      | 1:26.98                  |
| 100 | TRUE   | 28     | 28    | 0      | 1:26.98                  |
| 101 | TRUE   | 28     | 28    | 0      | 1:28.27                  |
| 102 | TRUE   | 28     | 28    | 0      | 1:27.19                  |
| 103 | TRUE   | 28     | 28    | 0      | 1:28.74                  |
| 104 | TRUE   | 28     | 28    | 0      | 1:26.66                  |
| 105 | TRUE   | 28     | 28    | 0      | 1:27.04                  |
| 106 | TRUE   | 28     | 28    | 0      | 1:26.87                  |
| 107 | TRUE   | 28     | 28    | 0      | 1:26.71                  |
| 108 | TRUE   | 28     | 28    | 0      | 1:28.62                  |
| 109 | TRUE   | 28     | 28    | 0      | 1:26.31                  |
| 110 | TRUE   | 28     | 28    | 0      | 1:26.52                  |
| 111 | TRUE   | 28     | 28    | 0      | 1:26.97                  |
| 112 | TRUE   | 28     | 28    | 0      | 1:26.60                  |
| 113 | TRUE   | 28     | 28    | 0      | 1:26.66                  |
| 114 | TRUE   | 28     | 28    | 0      | 1:28.74                  |
| 115 | TRUE   | 28     | 28    | 0      | 1:27.02                  |
| 116 | TRUE   | 28     | 28    | 0      | 1:27.37                  |
| 117 | TRUE   | 28     | 28    | 0      | 1:26.22                  |
| 118 | TRUE   | 28     | 28    | 0      | 1:27.10                  |
| 119 | TRUE   | 28     | 28    | 0      | 1:26.64                  |
| 120 | TRUE   | 28     | 28    | 0      | 1:26.70                  |
| 121 | TRUE   | 28     | 28    | 0      | 1:26.81                  |
| 122 | TRUE   | 28     | 28    | 0      | 1:27.18                  |
| 123 | TRUE   | 28     | 28    | 0      | 1:26.91                  |
| 124 | TRUE   | 28     | 28    | 0      | 1:27.76                  |
| 125 | TRUE   | 28     | 28    | 0      | 1:27.90                  |
| 126 | TRUE   | 28     | 28    | 0      | 1:27.18                  |
| 127 | TRUE   | 28     | 28    | 0      | 1:27.41                  |
| 128 | TRUE   | 28     | 28    | 0      | 1:27.08                  |
| 129 | TRUE   | 28     | 28    | 0      | 1:26.17                  |
| 130 | TRUE   | 28     | 28    | 0      | 1:27.07                  |
| 131 | TRUE   | 28     | 28    | 0      | 1:26.73                  |
| 132 | TRUE   | 28     | 28    | 0      | 1:25.97                  |
| 133 | TRUE   | 28     | 28    | 0      | 1:26.63                  |
| 134 | TRUE   | 28     | 28    | 0      | 1:27.13                  |
| 135 | TRUE   | 28     | 28    | 0      | 1:26.94                  |
| 136 | TRUE   | 28     | 28    | 0      | 1:26.83                  |
| 137 | TRUE   | 28     | 28    | 0      | 1:26.84                  |
| 138 | TRUE   | 28     | 28    | 0      | 1:27.13                  |
| 139 | TRUE   | 28     | 28    | 0      | 1:27.44                  |
| 140 | TRUE   | 28     | 28    | 0      | 1:27.99                  |
| 141 | TRUE   | 28     | 28    | 0      | 1:26.50                  |
| 142 | TRUE   | 28     | 28    | 0      | 1:26.54                  |

| Id  | Result | #total | #true | #false | Execution time (min:sec) |
|-----|--------|--------|-------|--------|--------------------------|
| 143 | TRUE   | 28     | 28    | 0      | 1:26.47                  |
| 144 | TRUE   | 28     | 28    | 0      | 1:26.45                  |
| 145 | TRUE   | 28     | 28    | 0      | 1:27.21                  |
| 146 | TRUE   | 28     | 28    | 0      | 1:26.84                  |
| 147 | TRUE   | 28     | 28    | 0      | 1:27.30                  |
| 148 | TRUE   | 28     | 28    | 0      | 1:26.80                  |
| 149 | TRUE   | 28     | 28    | 0      | 1:26.74                  |
| 150 | TRUE   | 28     | 28    | 0      | 1:26.94                  |
| 151 | TRUE   | 28     | 28    | 0      | 1:26.44                  |
| 152 | TRUE   | 28     | 28    | 0      | 1:27.22                  |
| 153 | TRUE   | 28     | 28    | 0      | 1:27.07                  |
| 154 | TRUE   | 28     | 28    | 0      | 1:27.00                  |
| 155 | TRUE   | 28     | 28    | 0      | 1:27.58                  |
| 156 | TRUE   | 28     | 28    | 0      | 1:26.40                  |
| 157 | TRUE   | 28     | 28    | 0      | 1:27.02                  |
| 158 | TRUE   | 28     | 28    | 0      | 1:26.77                  |
| 159 | TRUE   | 28     | 28    | 0      | 1:26.85                  |
| 160 | TRUE   | 28     | 28    | 0      | 1:26.83                  |
| 161 | TRUE   | 28     | 28    | 0      | 1:27.31                  |
| 162 | TRUE   | 28     | 28    | 0      | 1:26.50                  |
| 163 | TRUE   | 28     | 28    | 0      | 1:26.71                  |
| 164 | TRUE   | 28     | 28    | 0      | 1:27.50                  |
| 165 | TRUE   | 28     | 28    | 0      | 1:27.21                  |
| 166 | TRUE   | 28     | 28    | 0      | 1:28.84                  |
| 167 | TRUE   | 28     | 28    | 0      | 1:26.49                  |
| 168 | TRUE   | 28     | 28    | 0      | 1:26.55                  |
| 169 | TRUE   | 28     | 28    | 0      | 1:26.31                  |
| 170 | TRUE   | 28     | 28    | 0      | 1:27.05                  |
| 171 | TRUE   | 28     | 28    | 0      | 1:26.39                  |
| 172 | TRUE   | 28     | 28    | 0      | 1:27.04                  |
| 173 | TRUE   | 28     | 28    | 0      | 1:27.33                  |
| 174 | TRUE   | 28     | 28    | 0      | 1:27.07                  |
| 175 | TRUE   | 28     | 28    | 0      | 1:26.63                  |
| 176 | TRUE   | 28     | 28    | 0      | 1:26.54                  |
| 177 | TRUE   | 28     | 28    | 0      | 1:26.70                  |
| 178 | TRUE   | 28     | 28    | 0      | 1:26.70                  |
| 179 | TRUE   | 28     | 28    | 0      | 1:28.17                  |
| 180 | TRUE   | 28     | 28    | 0      | 1:26.48                  |
| 181 | TRUE   | 28     | 28    | 0      | 1:26.91                  |
| 182 | TRUE   | 28     | 28    | 0      | 1:28.49                  |
| 183 | TRUE   | 28     | 28    | 0      | 1:29.16                  |
| 184 | TRUE   | 28     | 28    | 0      | 1:27.44                  |
| 185 | TRUE   | 28     | 28    | 0      | 1:26.05                  |
| 186 | TRUE   | 28     | 28    | 0      | 1:26.46                  |
| 187 | TRUE   | 28     | 28    | 0      | 1:28.51                  |
| 188 | TRUE   | 28     | 28    | 0      | 1:26.74                  |
| 189 | TRUE   | 28     | 28    | 0      | 1:29.16                  |
| 190 | TRUE   | 28     | 28    | 0      | 1:27.41                  |

| <b>Id</b> | <b>Result</b> | <b>#total</b> | <b>#true</b> | <b>#false</b> | <b>Execution time (min:sec)</b> |
|-----------|---------------|---------------|--------------|---------------|---------------------------------|
| 191       | TRUE          | 28            | 28           | 0             | 1:26.28                         |
| 192       | TRUE          | 28            | 28           | 0             | 1:26.53                         |
| 193       | TRUE          | 28            | 28           | 0             | 1:27.28                         |
| 194       | TRUE          | 28            | 28           | 0             | 1:27.15                         |
| 195       | TRUE          | 28            | 28           | 0             | 1:27.25                         |
| 196       | TRUE          | 28            | 28           | 0             | 1:26.74                         |
| 197       | TRUE          | 28            | 28           | 0             | 1:26.73                         |
| 198       | TRUE          | 28            | 28           | 0             | 1:26.94                         |
| 199       | TRUE          | 28            | 28           | 0             | 1:27.02                         |
| 200       | TRUE          | 28            | 28           | 0             | 1:26.91                         |
| 201       | TRUE          | 28            | 28           | 0             | 1:27.65                         |
| 202       | TRUE          | 28            | 28           | 0             | 1:26.91                         |
| 203       | TRUE          | 28            | 28           | 0             | 1:26.67                         |
| 204       | TRUE          | 28            | 28           | 0             | 1:26.34                         |
| 205       | TRUE          | 28            | 28           | 0             | 1:28.18                         |
| 206       | TRUE          | 28            | 28           | 0             | 1:26.98                         |
| 207       | TRUE          | 28            | 28           | 0             | 1:27.12                         |
| 208       | TRUE          | 28            | 28           | 0             | 1:27.06                         |
| 209       | TRUE          | 28            | 28           | 0             | 1:26.25                         |
| 210       | TRUE          | 28            | 28           | 0             | 1:26.94                         |
| 211       | TRUE          | 28            | 28           | 0             | 1:26.43                         |
| 212       | TRUE          | 28            | 28           | 0             | 1:27.25                         |
| 213       | TRUE          | 28            | 28           | 0             | 1:27.10                         |
| 214       | TRUE          | 28            | 28           | 0             | 1:28.38                         |
| 215       | TRUE          | 28            | 28           | 0             | 1:27.09                         |
| 216       | TRUE          | 28            | 28           | 0             | 1:27.89                         |
| 217       | TRUE          | 28            | 28           | 0             | 1:27.68                         |
| 218       | TRUE          | 28            | 28           | 0             | 1:27.37                         |
| 219       | TRUE          | 28            | 28           | 0             | 1:26.74                         |
| 220       | TRUE          | 28            | 28           | 0             | 1:26.94                         |
| 221       | TRUE          | 28            | 28           | 0             | 1:26.53                         |
| 222       | TRUE          | 28            | 28           | 0             | 1:26.53                         |
| 223       | TRUE          | 28            | 28           | 0             | 1:27.63                         |
| 224       | TRUE          | 28            | 28           | 0             | 1:26.86                         |
| 225       | TRUE          | 28            | 28           | 0             | 1:27.32                         |
| 226       | TRUE          | 28            | 28           | 0             | 1:27.70                         |
| 227       | TRUE          | 28            | 28           | 0             | 1:27.40                         |
| 228       | TRUE          | 28            | 28           | 0             | 1:26.38                         |
| 229       | TRUE          | 28            | 28           | 0             | 1:27.37                         |
| 230       | TRUE          | 28            | 28           | 0             | 1:27.90                         |
| 231       | TRUE          | 28            | 28           | 0             | 1:27.85                         |
| 232       | TRUE          | 28            | 28           | 0             | 1:28.78                         |
| 233       | TRUE          | 28            | 28           | 0             | 1:26.77                         |
| 234       | TRUE          | 28            | 28           | 0             | 1:27.86                         |
| 235       | TRUE          | 28            | 28           | 0             | 1:27.74                         |
| 236       | TRUE          | 28            | 28           | 0             | 1:26.85                         |
| 237       | TRUE          | 28            | 28           | 0             | 1:26.83                         |
| 238       | TRUE          | 28            | 28           | 0             | 1:26.30                         |

| <b>Id</b> | <b>Result</b> | <b>#total</b> | <b>#true</b> | <b>#false</b> | <b>Execution time (min:sec)</b> |
|-----------|---------------|---------------|--------------|---------------|---------------------------------|
| 239       | TRUE          | 28            | 28           | 0             | 1:26.96                         |
| 240       | TRUE          | 28            | 28           | 0             | 1:26.59                         |
| 241       | TRUE          | 28            | 28           | 0             | 1:26.87                         |
| 242       | TRUE          | 28            | 28           | 0             | 1:26.76                         |
| 243       | TRUE          | 28            | 28           | 0             | 1:26.84                         |
| 244       | TRUE          | 28            | 28           | 0             | 1:26.36                         |
| 245       | TRUE          | 28            | 28           | 0             | 1:26.54                         |
| 246       | TRUE          | 28            | 28           | 0             | 1:26.42                         |
| 247       | TRUE          | 28            | 28           | 0             | 1:26.83                         |
| 248       | TRUE          | 28            | 28           | 0             | 1:26.52                         |
| 249       | TRUE          | 28            | 28           | 0             | 1:26.96                         |
| 250       | TRUE          | 28            | 28           | 0             | 1:26.48                         |
| 251       | TRUE          | 28            | 28           | 0             | 1:28.49                         |
| 252       | TRUE          | 28            | 28           | 0             | 1:28.12                         |
| 253       | TRUE          | 28            | 28           | 0             | 1:26.68                         |
| 254       | TRUE          | 28            | 28           | 0             | 1:27.84                         |
| 255       | TRUE          | 28            | 28           | 0             | 1:26.61                         |
| 256       | TRUE          | 28            | 28           | 0             | 1:26.61                         |
| 257       | TRUE          | 28            | 28           | 0             | 1:27.04                         |
| 258       | TRUE          | 28            | 28           | 0             | 1:26.91                         |
| 259       | TRUE          | 28            | 28           | 0             | 1:26.46                         |
| 260       | TRUE          | 28            | 28           | 0             | 1:27.20                         |
| 261       | TRUE          | 28            | 28           | 0             | 1:28.08                         |
| 262       | TRUE          | 28            | 28           | 0             | 1:27.90                         |
| 263       | TRUE          | 28            | 28           | 0             | 1:27.20                         |
| 264       | TRUE          | 28            | 28           | 0             | 1:27.77                         |
| 265       | TRUE          | 28            | 28           | 0             | 1:26.74                         |
| 266       | TRUE          | 28            | 28           | 0             | 1:27.35                         |
| 267       | TRUE          | 28            | 28           | 0             | 1:26.87                         |
| 268       | TRUE          | 28            | 28           | 0             | 1:26.50                         |
| 269       | TRUE          | 28            | 28           | 0             | 1:26.18                         |
| 270       | TRUE          | 28            | 28           | 0             | 1:27.17                         |
| 271       | TRUE          | 28            | 28           | 0             | 1:27.32                         |
| 272       | TRUE          | 28            | 28           | 0             | 1:26.31                         |
| 273       | TRUE          | 28            | 28           | 0             | 1:26.77                         |
| 274       | TRUE          | 28            | 28           | 0             | 1:29.45                         |
| 275       | TRUE          | 28            | 28           | 0             | 1:27.10                         |
| 276       | TRUE          | 28            | 28           | 0             | 1:26.65                         |
| 277       | TRUE          | 28            | 28           | 0             | 1:26.83                         |
| 278       | TRUE          | 28            | 28           | 0             | 1:26.75                         |
| 279       | TRUE          | 28            | 28           | 0             | 1:26.02                         |
| 280       | TRUE          | 28            | 28           | 0             | 1:26.71                         |
| 281       | TRUE          | 28            | 28           | 0             | 1:26.06                         |
| 282       | TRUE          | 28            | 28           | 0             | 1:27.58                         |
| 283       | TRUE          | 28            | 28           | 0             | 1:26.94                         |
| 284       | TRUE          | 28            | 28           | 0             | 1:27.74                         |
| 285       | TRUE          | 28            | 28           | 0             | 1:27.15                         |
| 286       | TRUE          | 28            | 28           | 0             | 1:27.37                         |

| Id  | Result | #total | #true | #false | Execution time (min:sec) |
|-----|--------|--------|-------|--------|--------------------------|
| 287 | TRUE   | 28     | 28    | 0      | 1:27.06                  |
| 288 | TRUE   | 28     | 28    | 0      | 1:28.14                  |
| 289 | TRUE   | 28     | 28    | 0      | 1:28.23                  |
| 290 | TRUE   | 28     | 28    | 0      | 1:28.00                  |
| 291 | TRUE   | 28     | 28    | 0      | 1:26.81                  |
| 292 | TRUE   | 28     | 28    | 0      | 1:27.26                  |
| 293 | TRUE   | 28     | 28    | 0      | 1:26.81                  |
| 294 | TRUE   | 28     | 28    | 0      | 1:27.17                  |
| 295 | TRUE   | 28     | 28    | 0      | 1:26.43                  |
| 296 | TRUE   | 28     | 28    | 0      | 1:27.42                  |
| 297 | TRUE   | 28     | 28    | 0      | 1:26.41                  |
| 298 | TRUE   | 28     | 28    | 0      | 1:28.12                  |
| 299 | TRUE   | 28     | 28    | 0      | 1:29.00                  |
| 300 | TRUE   | 28     | 28    | 0      | 1:26.78                  |
| 301 | TRUE   | 28     | 28    | 0      | 1:27.04                  |
| 302 | TRUE   | 28     | 28    | 0      | 1:27.34                  |
| 303 | TRUE   | 28     | 28    | 0      | 1:27.04                  |
| 304 | TRUE   | 28     | 28    | 0      | 1:26.67                  |
| 305 | TRUE   | 28     | 28    | 0      | 1:26.13                  |
| 306 | TRUE   | 28     | 28    | 0      | 1:26.64                  |
| 307 | TRUE   | 28     | 28    | 0      | 1:26.93                  |
| 308 | TRUE   | 28     | 28    | 0      | 1:26.09                  |
| 309 | TRUE   | 28     | 28    | 0      | 1:26.64                  |
| 310 | TRUE   | 28     | 28    | 0      | 1:26.85                  |
| 311 | TRUE   | 28     | 28    | 0      | 1:27.05                  |
| 312 | TRUE   | 28     | 28    | 0      | 1:27.17                  |
| 313 | TRUE   | 28     | 28    | 0      | 1:27.29                  |
| 314 | TRUE   | 28     | 28    | 0      | 1:26.88                  |
| 315 | TRUE   | 28     | 28    | 0      | 1:26.86                  |
| 316 | TRUE   | 28     | 28    | 0      | 1:28.47                  |
| 317 | TRUE   | 28     | 28    | 0      | 1:26.73                  |
| 318 | TRUE   | 28     | 28    | 0      | 1:26.95                  |
| 319 | TRUE   | 28     | 28    | 0      | 1:27.09                  |
| 320 | TRUE   | 28     | 28    | 0      | 1:26.84                  |
| 321 | TRUE   | 28     | 28    | 0      | 1:26.72                  |
| 322 | TRUE   | 28     | 28    | 0      | 1:26.92                  |
| 323 | TRUE   | 28     | 28    | 0      | 1:27.06                  |
| 324 | TRUE   | 28     | 28    | 0      | 1:27.05                  |
| 325 | TRUE   | 28     | 28    | 0      | 1:26.28                  |
| 326 | TRUE   | 28     | 28    | 0      | 1:26.62                  |
| 327 | TRUE   | 28     | 28    | 0      | 1:26.86                  |
| 328 | TRUE   | 28     | 28    | 0      | 1:27.07                  |
| 329 | TRUE   | 28     | 28    | 0      | 1:27.20                  |
| 330 | TRUE   | 28     | 28    | 0      | 1:26.73                  |
| 331 | TRUE   | 28     | 28    | 0      | 1:26.99                  |
| 332 | TRUE   | 28     | 28    | 0      | 1:27.86                  |
| 333 | TRUE   | 28     | 28    | 0      | 1:26.85                  |
| 334 | TRUE   | 28     | 28    | 0      | 1:27.66                  |

| <b>Id</b> | <b>Result</b> | <b>#total</b> | <b>#true</b> | <b>#false</b> | <b>Execution time (min:sec)</b> |
|-----------|---------------|---------------|--------------|---------------|---------------------------------|
| 335       | TRUE          | 28            | 28           | 0             | 1:26.77                         |
| 336       | TRUE          | 28            | 28           | 0             | 1:26.82                         |
| 337       | TRUE          | 28            | 28           | 0             | 1:26.69                         |
| 338       | TRUE          | 28            | 28           | 0             | 1:27.79                         |
| 339       | TRUE          | 28            | 28           | 0             | 1:28.82                         |
| 340       | TRUE          | 28            | 28           | 0             | 1:27.54                         |
| 341       | TRUE          | 28            | 28           | 0             | 1:27.04                         |
| 342       | TRUE          | 28            | 28           | 0             | 1:26.93                         |
| 343       | TRUE          | 28            | 28           | 0             | 1:26.77                         |
| 344       | TRUE          | 28            | 28           | 0             | 1:27.19                         |
| 345       | TRUE          | 28            | 28           | 0             | 1:27.17                         |
| 346       | TRUE          | 28            | 28           | 0             | 1:27.80                         |
| 347       | TRUE          | 28            | 28           | 0             | 1:26.95                         |
| 348       | TRUE          | 28            | 28           | 0             | 1:27.02                         |
| 349       | TRUE          | 28            | 28           | 0             | 1:26.64                         |
| 350       | TRUE          | 28            | 28           | 0             | 1:28.76                         |
| 351       | TRUE          | 28            | 28           | 0             | 1:26.54                         |
| 352       | TRUE          | 28            | 28           | 0             | 1:26.96                         |
| 353       | TRUE          | 28            | 28           | 0             | 1:26.95                         |
| 354       | TRUE          | 28            | 28           | 0             | 1:26.97                         |
| 355       | TRUE          | 28            | 28           | 0             | 1:27.02                         |
| 356       | TRUE          | 28            | 28           | 0             | 1:26.25                         |
| 357       | TRUE          | 28            | 28           | 0             | 1:26.78                         |
| 358       | TRUE          | 28            | 28           | 0             | 1:27.00                         |
| 359       | TRUE          | 28            | 28           | 0             | 1:26.96                         |
| 360       | TRUE          | 28            | 28           | 0             | 1:28.06                         |
| 361       | TRUE          | 28            | 28           | 0             | 1:25.85                         |
| 362       | TRUE          | 28            | 28           | 0             | 1:26.99                         |
| 363       | TRUE          | 28            | 28           | 0             | 1:28.73                         |
| 364       | TRUE          | 28            | 28           | 0             | 1:27.40                         |
| 365       | TRUE          | 28            | 28           | 0             | 1:27.42                         |
| 366       | TRUE          | 28            | 28           | 0             | 1:27.64                         |
| 367       | TRUE          | 28            | 28           | 0             | 1:27.08                         |
| 368       | TRUE          | 28            | 28           | 0             | 1:27.20                         |
| 369       | TRUE          | 28            | 28           | 0             | 1:26.85                         |
| 370       | TRUE          | 28            | 28           | 0             | 1:27.33                         |
| 371       | TRUE          | 28            | 28           | 0             | 1:26.98                         |
| 372       | TRUE          | 28            | 28           | 0             | 1:28.25                         |
| 373       | TRUE          | 28            | 28           | 0             | 1:27.35                         |
| 374       | TRUE          | 28            | 28           | 0             | 1:26.57                         |
| 375       | TRUE          | 28            | 28           | 0             | 1:27.10                         |
| 376       | TRUE          | 28            | 28           | 0             | 1:27.07                         |
| 377       | TRUE          | 28            | 28           | 0             | 1:26.70                         |
| 378       | TRUE          | 28            | 28           | 0             | 1:26.99                         |
| 379       | TRUE          | 28            | 28           | 0             | 1:26.75                         |
| 380       | TRUE          | 28            | 28           | 0             | 1:26.37                         |
| 381       | TRUE          | 28            | 28           | 0             | 1:27.02                         |
| 382       | TRUE          | 28            | 28           | 0             | 1:26.57                         |

| <b>Id</b> | <b>Result</b> | <b>#total</b> | <b>#true</b> | <b>#false</b> | <b>Execution time (min:sec)</b> |
|-----------|---------------|---------------|--------------|---------------|---------------------------------|
| 383       | TRUE          | 28            | 28           | 0             | 1:26.71                         |
| 384       | TRUE          | 28            | 28           | 0             | 1:26.95                         |
| 385       | TRUE          | 28            | 28           | 0             | 1:26.65                         |
| 386       | TRUE          | 28            | 28           | 0             | 1:26.73                         |
| 387       | TRUE          | 28            | 28           | 0             | 1:27.49                         |
| 388       | TRUE          | 28            | 28           | 0             | 1:27.38                         |
| 389       | TRUE          | 28            | 28           | 0             | 1:26.36                         |
| 390       | TRUE          | 28            | 28           | 0             | 1:26.95                         |
| 391       | TRUE          | 28            | 28           | 0             | 1:28.09                         |
| 392       | TRUE          | 28            | 28           | 0             | 1:27.26                         |
| 393       | TRUE          | 28            | 28           | 0             | 1:26.61                         |
| 394       | TRUE          | 28            | 28           | 0             | 1:26.95                         |
| 395       | TRUE          | 28            | 28           | 0             | 1:27.09                         |
| 396       | TRUE          | 28            | 28           | 0             | 1:26.98                         |
| 397       | TRUE          | 28            | 28           | 0             | 1:26.79                         |
| 398       | TRUE          | 28            | 28           | 0             | 1:26.10                         |
| 399       | TRUE          | 28            | 28           | 0             | 1:26.18                         |
| 400       | TRUE          | 28            | 28           | 0             | 1:26.73                         |
| 401       | TRUE          | 28            | 28           | 0             | 1:27.19                         |
| 402       | TRUE          | 28            | 28           | 0             | 1:26.64                         |
| 403       | TRUE          | 28            | 28           | 0             | 1:26.28                         |
| 404       | TRUE          | 28            | 28           | 0             | 1:26.66                         |
| 405       | TRUE          | 28            | 28           | 0             | 1:27.14                         |
| 406       | TRUE          | 28            | 28           | 0             | 1:27.47                         |
| 407       | TRUE          | 28            | 28           | 0             | 1:26.87                         |
| 408       | TRUE          | 28            | 28           | 0             | 1:26.44                         |
| 409       | TRUE          | 28            | 28           | 0             | 1:26.82                         |
| 410       | TRUE          | 28            | 28           | 0             | 1:26.76                         |
| 411       | TRUE          | 28            | 28           | 0             | 1:26.17                         |
| 412       | TRUE          | 28            | 28           | 0             | 1:28.72                         |
| 413       | TRUE          | 28            | 28           | 0             | 1:26.64                         |
| 414       | TRUE          | 28            | 28           | 0             | 1:27.41                         |
| 415       | TRUE          | 28            | 28           | 0             | 1:27.08                         |
| 416       | TRUE          | 28            | 28           | 0             | 1:27.40                         |
| 417       | TRUE          | 28            | 28           | 0             | 1:27.17                         |
| 418       | TRUE          | 28            | 28           | 0             | 1:27.13                         |
| 419       | TRUE          | 28            | 28           | 0             | 1:27.60                         |
| 420       | TRUE          | 28            | 28           | 0             | 1:26.92                         |
| 421       | TRUE          | 28            | 28           | 0             | 1:27.21                         |
| 422       | TRUE          | 28            | 28           | 0             | 1:26.73                         |
| 423       | TRUE          | 28            | 28           | 0             | 1:26.78                         |
| 424       | TRUE          | 28            | 28           | 0             | 1:26.30                         |
| 425       | TRUE          | 28            | 28           | 0             | 1:27.29                         |
| 426       | TRUE          | 28            | 28           | 0             | 1:26.43                         |
| 427       | TRUE          | 28            | 28           | 0             | 1:26.36                         |
| 428       | TRUE          | 28            | 28           | 0             | 1:26.92                         |
| 429       | TRUE          | 28            | 28           | 0             | 1:26.53                         |
| 430       | TRUE          | 28            | 28           | 0             | 1:26.43                         |

| <b>Id</b> | <b>Result</b> | <b>#total</b> | <b>#true</b> | <b>#false</b> | <b>Execution time (min:sec)</b> |
|-----------|---------------|---------------|--------------|---------------|---------------------------------|
| 431       | TRUE          | 28            | 28           | 0             | 1:26.39                         |
| 432       | TRUE          | 28            | 28           | 0             | 1:26.06                         |
| 433       | TRUE          | 28            | 28           | 0             | 1:26.95                         |
| 434       | TRUE          | 28            | 28           | 0             | 1:26.92                         |
| 435       | TRUE          | 28            | 28           | 0             | 1:26.86                         |
| 436       | TRUE          | 28            | 28           | 0             | 1:26.93                         |
| 437       | TRUE          | 28            | 28           | 0             | 1:27.19                         |
| 438       | TRUE          | 28            | 28           | 0             | 1:26.70                         |
| 439       | TRUE          | 28            | 28           | 0             | 1:26.69                         |
| 440       | TRUE          | 28            | 28           | 0             | 1:26.14                         |
| 441       | TRUE          | 28            | 28           | 0             | 1:27.41                         |
| 442       | TRUE          | 28            | 28           | 0             | 1:26.86                         |
| 443       | TRUE          | 28            | 28           | 0             | 1:26.82                         |
| 444       | TRUE          | 28            | 28           | 0             | 1:26.57                         |
| 445       | TRUE          | 28            | 28           | 0             | 1:26.46                         |
| 446       | TRUE          | 28            | 28           | 0             | 1:27.02                         |
| 447       | TRUE          | 28            | 28           | 0             | 1:26.60                         |
| 448       | TRUE          | 28            | 28           | 0             | 1:27.32                         |
| 449       | TRUE          | 28            | 28           | 0             | 1:27.17                         |
| 450       | TRUE          | 28            | 28           | 0             | 1:26.86                         |
| 451       | TRUE          | 28            | 28           | 0             | 1:27.55                         |
| 452       | TRUE          | 28            | 28           | 0             | 1:26.40                         |
| 453       | TRUE          | 28            | 28           | 0             | 1:27.25                         |
| 454       | TRUE          | 28            | 28           | 0             | 1:29.69                         |
| 455       | TRUE          | 28            | 28           | 0             | 1:26.31                         |
| 456       | TRUE          | 28            | 28           | 0             | 1:26.15                         |
| 457       | TRUE          | 28            | 28           | 0             | 1:26.40                         |
| 458       | TRUE          | 28            | 28           | 0             | 1:26.34                         |
| 459       | TRUE          | 28            | 28           | 0             | 1:26.34                         |
| 460       | TRUE          | 28            | 28           | 0             | 1:26.72                         |
| 461       | TRUE          | 28            | 28           | 0             | 1:26.47                         |
| 462       | TRUE          | 28            | 28           | 0             | 1:26.81                         |
| 463       | TRUE          | 28            | 28           | 0             | 1:27.44                         |
| 464       | TRUE          | 28            | 28           | 0             | 1:27.34                         |
| 465       | TRUE          | 28            | 28           | 0             | 1:27.07                         |
| 466       | TRUE          | 28            | 28           | 0             | 1:27.05                         |
| 467       | TRUE          | 28            | 28           | 0             | 1:27.16                         |
| 468       | TRUE          | 28            | 28           | 0             | 1:27.16                         |
| 469       | TRUE          | 28            | 28           | 0             | 1:27.33                         |
| 470       | TRUE          | 28            | 28           | 0             | 1:27.18                         |
| 471       | TRUE          | 28            | 28           | 0             | 1:27.01                         |
| 472       | TRUE          | 28            | 28           | 0             | 1:26.94                         |
| 473       | TRUE          | 28            | 28           | 0             | 1:26.60                         |
| 474       | TRUE          | 28            | 28           | 0             | 1:27.13                         |
| 475       | TRUE          | 28            | 28           | 0             | 1:27.45                         |
| 476       | TRUE          | 28            | 28           | 0             | 1:27.06                         |
| 477       | TRUE          | 28            | 28           | 0             | 1:26.36                         |
| 478       | TRUE          | 28            | 28           | 0             | 1:26.82                         |



| Id  | Result | #total | #true | #false | Execution time (min:sec) |
|-----|--------|--------|-------|--------|--------------------------|
| 479 | TRUE   | 28     | 28    | 0      | 1:27.00                  |
| 480 | TRUE   | 28     | 28    | 0      | 1:26.32                  |
| 481 | TRUE   | 28     | 28    | 0      | 1:27.21                  |
| 482 | TRUE   | 28     | 28    | 0      | 1:26.53                  |
| 483 | TRUE   | 28     | 28    | 0      | 1:26.13                  |
| 484 | TRUE   | 28     | 28    | 0      | 1:27.20                  |
| 485 | TRUE   | 28     | 28    | 0      | 1:28.13                  |
| 486 | TRUE   | 28     | 28    | 0      | 1:25.32                  |
| 487 | TRUE   | 28     | 28    | 0      | 1:27.05                  |
| 488 | TRUE   | 28     | 28    | 0      | 1:26.68                  |
| 489 | TRUE   | 28     | 28    | 0      | 1:26.18                  |
| 490 | TRUE   | 28     | 28    | 0      | 1:26.57                  |
| 491 | TRUE   | 28     | 28    | 0      | 1:26.49                  |
| 492 | TRUE   | 28     | 28    | 0      | 1:26.88                  |
| 493 | TRUE   | 28     | 28    | 0      | 1:27.63                  |
| 494 | TRUE   | 28     | 28    | 0      | 1:27.54                  |
| 495 | TRUE   | 28     | 28    | 0      | 1:27.98                  |
| 496 | TRUE   | 28     | 28    | 0      | 1:27.07                  |
| 497 | TRUE   | 28     | 28    | 0      | 1:26.93                  |
| 498 | TRUE   | 28     | 28    | 0      | 1:26.86                  |
| 499 | TRUE   | 28     | 28    | 0      | 1:27.00                  |
| 500 | TRUE   | 28     | 28    | 0      | 1:26.50                  |
